# Supplementary material for: Analysis of WRKY Resistance Gene Family in Boehmeria nivea (L.) Gaudich: Crosstalk Mechanisms of Secondary Cell Wall Thickening and Cadmium Stress
Source: Front Plant Sci. 2022 Mar 28;13:812988. doi: 10.3389/fpls.2022.812988 (PMC9010656; doi:10.3389/fpls.2022.812988)
Supplement: Supplementary file 3 [file Table_1.XLSX]

## Sheet: a
Table S1: Basic information of the 60 BnGWRKY genes identified in this study
Name	ID	Subgroup	Chr location	position			Size（aa）	MW(Da)	pI	Conserved motif	Zinc finger Domain pattern	Predicted Subcellular location	GRAVY	Protein sequence	CDS sequence
Maker00074910	BnGWRKY1	Group Ⅲ	chr1	4015563	4019803	+	351	38120.4	7.68	WRKYGQK	C-X7-C-X23-H-X-C	nucleus	-0.607977	MFKPKNTTSLNKQKNPELTMEDYTSTKSLVLYGCRLAKDLESNIDDVFNKADEGANLCDQIAKIFGSAAERLRGGQGQRSSSSSSRAVSPIPDQAMHASVDASLHEWLANSSGFVTQGIDANQPVSLQGMDWLVSAARNTINTCSSSSSQRSRRRKDDVETSIVKMAAPQIGNTEIPPDDGYTWRKYGQKEIMGKKYPRGYYRCTHQRQFNCPAKKQVQRDDRDPFTFEVMYRGRHTCHLSSTAPSMLPSQDNMSSHDHAGHQLVPPAYGATTSIASSSAAAAALGSWLSIHAGAGGGPEASAVLELPVVDMADAMFNSGSSSTSNSMDFLFPSAEDHKRSDHVLGNKKMG	ATGTTCAAACCCAAAAATACAACAAGCCTAAACAAGCAAAAAAACCCTGAATTGACCATGGAGGATTACACAAGCACTAAGTCATTGGTCCTCTATGGATGTAGGTTAGCTAAGGACTTGGAATCAAACATCGACGACGTGTTTAACAAGGCCGATGAGGGCGCGAACCTATGCGATCAGATCGCGAAGATCTTTGGCAGCGCTGCGGAGAGGCTGCGCGGCGGGCAGGGTCAGCGTAGTAGTAGTAGTAGTAGTCGTGCCGTTTCGCCTATTCCCGATCAGGCCATGCACGCGAGTGTTGACGCAAGTTTGCACGAATGGCTCGCCAATTCGAGCGGCTTCGTCACGCAAGGAATCGACGCGAATCAGCCCGTTTCGTTGCAAGGCATGGATTGGCTT…
Maker00076242	BnGWRKY2	Group Ⅲ	chr1	4020765	4023233	-	365	40996.4	5.01	WRKYGQK	C-X7-C-X23-H-X-C	nucleus	-0.77863	MGTCAIEPEILSKKLMKGLVQGRDSATQLRTLLCKPFGDHGSVISAEELAEKILTSFDETISLLTSSSSDNSDDHGALNGGDLMNDGHGISPEPLDHHSHCDDRSSEEYSGESSKKRSAPALKDRRGCYKRRKSSQSWTTIMPTIEDGQAWRKYGQKEILNSQYPRAYFRCTRKNEQGCRATKQVQQIQDNPKMYQTTYIGQHTCKHILKAPQMIVDNSEPYNFESLVNNYKASTTTIDFDHHHSRNKNGSGIGAPTLMEEEQEQDQVLMIKEEAQISEDLSEKSSFDTEDLWSDFKDIELSDPSMGLLSPNGRRAGTDHDQGTVDSIPFSFVDRISMDIMIDDFVVKSIDFRDFDEAEFPLGSA	ATGGGTACTTGTGCTATAGAGCCAGAAATTTTGTCCAAAAAATTGATGAAAGGGCTAGTTCAAGGCCGAGACTCGGCGACCCAGCTCCGAACTCTTCTTTGCAAGCCTTTTGGTGATCATGGGTCGGTGATCTCGGCCGAAGAACTAGCCGAGAAGATCTTGACATCTTTTGATGAAACCATTTCTTTGCTCACTAGTAGTAGTAGTGATAACTCCGACGACCATGGCGCTTTGAACGGTGGTGATTTGATGAACGATGGCCATGGGATCAGCCCTGAGCCCTTGGATCACCACTCACATTGCGATGACCGGAGCTCGGAGGAATATTCCGGCGAGAGCTCGAAGAAGAGATCGGCGCCGGCTCTCAAAGATCGGAGAGGATGTTACAAGAGGAGAAAA…
Maker00075096	BnGWRKY3	Group Ⅱe	chr1	6457856	6460223	+	354	39284.7	8.41	WRKYGQK	C-X5-C-X23-H-X-H	nucleus	-0.785311	MADDWDLNAVVRSCKSAANKTASLFEDEDETLSFLASLTLLQDQNNNNNNNMNQYEPTNDNNNNAFQELQQFFSKPTFPHNPTTASKNTIILNSLIPDHLGVSSGQQNKMQDHVNGVVFSPQPQQVQQRAEAQKNNNNRSPVMLRRPVPPGYDASPDHPSLLLSTITRPIRKRRNQQKKTVRTVTKENLHSDLWSWRKYGQKPIKGSPYPRNYYRCSSMKGCSARKQVERSLRNPELFVLTYTGEHRHPRPNHRNSLAGTTRPAKALPPPPAAAAASSSCSSSSPQSASSGCRQLSPTTPLCALAEEEMHVTAASGGGEYCSDINNESEKGLIEEGVLIPDVVLSDDFFNDILI	ATGGCCGATGATTGGGATCTCAACGCCGTGGTCCGGAGCTGCAAATCCGCCGCCAACAAAACGGCGTCGTTGTTTGAAGATGAAGATGAAACTCTCTCTTTCTTGGCCTCCCTAACATTACTCCAAGACCAAAACAACAACAACAACAACAACATGAACCAATACGAACCCACAAACGACAACAATAACAACGCTTTCCAAGAATTGCAACAATTCTTCTCCAAACCAACCTTTCCCCACAACCCCACCACCGCTTCAAAAAATACCATTATTCTAAATTCCCTCATTCCTGATCACTTGGGAGTCTCTAGTGGCCAACAAAACAAAATGCAAGACCACGTGAACGGTGTCGTTTTCTCGCCACAGCCACAGCAAGTGCAACAACGAGCCGAGGCACAG…
Maker00075081	BnGWRKY4	Group Ⅲ	chr1	6856113	6859839	-	417	45722	5.65	WRKYGQK	C-X7-C-X23-H-X-C	nucleus	-0.789209	MMENINKGDWEANNNLVNELTRGKELARQLQMHLQSNVGTSSSQETCEYLVQKILVSFEKGISLLSWPPNPAAAAGDQPQPLQHGAGGSGGGGGGGGGVQISESPPSLAGSPRSDQDSDRDQERDASRKRKSLPRWTKQVRVNPGMGLEGPLDDGFSWRKYGQKDILGAKYPRGYYRCTHRNVQGCLATKQVQRSDDDPNIFEITYRGRHTCNQPPSNTSTPTIDQPMSVHENQEHLIPNTNTIELSHHQQNMNMINVQLNQQNLQNAQLEHDMLSNLRSGLRVITEGLDDNSFHFASSSSATRGVKTEAINDSRFLANANSSMIMGNTSFVGTEFSPTTSFHVSPAASGTSYFSVSPQGGIEDHFGVSQNFHNPNSESDQINTNSATNNAPNLDFPFG…	ATGATGGAAAATATTAATAAGGGAGATTGGGAGGCGAATAACAATCTAGTGAACGAGCTGACACGTGGCAAGGAGCTAGCGAGGCAGCTACAGATGCATCTGCAGAGCAACGTCGGAACGTCGTCGTCTCAGGAGACGTGTGAGTATTTGGTCCAGAAGATCCTCGTTTCCTTTGAGAAGGGGATCTCTTTGCTCAGCTGGCCGCCTAATCCCGCGGCCGCGGCGGGAGATCAGCCGCAGCCGCTACAGCACGGTGCGGGCGGCAGCGGTGGCGGAGGCGGAGGCGGAGGCGGAGTCCAGATATCGGAGTCCCCGCCATCGCTAGCGGGAAGCCCGCGGAGCGATCAGGACTCCGACCGCGACCAGGAGCGAGATGCCTCTAGGAAGAGGAAGAGTTTG…
Maker00079308	BnGWRKY5	Group Ⅱe	chr2	14052453	14055462	-	337	35232.9	6.51	WRKYGQK	NA	nucleus	-0.352226	MCSLFFVPSTNINNSNSNSNSILSNMDQSFQGDLTDILRGSTNSTNNNSGYGDQLGLPNISGTDWHFSSDHHDHHHNNSTIGNISTNNFSSLLEDDHQVAILSLPDIDHHHMPFGDPFSNMRDPLLHDNASPAATFFGASSDAAAPEFFSVPGPAPAHALLDHHHHQNHQQEAKFRPSCNIFSRMLQINPSSSTASAASAAIGPSSAAAVANKHVSEAAVGPAQCDNSVAAAVASPRGSVIKAGEGIINVGSGSQAAAAAAAVVENMAGAGGGMQISSPRNPGIKRRKSQAKKVVCIPAPAAANSRASGEVVPSDLWAWRKYGQKPIKGSPYPRLSL	ATGTGCAGTTTGTTCTTCGTCCCCAGCACCAATATCAACAACAGCAACAGCAACAGCAACAGTATTCTCAGCAACATGGACCAGAGTTTCCAAGGCGATTTGACCGATATTTTGCGCGGATCAACAAACAGTACCAACAACAATTCCGGCTATGGAGATCAACTAGGCCTACCCAACATCTCAGGCACCGATTGGCACTTCTCGTCCGATCACCACGATCATCACCACAACAACAGTACTATTGGGAACATTAGTACCAATAATTTCTCATCACTATTAGAAGACGATCACCAAGTAGCAATACTGAGTCTCCCTGATATTGACCACCACCACATGCCCTTCGGAGATCCCTTCTCCAACATGAGAGATCCGCTCCTCCACGACAACGCCAGCCCCGCG…
Maker00088387	BnGWRKY6	Group Ⅱe	chr2	14644560	14648440	+	570	60904.3	6.11	WRKYGQK	C-X5-C-X23-H-X-H	nucleus	-0.677895	MCSLFFVPSTNINNSNNNNNILSNMDQSFQGDLTDILRGSTNSTNNNSGYGDQLGLPNISGTDWHFSSDHHDHHHNNSTIGNISTNNFSSLLEDDHQVTILSLPDIDHHHHMPFGDPFSNMRDPLLHDNAGPAAAFFGASSDAAAPGFFGVPGPAPAHALLDHHHHQNHQQEAKFRPSCNIFSRMLQINPSSSAASAASAAIGPSSAAAVANKHVSEAAVGPAQCDNSVAAAVASPRGSVIKAGEGIINVGSGSQAAAAAVAENMAGGGGGMQISSPRNPGIKRRKSQAKKVVCIPAPAAANSRASGEVVPSDLWAWRKYGQKPIKGSPYPRGYYRCSSSKGCSARKQVERSRTDPNMLVITYTSEHNHPWPTQRNALAGSTRSQPSKTTNSASSKTSP…	ATGTGCAGTTTGTTCTTCGTCCCCAGCACCAATATCAACAACAGCAACAACAACAACAATATTCTCAGCAATATGGACCAGAGTTTCCAAGGCGATTTGACCGATATTTTGCGCGGATCAACAAACAGTACCAACAACAATTCCGGCTATGGAGATCAACTAGGCCTACCCAACATCTCAGGCACCGATTGGCACTTCTCGTCCGATCACCACGATCATCACCACAACAACAGTACTATTGGGAACATTAGTACCAATAATTTCTCATCACTATTAGAAGACGATCACCAAGTAACAATACTGAGTCTCCCTGATATTGACCACCACCACCACATGCCCTTCGGAGATCCCTTCTCCAACATGAGAGATCCGCTCCTCCACGACAACGCCGGCCCCGCG…
Maker00065350	BnGWRKY7	Group Ⅱa	chr2	22013878	22016067	+	345	38567.2	8.9	WRKYGQK	C-X5-C-X23-H-X-H	nucleus	-0.815362	MLDFLGQFEAVGANWNKNLVEPNKQAFSSSTPVMEYSSSAFVDTSLDLNSKPLRLVDDAPNKEVQSKFIDFGKKLSAKDETGALVEELKRVSAENKKLTEMLTVMCENYNTLRSQMVEYMNKNQAEKELSPSKKRKSESSNNTSTNIVGNNNGNSESSSTDEESFKKPREEPIKTKIWKSYVKTEASDTSLIVKDGYQWRKYGQKVTRDNPSPRAYFKCSFAPSCPVKKKVQRSVEDQRILVATYEGEHNHPQPSQLEATSGSNRCVASLVPSSPNITLDFTKPKSSSNDTKTAKPAARIDSPDVRQFLVEQMASSLTKDPNFTAALAAAISGRIYEQRNPTEKW	ATGCTTGACTTTCTTGGTCAATTTGAGGCAGTTGGTGCTAATTGGAATAAGAACTTGGTTGAGCCTAACAAGCAAGCCTTTTCTTCTTCGACGCCAGTTATGGAATACTCTTCTTCTGCTTTTGTTGATACTTCTTTGGATCTCAATTCTAAGCCTCTCCGACTTGTTGATGATGCTCCGAACAAAGAGGTTCAGAGCAAATTCATTGACTTTGGGAAAAAGCTTTCCGCTAAAGATGAGACTGGTGCTTTGGTTGAGGAATTGAAGCGGGTAAGTGCTGAGAACAAGAAGCTGACAGAGATGTTGACTGTTATGTGCGAAAACTACAACACTTTGAGAAGCCAAATGGTTGAGTACATGAACAAGAACCAGGCAGAGAAAGAGCTAAGCCCATCGAAG…
Maker00069778	BnGWRKY8	Group Ⅱe	chr2	23227114	23229539	-	343	37406.7	5.26	WRKYGQK	C-X5-C-X23-H-X-H	nucleus	-0.887755	MDNTSTRSSASGFMGSFGNNRSNNIMFVSNAERSSDHIQDRNDDNVTANSNSGTTTPTTTSTTDQNGSDSPLSSNIFNDFAKNIMVTPTTSSLSSPKKSSRRSVQKRVVSIPIKEVEGSSRLKGETSSVTSTPPSDSWAWRKYGQKPIKGSPYPRGYYRCSSSKGCPARKQVERSRSDPTMLVVTYSAEHNHPWPASSRTNHHHHHHHNNQNNHPPASEKPVKEEDEELEEEEEEEESTRTGPEPGPDPEMEPIGFAGGLHAAGDELIGSWFGADGHMETAPSVLEIPMTFADGGGACDQRAAVFPVNMMGEEDESLFADLGELPECSLVFRHRGVGPQVEIC	ATGGATAACACCAGTACTAGAAGCAGTGCTTCTGGGTTCATGGGCAGTTTCGGCAATAACAGATCAAACAACATAATGTTTGTGAGTAATGCCGAGAGATCATCAGATCATATTCAAGACAGAAACGACGACAACGTCACTGCTAATAGTAATTCTGGCACTACAACGCCCACTACCACTAGTACTACTGATCAAAATGGCTCCGACTCTCCTCTTTCCTCAAATATCTTCAACGACTTCGCCAAGAATATCATGGTCACTCCAACCACTTCCTCTCTCTCATCCCCAAAGAAAAGTAGCCGGAGATCGGTACAGAAAAGAGTGGTGTCAATTCCGATAAAGGAAGTGGAAGGGTCGTCGCGGCTCAAAGGCGAGACCTCCAGCGTCACAAGCACTCCG…
Maker00062515	BnGWRKY9	Group Ⅱc	chr2	24558938	24561496	+	372	41129.7	6.34	WRKYGQK	C-X4-C-X23-H-X-H	nucleus	-1.00376	MSNEPYKDLYNFHDQLFQADQEFFSSSKLISTPNMSSGSTGCYNLQGFDNPSSYMSFTECLQGSMDYNSLSGSVFGLSPSSSEVFSSIENNQKPLDHHQYPNHLGANSPSSDQNPVTPNDHSHSMSSSSTEAGAEEDSKKDHVKSKGTPLEDEEDHSKKVGKGKKKGDKKQKEPRFAFMTKSEVDHLEDGYRWRKYGQKAVKNSPYPRSYYRCTTQKCSVKKRVERSFQDPSTVITTYEGQHNHPIPSALRGNAAAAAAAAAAMFPPSAASGGGGLFPHGFLFHNMPHMSFHYDNNSNNSNNMVINTTSTNNQGSSSTGSILSRANYAQSSNPRDENVNNNNNNNKQGYSYHDDDYGLLQDIVPSMFLKQEP	ATGTCTAATGAACCTTACAAAGACCTCTACAATTTCCATGATCAGCTTTTCCAAGCCGATCAAGAATTTTTCAGCTCTTCAAAGCTCATAAGCACTCCAAACATGTCCTCAGGCTCAACAGGCTGTTACAATCTACAAGGGTTTGATAACCCTAGTTCATACATGAGTTTCACCGAATGTTTACAAGGATCTATGGACTATAACTCGCTTTCGGGCTCGGTTTTTGGCTTGTCTCCTTCATCTTCGGAGGTTTTCTCATCCATTGAAAACAACCAAAAGCCTCTTGACCATCACCAATACCCTAATCACTTGGGTGCCAATAGCCCTAGCAGTGATCAAAATCCGGTGACCCCAAACGATCATTCGCATTCGATGTCGTCTTCTTCGACAGAGGCCGGT…
Maker00062719	BnGWRKY10	Group Ⅱb	chr2	26203222	26206002	-	591	63092.7	6.32	WRKYGQK	C-X5-C-X23-H-X-H	nucleus	-0.610829	MDKGWGLTLDSDSLGFFVNKQLEAKRNSMFSGVDFPAKLAHHQPSDTSADSNRAHVGVVDFFSDQKRPVNDDRESATVAAVKKEDSLADQPSRPSFDVNTGLGLLTANTGSDQSTVDDGVSSDVEDKRSKIELAQLQVQLQRMNAENQKLREMLSQVTSNYSALHMQFVAVTSQHQKIANLAETSQEHENVEGKLGEQEERKQERQFLDLGPSSATDDPAASNNSSSSSEDRTRSATPQNKDVAQFDLQDNSSNFRSSDGKRIGREESPDSEWGPNKAPKLNPSTNNKPIEQSADATMRKARVSVRARSEAPMITDGCQWRKYGQKMAKGNPCPRAYYRCTMAVGCPVRKQVQRCAEDRTVLITTYEGNHNHPLPPAAMAMASTTTAAANMLLSGSMSS…	ATGGACAAAGGATGGGGTTTAACACTCGATTCTGATTCCCTCGGTTTCTTCGTCAACAAGCAACTGGAAGCCAAGAGGAACTCCATGTTCTCCGGCGTCGACTTCCCGGCCAAGCTCGCGCATCACCAGCCGTCCGATACCAGCGCCGACAGCAATCGCGCGCACGTGGGAGTCGTTGACTTCTTCTCCGATCAGAAACGCCCCGTCAACGACGATCGCGAATCCGCCACCGTCGCTGCCGTCAAGAAGGAGGACTCTCTCGCCGACCAGCCCTCACGGCCGTCTTTCGATGTCAATACTGGTTTAGGCCTTCTTACTGCTAATACTGGAAGCGATCAATCAACGGTGGATGATGGGGTTTCATCGGATGTGGAAGATAAACGATCCAAGATTGAGTTG…
Maker00071140	BnGWRKY11	Group Ⅰ	chr3	100412	105975	+	738	80166.8	5.61	WRKYGQK, WRKYGQK	C-X4-C-X23-H-X-H, C-X4-C-X22-H-X-H	nucleus	-0.653117	MDGDEVPDSDDRETLAPAPEEEAVAARVRGSSIAERRAAKFGFNAEKISTARFRTASPLASPAAARSPCLTIPPGISPTALLDSPIMLPNSLAMPSPTTGTFPFPPYRHESSILNSATRDDGDKDVGSFRFKPFAGDKRLPDGSTSGNKLTEVVDQAMVLDQPSMGFEFSTGFPHEATSNHCVKPSNDVKVLNNVVMDAKPVNMEMAQDVASDQYLSREPIYGEENVSQDISEGNNSEYNSSGSMARTAEDGYNWRKYGQKQVKGSEYPRSYYKCTHPNCQVKKKVERSHDGQITEIIYKGAHNHAKPQPNRRAALGPGFSFDDMSEVSEGTGACLKAEGGSVWTNIQSGSEVKLGSDGRGDRLELTSSASILTDLSDRTISTNYGKSLCAIESTETPE…	ATGGACGGAGACGAGGTCCCGGACTCCGACGATCGGGAAACCCTAGCTCCAGCTCCGGAGGAGGAGGCGGTGGCGGCGAGGGTGCGAGGAAGCAGTATCGCGGAGCGCAGGGCGGCGAAGTTCGGCTTCAACGCCGAGAAGATCAGCACGGCGAGATTTCGGACGGCGAGCCCTCTCGCCTCGCCGGCGGCGGCGAGGTCTCCGTGTCTCACTATTCCACCTGGCATCAGTCCTACCGCCTTGCTTGATTCTCCGATTATGCTTCCGAACTCTCTTGCAATGCCGTCTCCGACCACCGGTACATTTCCGTTTCCGCCTTACCGTCATGAAAGTTCAATTCTGAATTCAGCAACTAGGGACGACGGAGATAAGGATGTTGGCTCCTTTAGATTTAAGCCT…
Maker00024930	BnGWRKY12	Group Ⅰ	chr3	274367	279813	+	689	74833.2	5.95	WRKYGQK, WRKYGQK	C-X4-C-X23-H-X-H, C-X4-C-X22-H-X-H	nucleus	-0.630769	MDGDEVPDSDDRETLAPAPEEEAVAARVRGSSIAERRAAKFGFNAEKISTARFRTASPLASPAAARSPCLTIPPGISPTALLDSPIMLPNSLAMPSPTTGTFPFPPYRHESSIPNSSTRDDRDKGVGSFRFKPFAGDKPLPDGSTSGNKLTEVVDQAMVLDQPSMGFEFSTGFPHEATSNHCVKPSNDVKVLNNVVMDAKPVNMEMAQDVASDQYLSREPIYGEENVSQDISEGNNSEYNSSGSMARTAEDGYNWRKYGQKQVKGSEYPRSYYKCTHPNCQVKKKVERSHDGQITEIIYKGAHNHAKPQPNRRAALGPGFSFDDMSEVSEGTGACLKAEGGSVWTNIQSGSEVKLGSDGRGDRLELTSSASILTDLSDRTISTNYGKSLCAIESTETPE…	ATGGACGGAGACGAGGTCCCGGACTCCGACGATCGGGAAACCCTAGCTCCAGCTCCGGAGGAGGAGGCGGTGGCGGCGAGGGTGCGAGGAAGCAGTATCGCGGAGCGCAGGGCGGCGAAGTTCGGCTTCAACGCCGAGAAGATCAGCACGGCGAGATTTCGGACGGCGAGCCCTCTCGCCTCGCCGGCGGCGGCGAGGTCTCCGTGTCTCACAATTCCACCTGGCATCAGTCCTACCGCCTTGCTTGATTCTCCGATTATGCTTCCGAACTCTCTTGCAATGCCGTCTCCGACCACCGGTACATTTCCGTTTCCGCCTTACCGTCATGAAAGTTCAATCCCGAATTCATCAACTAGGGACGACAGAGATAAGGGTGTTGGCTCCTTTAGATTTAAGCCT…
Maker00025486	BnGWRKY13	Group Ⅰ	chr3	2674283	2676840	+	551	61134.4	6.34	WRKYGQK, WRKYGQK	C-X4-C-X23-H-X-H, C-X4-C-X22-H-X-H	nucleus	-0.9951	MTFSFTDLLANNTTSTNMDNTNVGQTSWGFSDQNGNEIRNFKTLQPISINPSSSFFANNNNNNNNSSSVPFSPTDFLNSPIFLSASNALPSPTTGAFLGQTFDWTSNSKDKNSNNKNQEIEDEDKFFADFSFQPQTGSSSATSSFIFQSSANTVSVVEQQQQQQAWDFNKPKNETTSFSVLEKPEVKSEYPSNSRDQSQYSETHYQYVREQKSEDGYNWRKYGQKQVKGSENPRSYYKCTNPNCPMKKKVERSLDGQITEIVYKGSHNHPKPQSTRRSSSGSINQVSSYANSDHSGHTLSNAVPEESSESIGEDGFDRNSPTFISGGDNDDNEPESKRWKGDNENEVFSASGNRTVKEPRVVVQTTSEIDILDDGYRWRKYGQKVVKGNPNPRSYYKCT…	ATGACTTTTTCTTTCACTGACCTCCTCGCAAACAACACCACCAGTACAAACATGGACAACACTAACGTTGGCCAAACAAGCTGGGGATTTTCAGACCAAAATGGAAATGAAATCAGAAACTTCAAGACCCTTCAACCTATTTCCATCAATCCTAGCTCTTCATTTTTTGCCAACAATAACAACAACAACAACAACTCTTCTTCTGTGCCCTTTAGCCCAACTGATTTCTTGAACTCTCCAATTTTCCTCTCTGCTTCTAATGCTCTTCCATCTCCTACAACCGGGGCTTTTCTTGGTCAAACCTTTGACTGGACAAGTAATTCCAAGGACAAAAATAGCAACAACAAGAATCAGGAAATTGAAGATGAGGACAAGTTTTTCGCTGATTTTTCATTCCAA…
Maker00047381	BnGWRKY14	Group Ⅱb	chr4	2763518	2766980	-	623	66919.1	6.28	WRKYGQK	C-X5-C-X23-H-X-H	nucleus	-0.628571	MARGSGLSIDSDPIGFFIHKPIVLNSFQENNNNNNNLNHQKIKIFKQYYNHHNHCSMDTTTALQSSSPPPTSTTTTLQFPVNLNHHHVDSPPPPSDHAKRTAMIVNEMDFFARSSNAKANEDHMSSDDDINNNNIAVDDDHKDLINTGLNLLTTNTSSDQSIVVDDGTTAVPAGDANEKKAYKESELAALHAKFEQVKSENQRLKYALNHVTTNYNALQMHLFVMMENQKADQSSPDGGGGGGIPRGSVAPRQFMDLGLASIDAEAPSNEPSLSSNSDERKPGLTETGNNGTAKTNAPREDSVDDHHSSKIQRTTSSCSAKDNNNNDQTEATMRKARVSVRARSEAPMIADGCQWRKYGQKMAKGNPCPRAYYRCTMASGCPVQRGNPKLEIVVKWREE…	ATGGCCAGAGGAAGTGGACTCTCCATTGATTCAGATCCAATTGGGTTCTTTATCCACAAACCAATAGTACTAAACTCATTCCAAGAGAACAACAACAACAACAACAATCTCAACCATCAAAAGATCAAGATCTTCAAGCAATATTACAACCATCACAATCATTGTTCCATGGACACCACTACTGCTCTTCAAAGCTCTAGTCCTCCTCCGACCTCGACGACGACGACTCTCCAGTTCCCAGTCAACCTCAACCACCACCACGTCGACTCTCCGCCACCACCGTCCGATCATGCCAAACGGACGGCAATGATCGTCAACGAGATGGACTTCTTCGCCAGATCATCAAACGCCAAAGCAAATGAAGATCATATGTCCTCCGACGATGATATTAATAATAAT…
Maker00053039	BnGWRKY15	Group Ⅲ	chr4	3694089	3695905	+	318	35538.5	5.24	WRKYGQK	C-X7-C-X23-H-X-C	nucleus	-0.581447	MIIDELVQGRELATQLRALLASAGESSESAAEISAGDLVSRIMTSFTNTIILLDRNDAVKDENEAMSSLDARKSEDSEESNCRSALSPARAPKDRRGSYKRRKSSFTQIKDTATEINDGHAWRKYGQKKILKAKHPRNYFRCTHKYDQHCLATKDVQRIQDDPPLFRTTYYGQHTCRSLPSAPELVLDCTIPAHNSSAVLLSFNTANNTDLNNLATKHPFFSPPFNSITPHVVKQEYFGGEILAADIVPYGNSAMNKAQLDQSDPISTDYLRDDDADLRFGQSVLSPNFESDIQEDVLSEGIIGMESFEDDVLQHLNF	ATGATCATCGACGAGCTCGTTCAGGGCCGAGAGCTCGCGACCCAGCTACGAGCTCTGCTCGCCAGCGCCGGCGAGAGCTCGGAATCGGCGGCGGAGATCTCCGCCGGAGATCTGGTGTCGAGGATAATGACGAGCTTCACGAACACCATCATCCTGCTGGACCGAAACGACGCCGTCAAGGACGAAAACGAAGCGATGAGCTCCCTGGACGCTCGGAAGTCGGAGGATTCCGAGGAGAGCAACTGCCGGAGCGCCTTGTCGCCGGCGAGGGCTCCGAAGGATCGCCGAGGGAGCTACAAGAGGAGGAAGAGCTCGTTTACACAGATAAAAGACACTGCAACGGAGATTAATGATGGTCATGCGTGGAGGAAATATGGCCAAAAAAAGATTCTCAAAGCC…
Maker00073713	BnGWRKY16	Group Ⅰ	chr4	10571594	10575344	-	497	55058	7.96	WRKYGQK, WRKYGQK	C-X4-C-X23-H-X-H, C-X4-C-X22-H-X-H	nucleus	-1.04346	MVPVGESVKEEVSSDTLQEREDSNVTNHTSEENLSNGVSTLQPGKRGTLPSIKTEKMKPLSDSTADKLQLNQEGMTSPETPKKGLQSPESSSLPSQSGQERSTPSTIREKVSEDGYNWRKYGQKLVKGNEYVRSYYRCTHPNCQVKKQLKRLHDGQVVDIIYFGHHDHPKPQLNVPVAVGFVVSIVEERRKETSLTTAEDTLVDEHSQQTPQAKTVDIPPISNVSAKDSTKETVSQSNKIKDEVCSDDDPDSKRQKKNKDNLKTTAPDKSASEPRVIVQTLSEVDIVNDGYRWRKYGQKLVKGNPNPRSYYRCSNSGCPAKKHVERASHDPKMVMTTYEGQHSHDIPPARVVTHNVSGSNASPTAHNGDSNTKSDGNATRLDMVVDAILEHGSKPKEEQ…	ATGGTTCCGGTAGGGGAAAGTGTAAAAGAGGAAGTTTCTTCGGATACACTGCAGGAGAGAGAGGATTCCAATGTTACAAATCATACGTCGGAGGAGAACCTGAGTAATGGGGTTTCCACACTGCAACCCGGCAAAAGAGGTACCCTTCCATCAATAAAAACTGAGAAAATGAAGCCGCTGTCTGATTCTACAGCTGATAAATTGCAACTAAATCAAGAAGGAATGACATCACCCGAAACACCAAAAAAAGGATTGCAAAGCCCTGAAAGTAGTTCCCTGCCCTCGCAATCTGGTCAGGAACGAAGCACTCCGTCTACAATACGTGAGAAAGTGTCAGAGGATGGATATAACTGGCGAAAATATGGACAGAAACTCGTCAAAGGAAATGAATATGTACGG…
Maker00012805	BnGWRKY17	Group Ⅱd	chr4	16671317	16673451	+	268	28889	4.85	WRKYGQK	C-X5-C-X23-H-X-H	nucleus	-0.50709	MQYFIAKRGVHKRVVSVPIGDVEGSKSKGDSFPPSDSWAWRKYGQKPIKGSPYPRGYYRCSSSKGCPARKQVERSRVDPTTLIITYACDHNHPIPSKSATSAPATSIEEPAAKSDDEEEEEEGEEAVAAFSGGEQGLGGIVGDGEGLLGGGFGIAGEWFGYVASTAVLESPIYGGADVDADVAFSAVSGEDESLFGDLGELPECAVVFRRRIEVPCCGRQDRDCGPPLSQSLDSSMDRSINRDSVLRSLSLNRENEMSSFRIQRCNFD	ATGCAATATTTTATAGCCAAGAGGGGTGTGCACAAGAGGGTTGTGTCAGTACCGATCGGTGACGTGGAGGGATCTAAGAGCAAAGGCGACTCATTTCCACCGTCGGATTCGTGGGCCTGGCGGAAGTACGGCCAGAAGCCTATCAAGGGCTCGCCTTATCCCAGGGGATATTATCGATGTAGTAGTTCGAAGGGCTGCCCGGCGAGGAAGCAAGTGGAGAGGAGCCGCGTGGACCCCACCACGCTCATCATCACCTACGCCTGCGATCACAACCATCCGATCCCATCCAAATCGGCCACGTCAGCACCCGCCACGTCAATCGAGGAGCCCGCCGCGAAATCGGACGACGAGGAGGAGGAGGAGGAAGGAGAGGAGGCCGTCGCGGCGTTCTCCGGCGGC…
Maker00013013	BnGWRKY18	Group Ⅱc	chr4	17167611	17170490	+	401	43911.8	6.7	WRKYGQK	C-X4-C-X23-H-X-H	nucleus	-0.930673	MSNNDNIHQDPSGDPYRPYDPFNYNSFSFLSHMSSSSAVYSSHLSLPAPDHHDHHHSSFDPTANNASYNLMSYTDSLHGSMDHYNTLSRAFDISCASSSDVVSPQLPDPSAAAAPAAAAASTNHVDSAKEAAAAAAAPGPAGVGDQSAGTSENPSTANSSISCSSNEGAAGAAGGEEDSGKSKKSEDDSKRGTTKGHQSIDEQDHDQDKPSKKVTKAKKKEKRPREPRFAFLTKSEIDHLEDGYRWRKYGQKAVKNSPYPRSYYRCTTQKCTVKKRVERSFQDPAIVITTYEGQHNHHCPATLRGSAAAMLSPSLFASTAASMGPTLPHEFFTQFLPLNNHHHHHHHHNNNHINHHNHHQGEPSSVLYSNLAHQYRQQLQVPDFGLLQDLVPPFSRHKQ…	ATGTCAAACAATGACAATATTCATCAAGATCCAAGTGGCGATCCATACCGGCCGTACGACCCTTTCAACTACAACTCCTTCTCATTCCTCAGCCACATGAGCTCGTCCTCGGCGGTGTACAGCAGCCACCTGAGCCTCCCCGCACCGGATCACCACGATCACCACCACAGCAGCTTCGATCCGACGGCCAACAACGCCTCCTACAACCTGATGAGCTACACCGACAGCTTGCACGGCTCCATGGACCACTACAACACCCTCTCCCGGGCCTTCGACATCTCCTGCGCCTCCTCCTCCGACGTCGTTTCCCCGCAATTACCCGACCCCTCCGCCGCCGCCGCCCCCGCCGCCGCCGCTGCTAGCACTAACCACGTTGATTCCGCCAAGGAGGCGGCCGCT…
Maker00000768	BnGWRKY19	Group Ⅰ	chr4	23187294	23191392	-	496	53391.9	8.48	WRKYGQK, WRKYGQK	C-X4-C-X23-H-X-H, C-X4-C-X22-H-X-H	nucleus	-0.789718	MAKNEDPERFSFTGGSVPAAAARPTITLPARPSMDAFFSVGGAGVSPGPLTLVSRFFSEGTPDSDQRSFTQLLAGAIASPLARPPPPLSFGLDAHAGDVFAAASKGDKDSSTVGFKQGRPLNLVVANSPSLFMMSPGLSSSGLLNSPGFFSPPSPFGMSHQQALAQVTAQAAFAQSHMPLHVEYPASTEAQQTRALDPSNVKSEPLQHQQAVPSTSDRRSSAVESSGGSQNDRRYQAPSHATDKPQDDGYNWRKYGQKQVKGSEFPRSYYKCTHLNCPVKKKVERSPDGQITEIIYKGQHNHEMPQSGKRAKDGGDPNGIANFHVKSENRAGNLQMSNGTALSQPTLNQDSAQGAPRQVPGSSDSEELVDGEAREDDADGDEPNAKRRNIEVGPSEVSL…	ATGGCGAAGAACGAAGACCCTGAGAGGTTTTCCTTCACCGGAGGATCAGTGCCGGCGGCGGCGGCGAGGCCGACGATAACGCTGCCGGCTCGGCCGTCGATGGACGCGTTCTTCTCCGTCGGCGGGGCCGGAGTGAGCCCGGGGCCGTTGACTCTGGTCTCGCGGTTCTTCTCTGAGGGCACGCCCGATTCGGACCAGAGGTCGTTCACTCAGCTCCTCGCCGGAGCCATTGCGTCGCCGCTGGCAAGGCCGCCGCCGCCGCTGAGCTTCGGCCTCGACGCTCACGCCGGCGATGTCTTCGCGGCGGCGTCGAAAGGGGACAAGGACTCGTCCACGGTGGGGTTTAAGCAGGGAAGGCCGTTGAACTTGGTGGTGGCGAACTCGCCGTCGCTGTTCATG…
Maker00000056	BnGWRKY20	Group Ⅱb	chr4	23579130	23581781	-	558	61330.8	6.84	WRKYGQK	C-X5-C-X23-H-X-H	nucleus	-0.759677	MPNSYQSTDIEEKIRVESLIISHQKANPSTQVLTKAKELEEAKAEMGEVREENERLKTVLQHIKNDYKSLQLRFFDIIKQDQSENLHDLQKPSTESQEKINSSPNNRSRQNEEAELVSLSLGRSSTPRDDQAKNLSTDQKNYDHDKGLKADDLTLGLGSETKMSTEVIASDESAENSSEDQAKELTEFPKKNSNMRNDNDEVSHDQQSQAAKRARVCVRARCDTPTMNDGCQWRKYGQKIAKGNPCPRAYYRCTVAPSCPVRKQVQRCAEDMSILITTYEGAHNHPLPVTATAMASTTSAAASMLLSGSSTSPEHTTSRFTPINPSKNNSPTSTTLINNNGLNSSHFDTNFNLRPKPFYLPNNNSLSSTLFPTITLDLTASPISQSSSSHFMSKSSSLS…	ATGCCCAACTCTTATCAAAGCACAGATATTGAAGAAAAGATAAGAGTTGAGTCCTTGATAATATCCCATCAAAAGGCCAATCCAAGTACTCAAGTATTGACAAAGGCAAAGGAGCTTGAAGAAGCGAAAGCCGAAATGGGCGAGGTAAGAGAAGAAAACGAGAGACTAAAGACGGTGTTGCAACACATCAAGAATGATTACAAGTCTCTCCAACTGCGCTTCTTCGACATCATCAAACAAGACCAATCAGAAAATCTTCATGATCTCCAAAAACCTAGCACAGAGTCACAAGAGAAGATCAACTCATCTCCGAACAATCGAAGCCGTCAAAACGAAGAAGCCGAGCTTGTGTCTCTCTCCCTGGGAAGGAGTAGTACTCCAAGAGATGATCAAGCTAAA…
Maker00000445	BnGWRKY21	Group Ⅱc	chr4	25697788	25698198	-	136	15488.2	9.76	WRKYGQK	NA	nucleus	-1.0875	MSTANLSAYPVSSNMISQANFSTGFGHGHDDHDHKRISPNHVAIRINGTDDHDNNHAMINKFEQYRSNLQEGEISAELITKNSGTNITGKINKKGEKKIRKPKYAFQTRSQVDILDDGYRWRKYGQKAVKNNKFPR	ATGTCAACGGCAAATCTCTCAGCCTATCCTGTCTCATCCAACATGATCTCTCAAGCTAATTTCAGTACTGGCTTTGGTCATGGTCATGATGATCATGATCATAAGCGAATTAGTCCAAACCATGTCGCGATTAGAATTAATGGAACTGATGATCATGACAATAATCATGCGATGATCAACAAGTTTGAGCAGTACCGTTCTAATTTGCAGGAGGGTGAGATTAGTGCTGAATTAATTACTAAAAATTCAGGCACTAATATTACCGGGAAGATTAATAAGAAAGGAGAGAAGAAGATTAGGAAGCCCAAATACGCTTTCCAAACAAGAAGTCAGGTTGACATACTTGATGATGGTTATCGTTGGAGGAAGTATGGCCAGAAGGCTGTCAAAAACAACAAA…
Maker00077582	BnGWRKY22	Group Ⅱc	chr5	740891	742293	-	144	16690.1	10.02	WRKYGQK	C-X4-C-X23-H-X-H	nucleus	-0.811806	MITIISPWHHQVCLSIRPKNVGSHEVDHKISGSENKANKIPAMSRKKKSAPQRIAFHTRTDNDVLDDGFRWRKYGQKTVKNSNHPRSYYRCSHHTCSVKKQIQRLSKDSSIVVTTYEGIHNHPSESLMESLNPLLKQLQFFTRI	ATGATAACAATTATAAGCCCTTGGCATCACCAAGTGTGTCTATCAATAAGGCCGAAAAATGTTGGAAGCCATGAAGTTGATCATAAGATTAGTGGAAGTGAAAACAAAGCAAATAAAATTCCAGCCATGAGCAGGAAGAAGAAATCAGCTCCTCAAAGGATTGCATTTCATACGAGGACCGACAACGACGTTCTAGATGACGGATTCAGGTGGCGAAAATACGGCCAAAAAACTGTTAAGAACAGCAATCATCCAAGGAGCTACTACCGTTGCTCCCATCATACTTGCAGTGTGAAGAAACAGATCCAACGGCTGTCGAAGGACTCGAGCATCGTGGTGACGACGTACGAAGGCATCCATAACCATCCTTCTGAAAGCTTAATGGAGAGCTTAAATCCA…
Maker00077681	BnGWRKY23	Group Ⅱe	chr5	751988	753793	-	368	40713.6	5.12	WRKYGQK	C-X5-C-X23-H-X-H	nucleus	-0.744293	MEDWDLLAVVRGRNNNMEFPISTNTTTNINNIITNMESPSSNCFFPLSVQDQDDLFHTYPHLFETTTAFDELEDLYKPFYPATAATAIFNAPSSSLSSPSSSSVLTSLASLPKQAEIQASPKPKIAKEPATKYKKRKNQVKRVVKEVKEDGLSSDVWAWRKYGQKPIKGSPYPRSYYRCSSSKGCSARKQVERSPSNPDIFIITYTAEHSHAHPTRRNSLAGSTRSKFPSSAAAPKPAPGGQLADHQVDSTNKSDNSDTMDCSSSKDHDGADHEVAQNESVKMEHDIDQLDGDSTSAEIDMKNHVALGHENNSQFFASLDDLERGLEELDEETSTSGLFEGGFFDDQFNISDANWFIDHYNTTVTGAC	ATGGAAGATTGGGATTTGCTGGCTGTGGTGAGAGGACGCAACAACAACATGGAATTTCCCATATCTACCAACACAACTACCAATATCAACAACATCATTACCAATATGGAATCACCAAGCTCTAATTGCTTCTTCCCTTTGAGCGTCCAAGACCAAGATGACCTCTTCCACACTTACCCTCACCTCTTCGAAACCACCACGGCTTTCGACGAGTTGGAGGACCTCTACAAGCCCTTCTACCCCGCCACCGCCGCCACCGCAATCTTCAACGCTCCTTCTTCTTCTCTCTCCTCTCCGTCGTCGAGCTCCGTCCTCACCTCTCTCGCGTCTCTTCCTAAACAAGCCGAGATCCAAGCCTCACCCAAGCCGAAAATCGCCAAAGAACCCGCCACCAAGTAT…
Maker00077507	BnGWRKY24	Group Ⅱe	chr5	2697140	2699441	+	363	40520.3	9.47	WRKYGQK	C-X5-C-X23-H-X-H	nucleus	-0.514601	MWQWLSLNLFCLLSHRTVFIAMAKASGLCLSISPRWDFKVHEAAQSSLERANRFFSCVSDEKQEKSVQELSLVAKEAVDGFKKLLLLLDEPKPSDDQKRIRKGPLPKTRDVNPSELMDSPNSSLKNMTSNSSQPFVVRQFLPPQSNHQSPITSALVQRNSLIGLSGEKQNPVLQPCYYSGQTSSTVILPGNSMAGLSHFSQQPSNSMISMNGSSVSMHAIHYTSSELLASDRASSSMFSSQMKCGAKSDNTDPRCVASTGGCHCSKRRKMRIKRSIRVPSVSNKLADIPTDDYSWRKYGQKPIKGSPYPRSYYKCSSMKGCPARKHVERCLEDASMLIVTYEGDHNHSRLTFHPPNLMIQVQH	ATGTGGCAGTGGTTGTCACTGAACTTGTTTTGTCTATTGTCACACAGAACAGTCTTCATTGCTATGGCAAAGGCTTCAGGGTTGTGCCTTTCAATATCTCCAAGATGGGATTTCAAAGTTCATGAGGCTGCTCAGAGCAGCCTTGAGAGAGCCAACAGGTTTTTCAGTTGTGTCTCTGATGAGAAGCAAGAGAAGAGTGTTCAAGAACTAAGTCTAGTTGCTAAAGAGGCCGTTGATGGATTCAAAAAGCTTCTTCTTCTTCTTGATGAACCAAAGCCATCAGATGATCAAAAGAGGATCAGAAAAGGTCCTTTGCCTAAAACCCGTGATGTGAATCCTTCCGAATTGATGGATTCTCCGAATTCTTCACTCAAAAACATGACATCCAATTCCTCTCAA…
Maker00003346	BnGWRKY25	Group Ⅲ	chr5	3941968	3944116	-	341	37868.1	5.24	WRKYGQK	C-X7-C-X23-H-X-C	nucleus	-0.555718	MYMASSNSCSLTENVPSSDLQKAMIIDELVQGRELATQLRALLAGAGESSDSAAEISAGDLVSRIMTSFTNTIILLDRNDAVKDENEAMSSLDARKSEDSEESNCRSALSPARAPKDRRGSYKRRKSSFTQIKDTATEINDGHAWRKYGQKKILKAKHPRNYFRCTHKYDQHCLATKDVQRIQDDPPLFRTTYYGQHTCRSLPSAPELVLDCTIPAHNSSAVLLSFNTANNTDLNNLATKHPFFSPPFNSITPHVVKQEYFGGEILAADIVPYGNSAMNKAQLDQSDPISTDYLRDDDADLRFGQSVLSPNFESDIQEDVLSEGIIGMGSFEDDVLQHLNF	ATGTATATGGCTTCTTCTAATTCTTGTTCTCTGACGGAAAATGTGCCCTCCTCAGACCTGCAAAAGGCGATGATCATCGACGAGCTCGTTCAGGGCCGAGAGCTCGCGACCCAGCTGCGAGCTCTGCTCGCCGGCGCCGGCGAGAGCTCGGACTCGGCGGCGGAGATCTCCGCCGGAGATCTGGTGTCGAGGATAATGACGAGCTTCACGAACACCATCATCCTGCTGGACCGAAACGACGCCGTCAAGGACGAAAACGAAGCGATGAGCTCCCTGGACGCTCGGAAGTCGGAGGATTCCGAGGAGAGCAACTGCCGGAGCGCCTTGTCGCCGGCGAGGGCTCCGAAGGATCGCCGAGGGAGCTACAAGAGGAGGAAGAGCTCGTTTACACAGATAAAA…
Maker00016870	BnGWRKY26	Group Ⅱc	chr5	10051882	10054416	+	306	34264.1	5.78	WRKYGQK	C-X4-C-X23-H-X-H	nucleus	-0.796078	MEEEVVTSTNWASLDQYGSEEELVRELLDDVSPLFLVQDESSSEELIKNNSTVMSSSSNDDHINYHDHRESGDVNYNYRLNPAVYSGPTIEDIENALTVTARKIQPQARISILEKGLSKIENKYTLKIKSCGNGMGDDGYKWRKYGQKSIKNSPNPRSYYRCTNPRCSAKKQVERSMDDPDTLIITYEGLHLHFTYPFLILGQAHEAHQAAKKPKKKTTEPEAQQQSPQVMGPTELVSPSQEERGSQGLLQDMVPLMILNPSSKTSSHSSCSSHHSPPSPTSPSSLSWPPNHYTSCFDIGINSSIR	ATGGAGGAAGAAGTAGTAACGAGCACAAATTGGGCCTCGTTAGATCAATATGGCTCGGAAGAGGAGCTTGTGAGAGAGCTTTTGGATGACGTGTCACCCTTGTTTTTGGTTCAAGACGAGTCATCATCAGAGGAATTAATCAAGAACAATAGTACTGTCATGAGTTCGTCTTCTAATGATGATCATATTAATTATCATGATCATCGAGAAAGTGGCGATGTTAATTACAATTACAGGCTCAACCCTGCCGTGTATTCAGGGCCAACAATTGAAGATATTGAGAATGCTTTGACAGTCACTGCGAGGAAAATCCAACCCCAAGCCAGGATTTCAATATTGGAAAAAGGACTAAGTAAGATTGAGAACAAATATACATTGAAAATCAAAAGCTGTGGCAAT…
Maker00070084	BnGWRKY27	Group Ⅲ	chr5	16834135	16835825	+	373	42067.4	5.2	WRKYGQK	C-X7-C-X23-H-X-C	nucleus	-0.779357	MEGSFSWEQKTLIGELIQGMELAKQLRQNLSAKASPETREFLVQRILSSYEKALLILKWSGSMGHPHQPQVQQQQQQQQQQQQQRTLGVVTSLPVPESPISFTESPRCEDQEFVRDGSKKRKALPRWTDQVRVSSENGLEGPQDDGYSWRKYGQKDILGAKYPRSYYRCTFRNTQSCWATKQVQRSDDDPFLFDITYRGSHTCSQAGNSVQPPTSPQNQDQKPNSDNGVVQHQQFESLGPNFPSNLRVVTEGLQMTEVGTSSFSFPPSQYTCLKTEDGFNSPMGLENENFLGSFSQSFMPPATPESSYYAVSPFQINNSVGFHHSVRRSESDLTEIISANTSATNSPIPELDFSLDQVEIDPNFPFDTPGFFS	ATGGAGGGAAGTTTTAGCTGGGAACAGAAGACGCTGATTGGCGAGCTGATTCAGGGCATGGAATTGGCGAAACAGCTGAGGCAGAATCTGAGTGCAAAGGCCTCGCCAGAGACAAGGGAATTCTTGGTTCAGAGGATATTGTCTTCTTATGAGAAGGCTCTATTGATTCTCAAATGGAGTGGCTCAATGGGACACCCACATCAGCCACAAGTGCAGCAACAACAACAACAGCAACAACAGCAGCAACAGCAGCGAACCCTCGGCGTGGTGACTAGTTTGCCCGTGCCGGAGTCTCCGATTTCATTCACCGAGAGCCCTCGGTGCGAGGATCAGGAATTCGTGAGAGATGGCTCAAAGAAGAGAAAGGCATTGCCAAGGTGGACTGACCAAGTAAGAGTT…
Maker00070435	BnGWRKY28	Group Ⅰ	chr5	17526344	17529317	+	553	61413.6	6.34	WRKYGQK, WRKYGQK	C-X4-C-X23-H-X-H, C-X4-C-X22-H-X-H	nucleus	-1.01935	MTFSFTDLLANNTTSTNMDNTNVGQTSWGYSDQNGNEIRNFKTLQPISINPSSSFFANNNNNNNNNSSSVPFSPTDFLNSPIFLSASNALPSPTTGAFLGQTFDWTSNSKDNSSNNKNQEIEDEDKFFADFSFQPQTGSSSATSSFIFQSSANTVSVVEQQQQQQQSWDFNKPKNETTSFSVLEKQEVKSEYPSNSRDQSQYSQTHYQYVREQKSEDGYNWRKYGQKQVKGSENPRSYYKCTNPNCPMKKKVERSLDGQITEIVYKGSHNHPKPQSTRRSSSGSINQVSSYANSDHSGHTLSNAVPEESSESIGEDGFDRNSPTFVSGGDNDDNEPESKRWKGDNENEVFSASGNRTVKEPRVVVQTTSEIDILDDGYRWRKYGQKVVKGNPNPRSYYK…	ATGACTTTTTCTTTCACTGACCTCCTCGCAAACAACACCACCAGTACAAACATGGACAACACTAACGTTGGCCAAACAAGCTGGGGATATTCAGACCAAAATGGAAATGAAATCAGAAACTTCAAGACCCTTCAACCTATTTCCATCAATCCTAGCTCTTCATTTTTTGCCAACAATAACAACAACAACAACAACAACTCTTCTTCTGTGCCCTTTAGCCCAACTGATTTCTTGAACTCTCCAATTTTCCTCTCTGCTTCTAATGCTCTTCCATCTCCTACAACCGGGGCTTTTCTTGGTCAAACCTTTGACTGGACAAGTAATTCCAAGGACAACAGTAGCAACAACAAGAATCAGGAAATTGAAGATGAGGACAAGTTTTTCGCTGATTTTTCATTC…
Maker00083407	BnGWRKY29	Group Ⅲ	chr5	20700179	20704263	+	369	41583	5.2	WRKYGQK	C-X7-C-X23-H-X-C	nucleus	-0.742818	MEGSFSWEQKTLIGELIQGMELAKQLRQNLSAKASPETREFLVQRILSSYEKALLILKWSGSMGHPHQPQVQQQQQQQQQRTLGVVTSLPVPESPISFTESPRCEDQEFVRDGSKKRKTLPRWTDQVRVSSENGLEGPQDDGYSWRKYGQKDILGAKYPRSYYRCTFRNTQSCWATKQVQRSDDDPFLFDITYRGSHTCSQAGNSVQPPTSPQNQDQKPNSDNGVVQHQQFESLGPNFPSNLRVVSEGLQMTEVGTSSFSFPPSQYTCLKIEDGFNSPMGLENENFLGSFSQSFMPPATPESSYYAVSPFQINNSVGFHHSVRRSESDLTEIISANTSATNSPIPELDFSLDQVEIDPNFPFDTPGFFS	ATGGAGGGAAGTTTTAGCTGGGAACAGAAGACGCTGATTGGCGAGCTGATTCAAGGCATGGAATTGGCGAAACAGCTGAGGCAGAATCTGAGTGCAAAGGCCTCGCCAGAGACAAGGGAATTCTTGGTTCAGAGGATATTGTCTTCTTATGAGAAGGCTCTATTGATTCTCAAATGGAGTGGCTCAATGGGACACCCACATCAGCCACAAGTGCAGCAACAACAACAGCAACAACAGCAGCGAACCCTCGGCGTGGTGACTAGTTTGCCCGTGCCGGAGTCTCCGATTTCATTCACCGAGAGCCCTCGGTGCGAGGATCAGGAATTCGTGAGAGATGGCTCAAAGAAGAGAAAGACATTGCCAAGGTGGACTGACCAAGTAAGAGTTAGCTCAGAGAAT…
Maker00006282	BnGWRKY30	Group Ⅱc	chr6	1155562	1158866	-	382	42737.3	7	WRKYGQK	C-X4-C-X23-H-X-H	nucleus	-0.787173	MEIKREMITTTTTKLGMGSSNGAFNNTNSPLLVSTSSTFDHLCEFGDKSSLGFMELLGVNDYLLTANTTPTTSQTLSFFDHQYHSFPSLQTPLLVDHLASSNIITANDNIAVKIRHQTQSNIINNQPETPNTSSISSASSDDQQVNVKTQQDEEDDHDDKDHDQDEEHANEKTKKLLKAKKTNQKNRQREPRFAFMTKSEVDHLEDGYRWRKYGQKAVKNSPFPRSYYRCTSSSCNVKKRVERSFTDPTVVVTTYEGQHTHPSPLISRPPNSLLRASSPPPPTPFPTSTNAHMPRQYYYHQFLSPNVNLQLLQHQHLAEYALSSSSSSSSLLGSNNLNGSSTSNNGFGVNERRFCTATGTANLLVDHGLLQDIVPSHMLKQK	ATGGAGATCAAGAGAGAAATGATCACAACAACAACTACAAAGCTGGGCATGGGATCGTCAAACGGTGCGTTTAACAACACCAACAGTCCATTATTGGTCTCAACATCATCAACGTTTGACCATCTTTGTGAGTTCGGAGACAAGAGCTCTCTAGGGTTTATGGAGCTTCTCGGAGTCAACGACTACTTGCTCACAGCCAATACCACACCAACGACATCTCAAACTCTGTCGTTTTTTGATCATCAGTACCACAGTTTCCCATCCCTTCAAACACCACTATTAGTAGATCACTTAGCTTCGAGCAATATCATTACCGCTAATGATAATATTGCTGTGAAAATTCGTCATCAGACTCAGAGTAATATTATAAATAATCAGCCTGAGACGCCAAATACTTCG…
Maker00039158	BnGWRKY31	Group Ⅱe	chr6	1498428	1499991	-	170	19003.7	9.19	WRKYGQK	NA	nucleus	-0.759412	MDIGSLSPKNSEVSKNQQPSKKRKVVEKTVIKVKIGTNVGKLLKNECPPSDSWSWRKYGQKPIKGSPYPRGYYRCSTSKGCSAKKQKTCCDGDTNKLGLEVDKLEPPLIISGQTQKQPMCNFSSSSSSDQEISDFFDELEELPMYSNFTSLIMRTNLSNEIRNTIPIVPS	ATGGATATTGGTTCTCTCTCTCCCAAAAACTCGGAGGTTTCAAAAAATCAGCAGCCCTCCAAAAAAAGGAAGGTTGTAGAGAAGACTGTTATTAAAGTGAAGATAGGAACAAATGTAGGGAAATTACTTAAGAATGAATGCCCTCCTTCTGATTCTTGGTCTTGGAGAAAGTATGGCCAAAAGCCCATTAAAGGCTCTCCTTATCCAAGGGGCTATTACAGGTGTAGTACTTCAAAGGGTTGCTCAGCAAAGAAACAAAAAACATGTTGTGATGGGGACACTAATAAGCTTGGTTTAGAGGTGGACAAATTAGAGCCACCATTGATAATCTCAGGCCAAACACAAAAACAGCCCATGTGTAACTTCTCATCATCATCATCGTCTGATCAAGAAATTAGC…
Maker00084561	BnGWRKY32	Group Ⅱe	chr6	9552879	9555155	+	418	43971.5	6.05	WRKYGQK	C-X5-C-X23-H-X-H	nucleus	-0.660526	MDDDWGLHAVVRGCSAAFSPATSASSAATSAATTTTQTTSPFMADFQPFNIHHHSSNNNNSSFLFSSSSSSSSSSFGNIGQSGSSSSSGYSQLFSLSASSSSDLATMMRPSSRSSLSHGHVNAVEDLHDLYRPFFTKPESTNNISQLATTPNSSGSIVISSFSRSNNSSSDQRSVQQQQQMKHNSSNNNAKPLSHSGSASATTPRSKKRKNQLKKVCQVPAESLSSDIWAWRKYGQKPIKGSPYPRGYYRCSSSKGCLARKQVERNRSDPGMFIVTYTAEHNHPAPTHRNSLAGSTRQKPSLSSASASVSGEPANPSEPAKPSSPATSPEEDPAAAAQAQSGSATESKEGPESSTLLMDDDEDDDEFGFSDMAVSDDFFVGLEGLGAPETGEFFSDNFP…	ATGGACGACGATTGGGGCCTCCACGCCGTCGTCAGGGGCTGCTCCGCCGCCTTCTCCCCCGCCACGTCAGCTTCCTCCGCCGCCACGTCAGCAGCGACAACGACCACGCAAACAACGAGCCCTTTCATGGCCGACTTTCAACCTTTCAATATTCACCACCACAGCAGCAACAACAACAATAGCTCGTTTCTCTTCTCTTCTTCTTCTTCTTCGTCTTCGTCTTCGTTTGGCAATATTGGTCAAAGCGGTTCGAGTTCAAGCTCCGGCTACAGTCAACTCTTCTCTCTCTCGGCCTCTTCTTCCTCAGATCTCGCCACCATGATGAGACCTTCCTCGAGATCAAGCCTTAGCCACGGCCATGTCAACGCAGTGGAAGACCTTCACGACCTTTACAGGCCT…
Maker00080492	BnGWRKY33	Group Ⅱd	chr6	11331842	11334008	-	225	25138.6	9.83	WRKYGQK	C-X5-C-X23-H-X-H	nucleus	-0.895111	MEEVEEANKAAVESCHRVLSLLSQPQQDQAQRRNLAAETGEAVFKFKRVVSLLNTGLGHARVRKLKKLPIPLPQSMLLDNPNCGRATDHHQSAFHLVGAPRSSDQNSQHKRKCSGRGDDGSVKCGTAGRCHCSKKRKHRVKRSIKVPAISNKLADIPQDDYSWRKYGQKPIKGSPHPRGYYKCSSMRGCPARKHVERCLEDSSMLIVTYEGEHNHPRAQSQSANT	ATGGAGGAGGTCGAAGAGGCGAATAAAGCAGCTGTGGAGAGTTGCCACAGAGTACTGAGTCTCTTGTCTCAGCCCCAACAGGATCAAGCTCAGCGTAGGAACTTAGCGGCTGAGACTGGCGAGGCTGTGTTCAAGTTCAAGCGAGTCGTTTCTCTTCTCAACACTGGTTTAGGCCACGCCAGAGTCAGGAAGCTCAAGAAACTCCCAATCCCTTTGCCTCAGAGCATGCTCTTGGACAACCCCAATTGCGGCAGAGCAACAGATCATCACCAATCTGCGTTCCATCTGGTCGGTGCTCCTCGCTCTTCGGATCAGAACTCGCAGCACAAGAGGAAATGCTCCGGCAGGGGAGATGATGGCAGCGTGAAATGTGGTACCGCCGGTAGATGTCACTGTTCG…
Maker00042305	BnGWRKY34	Group Ⅱb	chr6	18089924	18095424	+	486	53057.9	5.43	WRKYGQK	C-X5-C-X23-H-X-H	nucleus	-0.703498	LKVLHEVDKFKIKSQGEDEDEEEDKDDIGEEADKEDDEESKEEEETKGIRETKLKLVQDHDKLSVLQMEMNRMKEENKVLRRVVEQTMKEYCDLQIKFADVQQNNQNKDTLAFLSLHDIQPPPENTVLSKVLLQSNDTNHKSPSPSQESIVGESDQLGLSLRLQTGNEKQEEINKMNDGCQWRKYGQKIAKGNPCPRAYYRCTVAPGCPVRKQVQRCLEDMSILITTYEGTHNHPLPVGATAMASTASSAASASFMLVDSSSPYPDHVPSSSSTTFTQPIPNLPYNNMMMISPNHHQMLLNPMSHYSSNIRTINPNDPSRGIVLDLTSTPQSFPLPASASALLGQSSSHHHQPAGTGNNLSWIPSKFPNHASLNMAGGPLLAGARGADERVWRAGGGDE…	TTGAAGGTTCTTCATGAGGTTGACAAATTCAAGATCAAATCCCAAGGAGAAGACGAAGACGAAGAAGAGGACAAGGATGATATCGGCGAAGAGGCCGATAAAGAAGATGATGAAGAATCAAAAGAAGAAGAAGAAACAAAAGGGATCAGAGAAACAAAATTGAAACTAGTGCAAGATCATGACAAGTTATCTGTGCTTCAAATGGAGATGAACCGCATGAAGGAAGAGAACAAGGTGTTAAGGAGAGTGGTGGAACAAACAATGAAAGAGTACTGTGATCTCCAAATTAAATTTGCAGATGTCCAGCAAAATAACCAAAATAAGGACACCTTAGCCTTCCTTTCACTCCATGATATTCAACCACCACCAGAGAACACAGTGCTTTCAAAGGTCTTATTA…
Maker00064384	BnGWRKY35	Group Ⅱc	chr7	17496187	17503595	-	318	34586.8	5.74	WRKYGQK	C-X4-C-X23-H-X-H	nucleus	-0.792138	MDDDTAKPDPSRSEFAWPAGAEDDCGVFFFGSAERDSNSILGEFGWSAFHAADDYADRSELSAAASAPTEEGAEVPAAEAAADRVGSASNNPSASSSSSEEQPEKSTGSGGGVAPAETANKVKKKGQKRIRQPRFAFMTKSEVDHLEDGYRWRKYGQKAVKNSPFPRSYYRCTNSKCTVKKRVERSSDDPTVVITTYEGQHCHHTVGFPRAGIMAHHDGATALYPGQLQPPMASKFYNYPTIHQLPRSSDQNNDHISSDFANLSSTSQSNQQLLVPSEARDHSNHHVIMQESTVISTTSQVTDEGLLGDIVPPGMRNR	ATGGACGACGATACGGCCAAGCCCGATCCGTCGCGATCCGAGTTCGCCTGGCCGGCCGGCGCCGAAGACGACTGCGGCGTCTTCTTCTTCGGCTCCGCCGAGAGGGACTCCAACAGCATACTCGGCGAGTTCGGCTGGAGCGCCTTCCACGCCGCCGACGACTACGCCGATCGGAGCGAGCTCAGCGCTGCCGCCTCGGCGCCGACGGAGGAGGGCGCCGAGGTGCCGGCGGCGGAGGCCGCGGCGGATCGGGTCGGATCTGCGTCGAACAACCCGTCGGCGTCGTCGAGCTCGAGCGAGGAACAGCCGGAGAAGTCCACCGGCTCCGGCGGCGGAGTTGCGCCGGCTGAGACAGCAAATAAGGTAAAAAAGAAAGGGCAGAAGCGAATTCGACAGCCC…
Maker00064771	BnGWRKY36	Group Ⅰ	chr7	17644155	17647467	+	479	52116.8	6.69	WRKYGQK, WRKYGQK	C-X4-C-X23-H-X-H, C-X4-C-X22-H-X-H	nucleus	-1.019	MAENEAQSSSEPSNSKPPPPPQASRPTITPPPRASFEALLNGGPGFSPGPMTLVSSFFADAGDDDCKSFSQLLAGAITSPPTARPADFWLPSPGILSPGQGPFGMSHQQVLAQVTAQAAQANSNSNAQSETDYLSSLSASPGASFAPQLQAFSPNSASQQEMPSLVPASGGVAVEESSDASHQDLNSRSSSFNADRPNDDGYNWRKYGQKQVKGSEFPRSYYKCTSPNCPVKKKVERSLDGQVTEIIYKGQHNHQRPHSNKRGKDVGNSNSNPYGRANHDLASQVQSGHFNKSKEGTTSYSMSRKDQESSQATHEQISGTSDSEDVGEAEVGLEEKGDEDEPEQKRRNVEPAPSHRTVTEPRIIVQTTSEVDLLDDGYRWRKYGQKVVKGNPYPRSYYK…	ATGGCTGAGAACGAAGCACAGAGCTCATCAGAGCCGTCCAACTCCAAGCCGCCGCCGCCGCCGCAGGCGAGCCGCCCCACCATCACTCCGCCGCCGCGGGCCTCCTTCGAAGCTCTCCTCAACGGCGGGCCCGGGTTCAGCCCGGGGCCCATGACTCTGGTGTCCAGCTTCTTCGCCGACGCCGGTGACGACGACTGCAAGTCCTTCTCCCAGCTCCTCGCCGGCGCCATCACCTCGCCGCCGACAGCCAGGCCCGCCGACTTCTGGCTGCCCTCTCCGGGGATTTTGTCGCCTGGTCAGGGACCGTTTGGAATGAGTCACCAGCAGGTTCTGGCTCAAGTAACGGCTCAGGCTGCGCAAGCGAATTCGAATTCGAATGCGCAAAGCGAAACCGATTAC…
Maker00064087	BnGWRKY37	Group Ⅱb	chr7	18539254	18544253	-	601	65618	6.16	WRKYGQK	C-X5-C-X23-H-X-H	nucleus	-0.843594	MENKNSEKKPIVGSNKVKLQDEETTVSDIVIIDDKEDNCKGIRNNGCQNISEDQIKNDLKQPNSPSGKNLAINIKQEDNKLKYSATLAEMEKVREENERLKFLLARILKDYQSLQSHFFDLIRNQEANNNKDETKITNPKDQTTTSPNSDHHDDHDHGDHHQLLVSLSLGRTSSSSGTINDHDDHHEPTRKSVDQKKITKDHDDHDHDQHRGEGFDKLALALGQSSADDNGAFDDDQDRRNDNDGEAGPAAEMWPPSKALKAAPRPSGDDHEDGASQMSPLKKARVSVRARCDTPTMNDGCQWRKYGQKISKGNPCPRAYYRCTVSQSCPVRKQVQRCSEDMSILITTYEGTHNHPLPISATAMASTTAAAASMLQSRSTASAAADSQPAGPFLATSSS…	ATGGAAAACAAAAATTCGGAGAAAAAACCTATTGTTGGTTCTAATAAGGTTAAGCTTCAAGATGAGGAAACAACGGTTTCGGATATTGTAATTATCGACGACAAAGAAGATAATTGCAAGGGAATTAGGAATAATGGGTGTCAAAATATTAGCGAAGATCAGATCAAAAATGATTTGAAGCAGCCAAATTCACCTAGTGGAAAGAATTTAGCCATTAATATCAAACAGGAGGATAACAAGCTGAAATATTCGGCGACATTAGCCGAAATGGAAAAGGTTAGAGAAGAGAACGAAAGACTGAAATTCCTTTTGGCTCGAATCTTGAAGGACTATCAATCTCTTCAATCTCATTTCTTTGATCTTATTAGAAACCAAGAAGCTAATAACAATAAAGACGAG…
Maker00078039	BnGWRKY38	Group Ⅰ	chr8	349716	355692	+	735	79453.5	5.9	WRKYGQK, WRKYGQK	C-X4-C-X23-H-X-H, C-X4-C-X22-H-X-H	nucleus	-0.728163	MAGFDDNFAVMGDWTSLSPSPRAFFSSVLGDDIASKPLSESGPCNAPHTDELFPRPPPTAPTPKNTTSQLSDSGNDNQPPQFGSFCGQKSSLHGGLLERIAARAGFNAPRLNTESIRSSDLSVASDTPSPYLTISPGLSPTTLLDSPVFLSNSLAQPSPTTGKFPFVPNGNCRISSSMLEANDKTKDNSFQDTNTSSFAFKPLAKPGSSFFIGEASKVVPQKPFPSIEVPVQSENSPQSPEATTVENQSKNNFQFQADFSRESVQKDDGINSISTEQKTFDNANVGGSAEHSPLLEEQPDEEGDHHGGGGGTTSDDGYNWRKYGQKQVKGSEYPRSYYKCTHLNCQVKKKVERSHEGHITEIIYKGAHNHPKPPNRRSAVGSSNLLIEMRMDIPEQAGL…	ATGGCCGGTTTCGATGATAATTTTGCTGTAATGGGAGATTGGACGTCTCTTAGTCCCAGCCCAAGAGCTTTCTTCTCATCAGTTTTGGGTGACGATATCGCCTCTAAACCACTTTCAGAGTCAGGGCCTTGTAATGCTCCCCACACAGATGAGCTCTTTCCACGACCTCCGCCCACGGCACCGACACCCAAAAATACTACCTCTCAACTCTCTGATTCTGGCAACGACAACCAACCGCCTCAATTCGGATCCTTTTGTGGGCAAAAATCAAGCTTACATGGAGGACTACTGGAAAGGATCGCCGCTCGAGCTGGATTTAATGCTCCGCGCTTGAACACTGAAAGTATTAGATCGTCCGACCTTTCTGTGGCTTCCGACACTCCATCTCCTTATCTGACC…
Maker00092999	BnGWRKY39	Group Ⅰ	chr8	4977349	4983313	-	735	79395.4	5.9	WRKYGQK, WRKYGQK	C-X4-C-X23-H-X-H, C-X4-C-X22-H-X-H	nucleus	-0.742857	MAGFDDNFAVMGDWTSLSPSPRAFFSSVLGDDIASKPLSESGPCNAPHTDELFPRPPPTAPTPKNTTSQLSDSGNDNQPPQFGSFCGQKSSLHGGLLERIAARAGFNAPRLNTESIRSSDLSVASDTPSPYLTISPGLSPTTLLDSPVFLSNSLAQPSPTTGKFPFVPNGNCRISSSMLEANDKTKDNSFQDTNTSSFAFKPLAKPGSSFFIGEASKVVPQKPFPSIEVPVQSENSPQSPEATTVENQSKNNFQFQADFSRESVQKDDGINSISTEQKTFDNANVGGSAEHSPLLEEQPDEEGDHHGGGGGTTSDDGYNWRKYGQKQVKGSEYPRSYYKCTHLNCQVKKKVERSHEGHITEIIYKGAHNHPKPPNRRSAVGSSNLLIEMRMDIPEQAGL…	ATGGCCGGTTTCGATGATAATTTTGCTGTAATGGGAGATTGGACGTCTCTTAGTCCCAGCCCAAGAGCTTTCTTCTCATCAGTTTTGGGTGACGATATCGCCTCTAAACCACTTTCAGAGTCAGGGCCTTGTAATGCTCCCCACACAGATGAGCTCTTTCCACGACCTCCGCCCACGGCACCGACACCCAAAAATACTACCTCTCAACTCTCTGATTCTGGCAACGACAACCAACCGCCTCAATTCGGATCCTTTTGTGGACAAAAATCAAGCTTACATGGAGGACTACTGGAAAGGATCGCCGCTCGAGCTGGATTTAATGCTCCGCGCTTGAACACTGAAAGTATTAGATCCTCCGACCTTTCTGTGGCTTCCGACACTCCATCTCCTTATCTGACC…
Maker00013927	BnGWRKY40	Group Ⅲ	chr8	10776003	10779491	-	357	40103.6	5.61	WRKYGQK	C-X7-C-X23-H-X-C	nucleus	-0.759384	MEKSMENFEPKTLIHELSQGKELAKKLMSHLQPSSSQETRDLLLEQILSSYEKVLSMLNHTKNKKESNSLESTHSLGHTTSPRSVISDQQSTPRDVFKKRKTMPRWTEQVKVCLGTGPEGPLDDGYNWRKYGQKDILGANHPRGYYRCTHRNSQGCLATKQVQKSDEDPSLFEVTYRGRHTCSRSSQLSNIASNPQSQFKQEKKVHNFPQQQEEENQTQSQSALLNLKAGLGVKTEDLDTREDSMIFPPFSFPPTPIEPDTVDTPFLPDAAIVEGSLVCGFSPRFLSPATSDSNYFAASPWHDFGTFGQCNSSESDHAEILSARTSVTNSPIGDLDLTIDKLDFELSFPFDSPEFFA	ATGGAAAAGAGCATGGAAAATTTTGAGCCGAAGACTCTGATCCATGAGCTAAGCCAAGGAAAAGAGCTTGCAAAGAAGCTAATGAGCCATCTTCAACCATCTTCTTCCCAAGAAACAAGGGACTTGTTGCTTGAGCAGATTTTATCTTCCTATGAAAAAGTACTCTCAATGCTCAACCACACCAAGAACAAGAAAGAGTCAAACAGCTTGGAATCAACACACTCCTTAGGCCATACAACAAGCCCAAGAAGTGTCATCTCTGACCAACAGTCTACTCCAAGAGATGTCTTCAAGAAACGGAAAACAATGCCCAGATGGACAGAGCAAGTGAAGGTGTGTTTGGGAACAGGACCAGAAGGGCCTCTTGATGATGGTTATAATTGGAGAAAGTATGGCCAA…
Maker00008224	BnGWRKY41	Group Ⅱc	chr9	116131	119532	+	456	50762.3	5.86	WRKYGQK	C-X4-C-X23-H-X-H	nucleus	-0.90636	MDKLKENMESMANPSSSSCLFSDELLNIPATFFFDEHHQKSFVDLLEIRGSAQQYHHHHHDLPCLIAPINNPSDQYDAVTCAPTTTTVTPHHHHQQQRQTASSFSLPSTPASNANPESTMTSVVTTPNSGSDVSLSSSSNDKQLQVGVDDHDLDLVVSETTTRDDHHDDDDDDDEEDQDQSCASGHKQTNSIPNNNTTTSNKQQLKAKKKNQKRQREPRFAFMTKSEVDHLDDGYRWRKYGQKAVKNSPYPRSYYRCTSGGCGVKKRVERSSDDPTTVVTTYEGQHTHPCPITPRGSIVGINIMSPPPPQYDQQQQHHQQQQGSSSGFMPTRGFCSNHFTASAAALDPQLHFHHQPYSTTNPYACSSTSTITAATSTTSPNNSLINIDHNTNIININPS…	ATGGACAAATTGAAGGAAAACATGGAGTCCATGGCAAACCCCAGCTCTTCTTCTTGCCTCTTCTCCGACGAGCTTCTCAACATTCCGGCCACTTTCTTCTTCGACGAACACCACCAAAAGAGCTTCGTGGACTTGTTGGAAATCAGAGGTAGTGCTCAACAATATCATCATCATCATCATGATTTGCCATGTCTAATCGCACCCATTAATAATCCCTCTGATCAATACGACGCCGTCACTTGTGCACCGACGACGACGACGGTGACGCCTCATCATCATCATCAGCAGCAGCGGCAAACGGCGTCGTCGTTCTCGCTGCCGTCGACGCCGGCCTCCAACGCCAACCCGGAGAGCACCATGACCAGCGTCGTCACCACTCCCAACTCCGGATCCGACGTG…
Maker00060678	BnGWRKY42	Group Ⅱc	chr9	523245	526627	-	451	50148.6	5.62	WRKYGQK	C-X4-C-X23-H-X-H	nucleus	-0.869845	MDKLKENMESMANPSSSSCLFSDELLNIPATFFFDEHHQKSFVDLLEIRGSAQQYHHHHHDLPCLIAPINNPSDQYDAVTCAPTTTTVTPHHHHQQQRQTASSFSLPSTPASNANPESTMTSVVTTPNSGSDVSLSSSSNDKQLQVGVDDHDLDLDLVVSETTTRDDHHDDDDDDDEEDQDQDQSCASGHNQTNSIPNNNTTTSNKQQLKAKKKNQKRQREPRFAFMTKSEVDHLDDGYRWRKYGQKAVKNSPYPRSYYRCTSGGCGVKKRVERSSDDPTTVVTTYEGQHTHPCPITPRGSIVGINIPPQYDHQQQQGSSSGFMPTRGFCSNNFTASAAALDLQLHFHHQPYSTTNPYACSSTSTITAATATTSPNNSLINIDHNTNIININPSSSNYF…	ATGGACAAATTGAAGGAAAACATGGAGTCCATGGCAAACCCCAGCTCTTCTTCTTGCCTCTTCTCCGACGAGCTTCTCAACATTCCGGCCACTTTCTTCTTCGACGAACACCACCAAAAGAGCTTCGTGGACTTGTTGGAAATCAGAGGTAGTGCTCAACAATATCATCATCATCATCATGATTTGCCATGTCTAATCGCACCCATTAATAATCCCTCTGATCAATACGACGCCGTCACTTGTGCACCGACGACGACGACGGTGACGCCTCATCATCATCATCAGCAGCAGCGGCAAACGGCGTCGTCGTTCTCGCTGCCGTCGACGCCGGCCTCCAACGCCAACCCGGAGAGCACCATGACCAGCGTCGTCACCACTCCCAACTCCGGATCCGACGTG…
Maker00074209	BnGWRKY43	Group Ⅱc	chr10	1649625	1651038	+	190	21380.7	8.86	WRKYGQK	C-X4-C-X23-H-X-H	nucleus	-0.858947	MENYQTHLFLASPPQTWASLGDDRGASAHFHHHHGGDVVVDSNGREVKQAVVELGVGANNYCYHGDKYCLGDESGASIEAKSGSKKGGDHKGKKRHKFAFQTRSHVDVLDDGYRWRKYGQKIVKNSKFPSRSYYKCTFNGCNVKKQIQRLCNDEGIVVTTYEGMHSHPTDKTSDNFDHILKHIQTSYSAF	ATGGAGAATTACCAAACGCATTTATTCCTGGCTTCGCCGCCACAAACATGGGCGTCGTTGGGCGATGATCGCGGTGCCTCTGCTCATTTTCATCATCATCACGGTGGCGATGTTGTTGTTGATAGCAATGGACGAGAAGTGAAACAAGCAGTGGTTGAGCTTGGTGTTGGAGCTAATAATTATTGCTACCATGGCGATAAGTACTGCTTGGGGGACGAGAGTGGGGCGTCCATTGAGGCGAAATCGGGGTCGAAGAAAGGCGGTGATCACAAGGGTAAAAAGAGGCACAAGTTTGCCTTTCAAACTAGGAGCCATGTTGATGTGCTTGATGACGGATATCGGTGGAGAAAGTATGGCCAGAAAATTGTTAAGAACAGTAAATTCCCTAGCAGAAGTTAT…
Maker00059396	BnGWRKY44	Group Ⅱb	chr10	4496601	4500862	-	673	71471.3	7.56	WRKYGQK	C-X5-C-X23-H-X-H	nucleus	-0.717533	MEAVLGRSSGHGDLIVKKEEIIKRSATESSGQDDEDCEQDFTLKIGNGRSYTEISDDDTKRSPKHKDLISNKQDNEQLESTKAEMGEVREENERLKMVLGRIMKDYKTLQMQFNNIAQQESAKKNDHQEIEDPNSSPLVSEAFPARDEKKKSPSPYNNSKEANRKQDGHDQEKLSLGLDYKYFSEASNKSGATDQGGPAGSNPSAASSFEEPKEEAGETWPPSKVLRPTAKRSGEQDEVSQAQSPVKKARVCVRARCDTPTMNDGCQWRKYGQKIAKGNPCPRAYYRCTVAPLCPVRKQVQRCADDMSILITTYEGTHNHPLPVSATAMASTTSAAASMLLSGSTTSSSSSSAARPSLTAAADALGFNTLDSSKWNTTANKAQFYLPNTSAYSSYSSSH…	ATGGAGGCTGTTTTGGGAAGATCATCTGGCCATGGAGATCTTATCGTCAAGAAAGAAGAGATAATTAAAAGATCAGCCACTGAATCTAGCGGCCAAGATGATGAAGATTGCGAACAAGATTTTACTCTAAAGATAGGGAATGGAAGATCATACACTGAGATTAGTGATGATGACACCAAACGATCACCTAAACATAAAGACCTAATCAGCAATAAGCAGGATAATGAGCAGCTTGAATCTACCAAAGCCGAGATGGGTGAGGTTAGAGAAGAGAATGAAAGACTCAAAATGGTCTTAGGCAGAATAATGAAGGACTACAAAACCCTCCAAATGCAATTCAACAACATTGCTCAACAAGAATCTGCAAAGAAGAATGATCACCAAGAAATCGAAGACCCG…
Maker00038000	BnGWRKY45	Group Ⅰ	chr11	1429236	1433949	+	515	56517.6	5.49	WRKYGQK, WRKYGQK	C-X4-C-X23-H-X-H, C-X4-C-X22-H-X-H	nucleus	-0.907573	MADEQGESSEALEMETLERNEEEEDEDEVEEDEGEEPEEGGYGGELPSPESEAGGESREAQSETLAPRFSPEVAEKDRCGGDGFQVNSTLKSNDGAKSEEQNGVLHEEVVPGADAQAENQHRSIACPTLSELSPTSVTQPISSVSSPTPVEHRLSPPKDNDLCKPKEEQQNSSARKTVTPVPALRVPSSDGYNWRKYGQKQVKSPKGSRSYYKCTYSECYAKKIECCDHSGCVTEIVYKSQHTHDPPKKTSSARENKISLAERVSGNNAVKQPCKIPKDSDLSTSVKENIHATPLLPDRKRQNLVNTDESGDTVVKEEHVNEPDHKRRHVPNEIAFFNIGSPMNRLSIIKCQLEYSDSLLKPSKKPKFVVHAAGDVGISADGYRWRKYGQKMVKGNPNP…	ATGGCTGATGAGCAAGGCGAGAGCTCTGAAGCTCTGGAAATGGAAACCCTCGAGCGGAACGAAGAAGAGGAAGACGAAGACGAAGTCGAAGAGGACGAAGGAGAGGAGCCGGAGGAAGGCGGTTATGGCGGCGAGTTGCCGAGTCCGGAATCGGAGGCCGGAGGCGAGTCGAGAGAGGCTCAATCGGAAACCCTAGCGCCGCGTTTTTCGCCGGAAGTGGCGGAGAAGGATCGCTGCGGTGGTGATGGTTTTCAGGTGAATTCTACGTTGAAGTCCAACGATGGAGCTAAATCCGAAGAGCAGAATGGGGTACTTCATGAGGAAGTTGTACCTGGTGCCGACGCTCAGGCAGAAAACCAGCATCGGTCAATTGCGTGTCCAACTTTGTCCGAATTATCG…
Maker00041241	BnGWRKY46	Group Ⅱb	chr11	16509933	16513826	+	607	65572.4	6.07	WRKYGQK	C-X5-C-X23-H-X-H	nucleus	-0.705601	MIMDPTREQEMVRGGGREGRKRVVGELDFFADRKINTDHHHHHIKSTQGHLDHGDSRNEDDREPAPRDQALLVDHQDDQQLDVNTGLCLLTTNTSSDKSTVDEGSSGNNNNVEDNKKPVLNEIAALQGELDRVNSENRQLRGMIRQANNNYHALNMQFAAMAQSKQHNQKPEIADQESNNRVMINALLEENQRNLAAGARQFIDLGRPAANVERDRGEISQSSLERRSHIPRGLSPQNEIIESMNCKSTISTSFRDQSGRSSKESDDHDQDQDRDHEASGQDDHDQQLGAAAEARWVPNKVARFNTGASNSRDEDQAASETMSMIRKARVSVRARSEAAMISDGCQWRKYGQKMAKGNPCPRAYYRCTMATGCPVRKQVQRCAEDQTILTTTYEGHHNH…	ATGATCATGGACCCCACTAGGGAGCAAGAGATGGTGAGAGGCGGCGGCCGCGAGGGCCGGAAAAGGGTGGTCGGGGAATTGGATTTCTTTGCGGATCGCAAGATTAATACTGATCATCATCATCATCATATCAAATCAACACAAGGTCATCTTGATCATGGAGATAGCCGCAATGAAGATGATCGCGAACCTGCGCCGCGAGATCAAGCGTTGTTGGTTGATCATCAGGATGATCAGCAACTTGATGTGAATACCGGTTTGTGTCTTCTTACAACAAATACTAGTAGTGATAAATCAACGGTGGATGAGGGTTCTTCTGGTAACAATAATAATGTGGAAGATAACAAGAAACCAGTTCTCAATGAGATAGCTGCTCTTCAGGGCGAATTGGACCGAGTG…
Gene.14283	BnGWRKY47	Group Ⅰ	chr11	17089492	17091174	+	457	49965.2	6.44	WRKYGQK, WRKYGQK	C-X4-C-X23-H-X-H, C-X4-C-X22-H-X-H	nucleus	-0.811597	MAVLLPNVCHLLKAITDPNYQQSMQVQGHSQPFSSIPLVKSESAVTSNELSLSAPATVAASGASAPADGDSDELNQRGHPNSGVQSAQFDQKVSGTSVISSDDGYNWRKYGQKHVKGSEFPRSYYKCTHPNCEVKKLFERSHDGQITEIIYKGTHDHPKPQPSRRYNTGNIMSVQEERSDKYSSIAGRDDKSPSIYGQTSNTNDPNGTPDLSPIATNDDSAEATGNRINDDIDDDDPFSKRRKMEIGGIDVTPVVKPIREPRVVVQTLSEVDILDDGYRWRKYGQKVVRGNPNPRSYYKCTNAGCPVRKHVERASHDPKAVITTYEGKHNHDVPTARNSSHEMAGTMSANVPARMRSEETDTISLDLGVGISSAVENRSTERLPAARPEIMDGQTHNPS…	ATGGCTGTTTTGTTACCTAATGTTTGTCATTTGTTGAAGGCTATTACAGATCCAAATTACCAACAGTCTATGCAAGTCCAAGGGCATTCTCAGCCATTTTCATCAATACCTCTAGTTAAAAGTGAGTCGGCAGTCACCTCAAATGAGTTGAGTTTATCAGCACCGGCGACTGTTGCTGCTTCAGGAGCTAGCGCACCTGCTGATGGTGATTCTGATGAATTAAACCAGAGGGGTCATCCTAATTCTGGGGTCCAATCGGCACAATTTGATCAGAAAGTAAGTGGAACTTCAGTCATATCTTCTGATGATGGGTATAATTGGAGAAAGTATGGACAAAAGCATGTGAAAGGAAGTGAATTTCCACGTAGCTATTACAAATGTACCCATCCGAATTGTGAA…
Gene.14281	BnGWRKY48	Group Ⅰ	chr11	17088891	17091174	+	507	55303.8	6.25	WRKYGQK, WRKYGQK	C-X4-C-X23-H-X-H, C-X4-C-X22-H-X-H	nucleus	-0.799803	MKFQGLFEAEPSPTTGTFFMAHMTQGSVSSATYSATTVCSNISTSDIRSSSSFEFKPHPTSNMAITDPNYQQSMQVQGHSQPFSSIPLVKSESAVTSNELSLSAPATVAASGASAPADGDSDELNQRGHPNSGVQSAQFDQKVSGTSVISSDDGYNWRKYGQKHVKGSEFPRSYYKCTHPNCEVKKLFERSHDGQITEIIYKGTHDHPKPQPSRRYNTGNIMSVQEERSDKYSSIAGRDDKSPSIYGQTSNTNDPNGTPDLSPIATNDDSAEATGNRINDDIDDDDPFSKRRKMEIGGIDVTPVVKPIREPRVVVQTLSEVDILDDGYRWRKYGQKVVRGNPNPRSYYKCTNAGCPVRKHVERASHDPKAVITTYEGKHNHDVPTARNSSHEMAGTMSA…	ATGAAGTTTCAAGGGCTTTTTGAAGCAGAACCTTCCCCAACTACTGGTACCTTTTTTATGGCTCACATGACACAGGGCTCAGTCAGCTCTGCCACATATTCAGCAACTACAGTTTGCTCAAATATCAGTACATCTGATATAAGGAGTTCGAGTTCCTTTGAGTTCAAACCCCATCCCACATCGAATATGGCTATTACAGATCCAAATTACCAACAGTCTATGCAAGTCCAAGGGCATTCTCAGCCATTTTCATCAATACCTCTAGTTAAAAGTGAGTCGGCAGTCACCTCAAATGAGTTGAGTTTATCAGCACCGGCGACTGTTGCTGCTTCAGGAGCTAGCGCACCTGCTGATGGTGATTCTGATGAATTAAACCAGAGGGGTCATCCTAATTCTGGG…
Gene.14270	BnGWRKY49	Group Ⅰ	chr11	17087386	17091174	+	567	61396.8	6.29	WRKYGQK, WRKYGQK	C-X4-C-X23-H-X-H, C-X4-C-X22-H-X-H	nucleus	-0.740741	MAAIERSDEVDPRTAETHDPPSASGGGAKYKLLSPAKLPISRSACLTIPPGLSPSSFLESPVLLSNMKAEPSPTTGTFFMAHMTQGSVSSATYSATTVCSNISTSDIRSSSSFEFKPHPTSNMAITDPNYQQSMQVQGHSQPFSSIPLVKSESAVTSNELSLSAPATVAASGASAPADGDSDELNQRGHPNSGVQSAQFDQKVSGTSVISSDDGYNWRKYGQKHVKGSEFPRSYYKCTHPNCEVKKLFERSHDGQITEIIYKGTHDHPKPQPSRRYNTGNIMSVQEERSDKYSSIAGRDDKSPSIYGQTSNTNDPNGTPDLSPIATNDDSAEATGNRINDDIDDDDPFSKRRKMEIGGIDVTPVVKPIREPRVVVQTLSEVDILDDGYRWRKYGQKVVR…	ATGGCGGCGATCGAGCGCTCCGACGAGGTGGATCCGAGGACGGCGGAGACTCACGATCCTCCTTCGGCTTCCGGCGGTGGAGCGAAGTACAAGCTCTTGTCGCCGGCGAAGCTTCCGATCTCGAGGTCGGCTTGCCTGACGATTCCTCCGGGGCTTAGTCCGTCGTCGTTTCTGGAATCGCCGGTTTTGCTCTCCAATATGAAGGCAGAACCTTCCCCAACTACTGGTACCTTTTTTATGGCTCACATGACACAGGGCTCAGTCAGCTCTGCCACATATTCAGCAACTACAGTTTGCTCAAATATCAGTACATCTGATATAAGGAGTTCGAGTTCCTTTGAGTTCAAACCCCATCCCACATCGAATATGGCTATTACAGATCCAAATTACCAACAGTCT…
Maker00040205	BnGWRKY50	Group Ⅱc	chr12	3084654	3090549	-	199	22658.9	5.73	WRKYGQK	C-X4-C-X23-H-X-H	nucleus	-0.882412	MMKYQQSLFDQESNNIDDHDHDQDQDQDQADHQTPSQMGFFSFPPNNMTLINNPPILGCLKSFPSSSTTTTISALLPCSLSISDHHHTLPSSINSNNSSNNTNNNNLSSETLLVSSLVDVLDDGYKWRKYGQKVVKNTQHPRSYYRCTQDNCRVKKRVERLAEDPRMVITTYEGRHVHSPSHDLETDSQAPSPLSNFFW	ATGATGAAGTACCAGCAGAGCTTGTTTGATCAGGAGAGTAATAATATTGATGATCATGATCATGATCAAGATCAAGATCAAGATCAAGCTGATCATCAAACCCCATCACAAATGGGTTTCTTTTCTTTTCCTCCAAACAACATGACCCTAATCAATAATCCCCCAATATTGGGATGCCTCAAATCCTTTCCCTCATCATCAACAACAACTACAATCTCAGCCTTGTTGCCTTGTTCCCTTTCAATATCTGATCATCACCACACTTTGCCTTCCTCTATCAACAGCAATAATAGTAGCAATAATACTAATAATAATAACCTCTCATCAGAAACTCTTTTAGTCTCATCTCTGGTGGATGTGCTTGATGATGGATACAAGTGGAGGAAGTACGGACAGAAA…
Maker00058256	BnGWRKY51	Group Ⅱd	chr12	9210554	9214442	+	271	28668.4	9.3	WRKYGQK	C-X5-C-X23-H-X-H	nucleus	-0.369373	MMEKVSVTDSAVQEAASGLESVESFARLLSSRAAHSPADCKAAADAAVSKFKRVISLLGRTSRTGHARFRRAPVASAAPVTAGEGLLRDPDPADPAASAAASSAGAGAEGLVLFGDRVLERDDVVSVHADGGDGERQGRAVIFVHRGRETACSSENLGSGKCASGSSGRCHCSKKSRKMRMKRVVRVPAISLKMADIPPDDYSWRKYGQKPIKGSPHPRGYYKCSSVRGCPARKHVERALDDPAMLVVTYEGEHNHTLSVAEASNLILESS	ATGATGGAGAAAGTATCCGTGACGGACAGCGCCGTCCAAGAAGCCGCGTCGGGGCTGGAGAGCGTCGAGAGCTTCGCGCGCCTCCTCTCCAGCCGCGCCGCCCACAGCCCCGCCGACTGCAAGGCCGCCGCCGACGCCGCCGTCTCCAAGTTCAAGCGCGTCATCTCCCTCCTCGGCCGCACCTCCCGCACCGGCCACGCCCGCTTCCGCCGCGCGCCCGTCGCCTCCGCCGCCCCCGTAACGGCCGGCGAAGGTCTACTTCGCGACCCCGATCCAGCAGATCCCGCCGCCTCCGCCGCCGCCTCCTCCGCCGGCGCCGGCGCCGAAGGCCTCGTCCTGTTCGGTGATCGAGTTCTCGAGCGCGACGACGTCGTTTCTGTCCACGCTGACGGGGGAGAC…
Maker00003204	BnGWRKY52	Group Ⅱa	chr13	1502175	1504076	-	295	33825.7	6.83	WRKYGQK	C-X5-C-X23-H-X-H	nucleus	-1.03051	MNQNKIMESLKEDLKNARKENEALRFMLEVTTRKCKMLGAQLKEKISLLKAQNNNNDNNNMVENNYKRSRIDDDDDLNIPISTKTRQVFVRTDPKDKSLVVKDGYQWRKYGQKVTKDNPFPRAYFRCSMAPGCPVKRKVQRSREDKSILVATYDGDHNHDACGSVVPYGLSSSPDDQRDDHDDDDDHDQNRSVASTISTSPPPRRPTITLDLSLSGFNNDVVNQDHDRTAIIPRSSQVLDHHHHRDDMTKPMIMKENNNNNNVEEYVASLTRDHSFTLALAEAVARSMKDHVYPT	ATGAATCAAAACAAGATCATGGAATCTCTCAAAGAAGATCTGAAAAATGCGAGAAAGGAGAATGAAGCTTTGAGATTCATGCTTGAAGTGACGACTAGAAAATGCAAAATGCTTGGAGCCCAGCTCAAGGAAAAAATAAGCTTATTAAAAGCACAAAATAATAATAATGATAATAATAATATGGTTGAAAATAATTACAAGAGATCCAGGATTGATGATGATGATGATCTGAATATTCCTATATCGACCAAGACTAGGCAAGTGTTCGTGCGAACAGACCCGAAAGACAAGAGCCTAGTGGTGAAAGATGGGTATCAATGGAGGAAATATGGGCAAAAGGTTACGAAGGACAATCCATTCCCTCGAGCTTACTTTAGGTGTTCCATGGCTCCTGGATGC…
Maker00003283	BnGWRKY53	Group Ⅱa	chr13	1510296	1513310	-	341	37614.3	7.66	WRKYGQK	C-X5-C-X23-H-X-H	nucleus	-0.653666	MDSTKSWLNTSLDLNLNPFNHVISDIVPKKELFSDSVNDKSDKGKLFAKEEDSDQMQLAQKLDRLSSENKKLVEMLTMMCDNYNALQRQYRDLMSKTSHDHENYSETLSPSRKRKAADSEGYTNNSNAIVNSSGLFINGSSGVESSSSDDEYSCKVPKEIKSKISTVYVRVDSSDKTLLVKDGYHWRKYGQKVTRDNPSPRAYFKCSFAPTCPVKKKVQRSAEDPSLLVVTYEGKHCHMKPSQSHLSIGPIKPAGPGLPVIRSPAGSTITLDMVHPAGSGDPPKMPGQQGGLNIDQTPVLQHILVQQMASSLTRDPNFTAALAAAISGRIFDHSTDPMDDS	ATGGACTCAACAAAATCTTGGTTGAACACTTCTCTGGATCTCAATCTCAACCCATTCAACCATGTGATCAGCGATATTGTTCCTAAGAAAGAGTTGTTTAGTGATTCCGTTAATGACAAGTCTGACAAAGGAAAATTATTTGCCAAAGAGGAGGATTCTGATCAAATGCAATTAGCCCAAAAGCTTGATAGGTTAAGCTCCGAGAACAAGAAGCTCGTTGAAATGTTGACTATGATGTGTGATAATTACAATGCTTTGCAAAGACAGTATAGGGATTTGATGAGCAAGACCTCTCATGATCATGAAAATTATAGCGAAACGCTCTCGCCGTCGCGCAAGCGAAAGGCCGCGGACAGCGAAGGCTACACCAATAATAGCAATGCCATTGTCAATAGTAGC…
Maker00003406	BnGWRKY54	Group Ⅱd	chr13	2128790	2130512	-	380	41885.5	9.52	WRKYGQK	C-X5-C-X23-H-X-H	nucleus	-0.682632	MAVELIMGNYRMVSMEENAVKEAASAGIQSVEKFLRLISQQQQDQQQQYHQQQQQQQGSIEYKEIADVAVNKFKKVISLLDRGRTGHARFRRAPLPASQPQRQDSPPPIPSRDPQPLTEPQIPKPEPQQQPSGSAFKVYCPTPVLRLPPLPHNNNSQAQPRSLTQPTNVAVLRPADKKESATTINFSPSPSISAANSFMSSLTGDADSTIQTSLSSGFQLTNLSQSSAGKPPLSSSFKRKCSSVDDAALRCGASSSGRCHCSKKRKSKVKRVIRVPAISMKMADIPPDEYSWRKYGQKPIKGSPHPRELTKKPQSPSCDLFYLICFQGYYKCSSLRGCPARKHVERALDDPAMLIVTYEGDHNHAQSTADQTAGIVLESS	ATGGCCGTGGAATTGATTATGGGTAATTACAGGATGGTCAGCATGGAAGAGAATGCCGTGAAGGAAGCTGCTTCGGCGGGGATTCAGAGCGTCGAGAAATTCCTTAGACTCATATCTCAGCAACAGCAAGATCAACAACAACAGTACCATCAACAACAACAACAACAACAGGGTTCGATAGAGTACAAGGAAATCGCAGATGTGGCTGTGAACAAGTTCAAAAAGGTCATCTCTTTGCTCGACAGAGGCAGAACCGGCCACGCCCGCTTCAGAAGAGCCCCTCTGCCGGCTTCTCAACCTCAACGGCAAGACTCTCCGCCGCCGATCCCCTCCCGGGACCCACAACCACTCACCGAACCACAAATCCCAAAACCAGAGCCGCAACAACAGCCCTCGGGC…
Maker00047149	BnGWRKY55	Group Ⅱd	chr13	2872529	2875588	-	361	39616.8	9.65	WRKYGQK	C-X5-C-X23-H-X-H	nucleus	-0.707479	MAVELIMGNYRMVSMEENAVKEAASAGIQSVEKFLRLISQQQQDQQQQYHQQQQQQQQGSIEYKEIADVAVNKFKKVISLLDRGRTGHARFRRAPLPASQPQRQDSPPPIPSRDPQPLTEPQIPKPEPQQQPSGSAFKVYCPTPVLRLPPLPHSSNSQAQPRSLTQPTNVAVLRPADKKESATTINFSPSPSISAANSFMSSLTGDADSTIQTSLSSGFQLTNLSQSSAGKPPLSSSFKRKCSSVDDAALRCGASSSGRCHCSKKRKSKVKRVIRVPAISMKMADIPPDEYSWRKYGQKPIKGSPHPRGYYKCSSLRGCPARKHVERALDDPAMLIVTYEGDHNHAQSTADQTAGIVLESS	ATGGCCGTGGAATTGATTATGGGTAATTACAGGATGGTCAGCATGGAAGAGAATGCCGTGAAGGAAGCTGCTTCGGCGGGGATTCAGAGCGTCGAGAAATTCCTTAGACTCATATCTCAGCAACAGCAAGATCAACAACAACAGTACCATCAACAACAACAACAACAACAACAGGGTTCGATAGAGTACAAGGAAATCGCAGATGTGGCTGTGAACAAGTTCAAAAAGGTCATCTCTTTGCTCGACAGAGGCAGAACCGGCCACGCCCGCTTCAGAAGAGCCCCTCTGCCGGCTTCTCAACCTCAACGGCAAGACTCTCCGCCGCCGATCCCCTCCCGGGACCCACAACCACTCACCGAACCACAAATCCCAAAACCAGAGCCGCAACAACAGCCCTCG…
Maker00043827	BnGWRKY56	Group Ⅱc	chr13	3990055	3991855	-	204	23056.8	5.13	WRKYGQK	C-X4-C-X23-H-X-H	nucleus	-1.13186	MFANSSSYHYHCDYLNMSGGSSSNINNNYNYNNYDPIHHHGHQGQYNSPETDEFPDDQSNFDNFPDLSMLDEWLDSDGAPLVGQESAPPSQVYGSLAANEEAVDESGGSGSQVGGGHVSRERNEGREGRERVAFKTKSEVEILDDGFKWRKYGKKMVKNSPNPRNYYRCSVEGCPVKKRVERDREDPQFVITTYEGVHNHQSSF	ATGTTCGCTAATTCCTCTTCATATCATTACCATTGTGATTATCTCAATATGTCTGGTGGCTCTAGCAGTAACATCAACAACAACTATAACTACAACAACTATGATCCAATCCATCACCACGGCCACCAAGGCCAGTACAACTCTCCGGAGACCGACGAGTTCCCCGACGACCAATCGAATTTCGACAACTTCCCCGACCTGTCCATGCTGGACGAGTGGCTGGACAGCGACGGCGCGCCTCTGGTGGGCCAGGAGAGCGCGCCGCCGAGCCAGGTGTACGGCTCTCTGGCCGCCAATGAGGAGGCTGTTGATGAGTCTGGTGGAAGTGGCAGCCAAGTTGGAGGAGGACATGTCAGCAGAGAGAGAAATGAAGGAAGGGAAGGGAGAGAGAGAGTGGCG…
Maker00082380	BnGWRKY57	Group Ⅱd	chr13	10802911	10805006	-	366	39056	9.73	WRKYGQK	C-X5-C-X23-H-X-H	nucleus	-0.584699	MAVELMGGFPKMDDQTAIQEAASQGLKSMEHLIRILSHHQQQQHHHHHQPNLTDCADLTDATVSKFRKVISLLNRTGHARFRRAPVRPVSSSPPSSSSSSGSLSVPHPQALTLAPSPIAAPAPPPIAPLPAPASFVQPPAQPQSMTLDFTKPNHHHHHGHGQFKSEVEFAKESFSVSSSSSFMSSAITGDGSVSNGKQGSIFLSKAAPAPAASGGKPPLSAAPYKKRCHEHELSGDASGRISGSASGSGKCHCSKRRKNRVKKTIRVPAISSKIADIPQDEYSWRKYGQKPIKGSPYPRGYYKCSTVRGCPARKHVERAPDDPAMLIVTYEGEHRHAHQGSVADHALPAGSSGGVSLVFESTPGKP	ATGGCGGTGGAGCTCATGGGGGGCTTCCCGAAGATGGACGATCAGACGGCGATCCAGGAGGCTGCATCGCAAGGCCTCAAGAGCATGGAACACCTGATCCGAATCCTCTCCCACCACCAGCAGCAACAACACCACCACCACCACCAGCCGAACCTCACCGACTGCGCGGACCTCACCGACGCAACCGTATCCAAGTTCCGCAAGGTCATCTCTCTCCTCAACCGGACCGGCCACGCCCGGTTCAGGCGCGCTCCGGTCCGACCGGTCAGTTCCTCTCCCCCGTCCTCCTCCTCCTCCTCCGGCTCGCTCTCCGTCCCCCACCCCCAAGCCCTAACCCTAGCTCCTTCGCCGATCGCCGCTCCGGCGCCGCCGCCGATCGCCCCGCTGCCGGCTCCGGCG…
Maker00096083	BnGWRKY58	Group Ⅱc	chr13	15340421	15346801	-	259	28973.8	7.8	WRKYGQK	C-X4-C-X23-H-X-H	nucleus	-0.969884	MEGDHHQHHHHHHHHNHNHRRSSGSVAISYDLSVSFSSTPTVPPIPEMGFGDSQFEVQHQHQHHNVLSNFLSPISSTAAAAQPPQPPPPPPPPPSLLSDALNSGGTAAAGFCPGGDLVGRPSWNNEQVVGNLDPKAVVDENTGNASDGSNSWWRSSSADKNKVKVRRKLREPRFCFQTRSDVDVLDDGYKWRKYGQKVVKNSLHPRSYYRCTHNNCRVKKRVERLSEDCRMVITTYEGRHNHSPSDDSNSSEHECFSSF	ATGGAAGGAGATCATCACCAACATCATCATCATCATCATCATCATAATCATAATCATCGACGATCATCGGGATCTGTGGCGATCAGCTACGACCTATCGGTGTCGTTCAGCTCAACCCCGACAGTACCGCCGATCCCCGAAATGGGGTTCGGCGATAGTCAGTTCGAAGTTCAACACCAACACCAACACCACAACGTACTAAGTAATTTCTTGTCACCAATATCCTCAACGGCCGCTGCAGCGCAGCCGCCGCAACCGCCGCCGCCGCCGCCGCCGCCTCCGTCGCTGTTGAGCGATGCCCTCAACAGCGGCGGCACCGCCGCCGCCGGGTTCTGCCCTGGCGGCGATCTCGTAGGGAGGCCTTCTTGGAATAATGAACAAGTGGTGGGAAATTTGGAT…
Maker00017564	BnGWRKY59	Group Ⅱc	chr13	16293920	16300403	-	251	28048.7	7.31	WRKYGQK	C-X4-C-X23-H-X-H	nucleus	-0.943028	MEGDHHHHHHHNHRRSSGSVAISYDLSVSFSSTPTVPPIPEMGFGDSQFEDQHQHQHQHHNVLSNFLSPISSTAAAAQPPQPPPPPSLLSDALNSGGTAAAGFCPGGDLVGRPSWNNEQVVGSLDPKAVVDENTGNASDGSNSWWRSSSADKNKVKVRRKLREPRFCFQTRSDVDVLDDGYKWRKYGQKVVKNSLHPRSYYRCTHNNCRVKKRVERLSEDCRMVITTYEGRHNHSPSDDSNSSEHECFSSF	ATGGAAGGAGATCATCACCATCATCATCATCATAATCATCGACGATCATCGGGATCTGTGGCGATCAGCTACGACCTATCGGTGTCGTTCAGCTCAACCCCGACAGTACCGCCGATCCCCGAAATGGGGTTCGGCGATAGTCAGTTCGAAGATCAACACCAACACCAACACCAACACCACAACGTACTAAGTAATTTCTTGTCACCAATATCCTCAACGGCCGCTGCAGCGCAGCCGCCGCAACCGCCGCCGCCTCCGTCGCTGTTGAGCGATGCCCTCAACAGCGGCGGCACCGCCGCCGCCGGGTTCTGCCCTGGCGGCGATCTCGTAGGGAGGCCTTCTTGGAATAATGAACAAGTGGTAGGAAGTTTGGATCCGAAGGCTGTTGTTGACGAAAAC…
Maker00089270	BnGWRKY60	Group Ⅰ	chr14	17817484	17824701	+	482	53169.9	9.26	WRKYGQK, WRKYGQK	C-X4-C-X23-H-X-H, C-X4-C-X22-H-X-H	nucleus	-0.928216	MLNRHVIGAYICLEMDVKESERTVIAKPVASRPTCSSFRSFSELLAGAINAAPSNTTTSSETATIPAIRPKTVRFKPTVHCAASGLISSQVEISGDAMCNNQSDKVSNSEVKSTVVYKPLAKVVSKTTVSLLATMGNFNSKSLQQIQPPINSKAQRSHQERDTLRPRLPSRPEPVQPTEPLKRTLSTTQNQEDDTRSLPSMGSSDRPSYDGYNWRKYGQKQVKGSEYPRSYYKCTHPSCPVKKKVERSLDGQIAEIVYKGEHNHSKPQLAKRGSSGTQAGGLIPDTPNQDANNHLWNSGQLSERNEGSEGRIDNHNEVGLSSSMHSYRGIKASQPYNSSLAAASDNNNHSYGVSVEAEEGSKGLEAEEEEPRNTKRRKRDNQSNEAGTSGDAIQESKVV…	ATGCTGAATAGACACGTAATCGGCGCATACATTTGTTTAGAAATGGATGTCAAAGAGTCAGAGAGGACGGTTATTGCAAAACCAGTTGCTTCTAGGCCTACTTGTTCCAGCTTCAGATCATTCTCCGAGCTCCTTGCTGGTGCCATCAATGCCGCACCTTCTAACACCACCACATCTTCTGAGACCGCCACCATCCCTGCCATTAGGCCGAAGACGGTTAGGTTTAAGCCAACGGTTCACTGTGCAGCTTCCGGGTTGATTTCCTCTCAGGTAGAGATTTCTGGGGATGCAATGTGCAACAATCAATCTGATAAGGTCTCTAATTCGGAAGTAAAGTCGACTGTGGTGTATAAACCATTGGCTAAAGTTGTGTCAAAGACTACTGTTTCTCTCTTGGCA…

## Sheet: Sheet1
Maker00074910	BnGWRKY1	whole_GLEAN_10011594
Maker00076242	BnGWRKY2	whole_GLEAN_10024374
Maker00075096	BnGWRKY3	whole_GLEAN_10024718
Maker00075081	BnGWRKY4	whole_GLEAN_10024771
Maker00079308	BnGWRKY5	whole_GLEAN_10020641
Maker00088387	BnGWRKY6	whole_GLEAN_10020641
Maker00065350	BnGWRKY7	whole_GLEAN_10023836
Maker00069778	BnGWRKY8	whole_GLEAN_10024050
Maker00062515	BnGWRKY9	whole_GLEAN_10024149
Maker00062719	BnGWRKY10	whole_GLEAN_10024370
Maker00071140	BnGWRKY11	whole_GLEAN_10027424
Maker00024930	BnGWRKY12	whole_GLEAN_10027424
Maker00025486	BnGWRKY13	whole_GLEAN_10004168
Maker00047381	BnGWRKY14	whole_GLEAN_10010850
Maker00053039	BnGWRKY15	whole_GLEAN_10015412
Maker00073713	BnGWRKY16	whole_GLEAN_10015473
Maker00012805	BnGWRKY17	whole_GLEAN_10025747
Maker00013013	BnGWRKY18	whole_GLEAN_10025666
Maker00000768	BnGWRKY19	whole_GLEAN_10028773
Maker00000056	BnGWRKY20	whole_GLEAN_10028719
Maker00000445	BnGWRKY21	whole_GLEAN_10028387
Maker00077582	BnGWRKY22	whole_GLEAN_10015273
Maker00077681	BnGWRKY23	whole_GLEAN_10015271
Maker00077507	BnGWRKY24	whole_GLEAN_10000665			whole_GLEAN_10023069
Maker00003346	BnGWRKY25	whole_GLEAN_10015412
Maker00016870	BnGWRKY26	whole_GLEAN_10018385
Maker00070084	BnGWRKY27	whole_GLEAN_10007648
Maker00070435	BnGWRKY28	whole_GLEAN_10004168
Maker00083407	BnGWRKY29	whole_GLEAN_10007648
Maker00006282	BnGWRKY30	whole_GLEAN_10018183
Maker00039158	BnGWRKY31	whole_GLEAN_10009855
Maker00084561	BnGWRKY32	whole_GLEAN_10013009
Maker00080492	BnGWRKY33	whole_GLEAN_10019932
Maker00042305	BnGWRKY34	whole_GLEAN_10021991
Maker00064384	BnGWRKY35	whole_GLEAN_10007046
Maker00064771	BnGWRKY36	whole_GLEAN_10021083
Maker00064087	BnGWRKY37	whole_GLEAN_10020967
Maker00078039	BnGWRKY38	whole_GLEAN_10007348
Maker00092999	BnGWRKY39	whole_GLEAN_10007348
Maker00013927	BnGWRKY40	whole_GLEAN_10018083
Maker00008224	BnGWRKY41	whole_GLEAN_10018812
Maker00060678	BnGWRKY42	whole_GLEAN_10018812
Maker00074209	BnGWRKY43	whole_GLEAN_10016946
Maker00059396	BnGWRKY44	whole_GLEAN_10019158
Maker00038000	BnGWRKY45	whole_GLEAN_10019375
Maker00041241	BnGWRKY46	whole_GLEAN_10041241
Gene.14283	BnGWRKY47	whole_GLEAN_10017585
Gene.14281	BnGWRKY48	whole_GLEAN_10017585
Gene.14270	BnGWRKY49	whole_GLEAN_10017585
Maker00040205	BnGWRKY50	whole_GLEAN_10021608
Maker00058256	BnGWRKY51	whole_GLEAN_10019774			whole_GLEAN_10002418
Maker00003204	BnGWRKY52	whole_GLEAN_10029880
Maker00003283	BnGWRKY53	whole_GLEAN_10029879
Maker00003406	BnGWRKY54	whole_GLEAN_10029794
Maker00047149	BnGWRKY55	whole_GLEAN_10029794
Maker00043827	BnGWRKY56	whole_GLEAN_10029574
Maker00082380	BnGWRKY57	whole_GLEAN_10028113
Maker00096083	BnGWRKY58	whole_GLEAN_10005858
Maker00017564	BnGWRKY59	whole_GLEAN_10005858
Maker00089270	BnGWRKY60	whole_GLEAN_10015931
