# Supplementary material for: Analysis of WRKY Resistance Gene Family in Boehmeria nivea (L.) Gaudich: Crosstalk Mechanisms of Secondary Cell Wall Thickening and Cadmium Stress
Source: Front Plant Sci. 2022 Mar 28;13:812988. doi: 10.3389/fpls.2022.812988 (PMC9010656; doi:10.3389/fpls.2022.812988)
Supplement: Supplementary file 4 [file Table_2.XLSX]

## Sheet: a
Table S2: Consensus sequences of the group specific motifs.
Motif	Width	Consensus sequences
1	22	ILDDGYRWRKYGQK[VP][VI]K[GN][SN]P[YNH]P
2	29	GCP[VA][RK]K[QH]V[EQ]R[SA]S[DE]DPS[MI][VL][IV]TTYEGKHNH[PD]
3	50	DGYNWRKYGQK[QH]VKGSE[YF]PRSYYKCTH[PL]NC[PQE]VKK[KL][VF]ERS[HL]DGQ[IV]TEI[IV]YK
4	8	R[SG]YY[RK]C[TS]S
5	28	[EK]XXG[KV]EK[TK]K[GV]X[KR]R[IV]REPR[VF][VA][VF][QM]T[KT]SEVD
6	48	[RNP][SN][PN][CNY][LN][TS][IS][SP][PV][GP][LFI]SPT[ADT][LF]L[DN]SP[IV][FM]L[SP][NA]S[LN]A[LMQ]PSPTTG[TAK]F[PL][FG][PQV][PT][FNY][DGR][HNW][CET][SR][INS][SI]
7	46	[EK]L[AES][AQS][LT][KQ][AE][EK][LM][DEGK][RE][VM][RKNS][ESA]EN[EKQ][RK]L[KR][EF][MV]L[ET][QHRV][IMTV][TCM][KN][ND]Y[KN][AST]LQ[MS][QH][FL][FAV][DAE][ILMV][IMA][QS][NQK][NQ][QKS][AH]
8	39	G[TAS]H[DN]H[PA]KPQ[PS][NST]RR[YAS][ANS][TLS]G[NPS][IG][MFN][SQ][VF][QDS][EDS][EMY][RAS][SEN][DSV][KDS][YEH][SG][SGT][IGH][AT][GCL][RLS][DKN][AD][KEV]
9	15	K[KR]RK[SN][QR][VP][KR][RKW][VT][VI][RQ]VP[AV]
10	50	ERLPAARPEIMDGQTHNPSLNVLQAAQVPAFYGILNNGLNPFGSRENHGD
11	21	LP[PV][AS]A[TM]AMASTTS[AS]AASMLLS
12	29	[ETD][DN][EDG][DF][DSR][RAV][EGNT][AQST][TGHP][GST][NFMS][RVS][SIV][GNL][GD][DY][IADN][DE][DE][DEN][ED][PS][EFD]SKR[RW]K[MGIK]
13	26	[VI][AES][AEQ][AM][ATV][AKST][AS][IL][TA][ARS][DN]P[NK]F[TQ][AS]ALAAA[IL][ST][SG][IFR][IM]
14	29	VP[AT]ARN[SG][SN]H[VE][NM][AS]G[GT][MAP][NSA][AST][NT][VAL][PAQ][AT][RAH][MNV][NR][AS][EHQ][EQ][TAP][DEL]
15	29	[ADQ][QS]ASP[IE][TES][ACR][EK][DE]L[AV][DQ]R[IA][VL][ST][SK][FY][KE]K[VT][IL][SL]LL[DN][RW][GST]
16	20	[TM][LI]I[DG]EL[VI]QG[RKM]ELA[KT]QLR[AQ][LHN]L
17	8	[DN]HHHHH[HN]H
18	50	N[NS][GT][TY][GS][DT][NQ][LM][DG][LN][PT]N[IV][GS][GQ]T[DS]W[GH][FY]S[DS][DQ][HN][GH][DN][EH][HI][HR]N[FN][KS]T[IL][GQ][NP]IS[IT]N[NP][FS]SS[FL][FL][AE][DN][DN][HN]
19	49	APATVAASGASAPADGDSDELNQRGHPNSGVQSAQFDQKVSGTSVISSD
20	50	[FS]S[QS][GS]FMP[PT][AR][GT][FP][CE]S[NS][YHN][FY][AT][AV]S[AP][AF][AQ][IL][DN][NLP][QS][LV][GH]FHH[QS][PV][RY][RS][ST][ET][NS][DP][LY][AT][CE][IS][IS][ST][AS][NT][IT][ST]A
