# Supplementary material for: Analysis of WRKY Resistance Gene Family in Boehmeria nivea (L.) Gaudich: Crosstalk Mechanisms of Secondary Cell Wall Thickening and Cadmium Stress
Source: Front Plant Sci. 2022 Mar 28;13:812988. doi: 10.3389/fpls.2022.812988 (PMC9010656; doi:10.3389/fpls.2022.812988)
Supplement: Supplementary file 5 [file Table_3.XLSX]

## Sheet: Sheet1
Table S3: Ka/Ks calculation of the duplicated ramie WRKY gene pairs.
Gene1	Gene2	Ka	Ks	Ka/Ks	Duplication Type
Maker00076242	Maker00003346	0.656652	1.90629	0.344466	Segmental
Maker00075096	Maker00077681	0.648837	3.03706	0.21364	Segmental
Maker00059396	Maker00000056	0.510965	1.69544	0.301377	Segmental
Maker00059396	Maker00064087	0.510124	1.34919	0.378097	Segmental
Maker00041241	Maker00062719	0.463521	1.77267	0.261482	Segmental
Gene.14270	Maker00073713	0.572868	2.01313	0.284566	Segmental
Maker00058256	Maker00003406	0.435351	1.53736	0.28318	Segmental
Maker00058256	Maker00047149	0.432493	1.533	0.282122	Segmental
Maker00003406	Maker00047149	0.0024565	0.0195962	0.125356	Segmental
Maker00096083	Maker00017564	0.00524172	0.0182195	0.287698	Segmental
Maker00079405	Maker00088387	0.00802415	0.0153262	0.523557	Segmental
Maker00062719	Maker00047381	0.455935	2.48143	0.183739	Segmental
Maker00069778	Maker00012805	0.35948	1.11432	0.322599	Segmental
Maker00071140	Maker00024930	0.0350131	0.0556104	0.629615	Segmental
Maker00025486	Maker00070435	0.00706395	0.0449257	0.157236	Segmental
Maker00000056	Maker00064087	0.546597	1.80179	0.303363	Segmental
Maker00000768	Maker00064771	0.317024	2.39091	0.132596	Segmental
Maker00077582	Maker00083721	0.506416	4.96205	0.102058	Segmental
Maker00078039	Maker00092999	0.00238687	0.021437	0.111344	Segmental
Maker00008224	Maker00060678	0.00482472	0.0136678	0.352999	Segmental
Maker00075081	Maker00013927	0.451401	NaN	NaN	Segmental	High Sequence Divergence Value (pS>=0.75)
Maker00074209	Maker00063956	0.835634	NaN	NaN	Segmental	High Sequence Divergence Value (pS>=0.75)
Maker00003204	Maker00065350	0.551738	NaN	NaN	Segmental	High Sequence Divergence Value (pS>=0.75)
Maker00062515	Maker00013013	0.465747	NaN	NaN	Segmental	High Sequence Divergence Value (pS>=0.75)
Maker00077681	Maker00084561	0.652653	NaN	NaN	Segmental	High Sequence Divergence Value (pS>=0.75)
Gene.14283	Gene.14281	0.019925	0.0142222	1.40098	Tandem
Gene.14283	Gene.14270	0.019925	0.0142222	1.40098	Tandem
Gene.14270	Gene.14281	0.0105901	0.0108766	0.97366	Tandem
Maker00003204	Maker00003283	0.736423	1.93812	0.379968	Tandem
