# Supplementary material for: Analysis of WRKY Resistance Gene Family in Boehmeria nivea (L.) Gaudich: Crosstalk Mechanisms of Secondary Cell Wall Thickening and Cadmium Stress
Source: Front Plant Sci. 2022 Mar 28;13:812988. doi: 10.3389/fpls.2022.812988 (PMC9010656; doi:10.3389/fpls.2022.812988)
Supplement: Supplementary file 6 [file Table_4.XLSX]

## Sheet: A. thaliana and B. nivea 
Table S4: One-to-one orthologous relationships between ramie and other four species.
A. thaliana			B. nivea
At1	AT1G29860.1	==	Bn2	Maker00062515
At1	AT1G80840.1	==	Bn2	Maker00065350
At1	AT1G62300.1	==	Bn2	Maker00062719
At1	AT1G69810.1	==	Bn4	Maker00000056
At1	AT1G64000.1	==	Bn5	Maker00077582
At1	AT1G69310.1	==	Bn7	Maker00064384
At1	AT1G69810.1	==	Bn7	Maker00064087
At1	AT1G13960.1	==	Bn7	Maker00064771
At2	AT2G40740.3	==	Bn1	Maker00074910
At2	AT2G40750.1	==	Bn1	Maker00076242
At2	AT2G46400.1	==	Bn1	Maker00075081
At2	AT2G23320.1	==	Bn12	Maker00058256
At2	AT2G24570.1	==	Bn13	Maker00082380
At2	AT2G25000.1	==	Bn13	Maker00003204
At2	AT2G37260.1	==	Bn14	Maker00089270
At2	AT2G04880.1	==	Bn4	Maker00073713
At2	AT2G46130.1	==	Bn5	Maker00077582
At2	AT2G03340.1	==	Bn7	Maker00064771
At2	AT2G46400.1	==	Bn8	Maker00013927
At3	AT3G56400.1	==	Bn1	Maker00076242
At3	AT3G58710.1	==	Bn4	Maker00012805
At3	AT3G01080.2	==	Bn4	Maker00000768
At3	AT3G62340.1	==	Bn6	Maker00006282
At4	AT4G26640.2	==	Bn11	Gene.14270
At4	AT4G30935.1	==	Bn11	Maker00038000
At4	AT4G39410.1	==	Bn12	Maker00040205
At4	AT4G31550.1	==	Bn13	Maker00082380
At4	AT4G31800.1	==	Bn13	Maker00003204
At4	AT4G22070.1	==	Bn2	Maker00062719
At4	AT4G18170.1	==	Bn2	Maker00062515
At4	AT4G04450.1	==	Bn2	Maker00062719
At4	AT4G23550.1	==	Bn5	Maker00077681
At5	AT5G52830.1	==	Bn1	Maker00075096
At5	AT5G24110.1	==	Bn1	Maker00075081
At5	AT5G46350.1	==	Bn2	Maker00062515
At5	AT5G15130.1	==	Bn4	Maker00000056
At5	AT5G01900.1	==	Bn5	Maker00003346
At5	AT5G41570.1	==	Bn5	Maker00077582
At5	AT5G49520.1	==	Bn9	Maker00060678

## Sheet: C. sativa and B. nivea  
Table S5: One-to-one orthologous relationships between ramie and other four species.
C. sativa			B. nivea
Cs3	XM_030641552.1	==	Bn6	Maker00080492
Cs1	XM_030635098.1	==	Bn1	Maker00074910
Cs1	XM_030635506.1	==	Bn1	Maker00076242
Cs1	XM_030634024.1	==	Bn1	Maker00075096
Cs1	XM_030635756.1	==	Bn11	Maker00041241
Cs1	XM_030636029.1	==	Bn2	Maker00065350
Cs1	XM_030635756.1	==	Bn2	Maker00062719
Cs1	XM_030634323.1	==	Bn5	Maker00077582
Cs1	XM_030634024.1	==	Bn5	Maker00077681
Cs1	XM_030634024.1	==	Bn6	Maker00084561
Cs1	XM_030635552.1	==	Bn8	Maker00013927
Cs7	XM_030654467.1	==	Bn11	Maker00038000
Cs9	XM_030626041.1	==	Bn10	Maker00074209
Cs9	XM_030628861.1	==	Bn2	Maker00062719
Cs9	XM_030627069.1	==	Bn4	Maker00000768
Cs9	XM_030628757.1	==	Bn4	Maker00012805
Cs9	XM_030628296.1	==	Bn4	Maker00000056
Cs9	XM_030628711.1	==	Bn4	Maker00013013
Cs9	XM_030627375.1	==	Bn4	Maker00000056
Cs9	XM_030628861.1	==	Bn4	Maker00047381
Cs9	XM_030627375.1	==	Bn7	Maker00064087
Cs9	XM_030627069.1	==	Bn7	Maker00064771
Cs4	XM_030645936.1	==	Bn1	Maker00075081
Cs4	XM_030644646.1	==	Bn1	Maker00075081
Cs4	XM_030644598.1	==	Bn5	Maker00077507
Cs4	XM_030645936.1	==	Bn5	Maker00070084
Cs4	XM_030645936.1	==	Bn8	Maker00013927
Cs4	XM_030644646.1	==	Bn8	Maker00013927
Cs6	XM_030652310.1	==	Bn9	Maker00060678
Cs6	XM_030652310.1	==	Bn9	Maker00008224
CsX	XM_030630151.1	==	Bn12	Maker00058256
CsX	XM_030627717.1	==	Bn13	Maker00082380
CsX	XM_030637578.1	==	Bn6	Maker00006282
Cs2	XM_030637192.1	==	Bn10	Maker00059396
Cs2	XM_030639888.1	==	Bn14	Maker00089270
Cs8	XM_030624026.1	==	Bn2	Maker00062515
Cs8	XM_030623835.1	==	Bn2	Maker00088387

## Sheet: O. sativa and B. nivea 
Table S5: One-to-one orthologous relationships between ramie and other four species.
B. nivea			O. sativa
Bn1	Maker00076242	==	Os5	LOC_Os05g40060.1
Bn5	Maker00003346	==	Os11	LOC_Os11g02480.2
Bn5	Maker00003346	==	Os12	LOC_Os12g02420.1
Bn5	Maker00003346	==	Os5	LOC_Os05g40060.1
Bn6	Maker00080492	==	Os12	LOC_Os12g40570.1
Bn6	Maker00080492	==	Os3	LOC_Os03g53050.1
Bn6	Maker00080492	==	Os3	LOC_Os03g58420.1
Bn7	Maker00064384	==	Os3	LOC_Os03g55080.1
Bn7	Maker00064771	==	Os3	LOC_Os03g55164.1
Bn7	Maker00064771	==	Os7	LOC_Os07g40570.1

## Sheet: Z. mays and B. nivea 
Table S5: One-to-one orthologous relationships between ramie and other four species.
B. nivea			Z. mays
Bn5	Maker00003346	==	Zm3	Zm00001d043060_T001
Bn6	Maker00080492	==	Zm1	Zm00001d033965_T001
Bn6	Maker00080492	==	Zm1	Zm00001d034475_T001
Bn7	Maker00064771	==	Zm1	Zm00001d029564_T001
