# Supplementary material for: Analysis of WRKY Resistance Gene Family in Boehmeria nivea (L.) Gaudich: Crosstalk Mechanisms of Secondary Cell Wall Thickening and Cadmium Stress
Source: Front Plant Sci. 2022 Mar 28;13:812988. doi: 10.3389/fpls.2022.812988 (PMC9010656; doi:10.3389/fpls.2022.812988)
Supplement: Supplementary file 7 [file Table_5.XLSX]

## Sheet: Tbtools可视化
Table S5: The distribution of the four types of response cis-acting elements for each BnGWRKYs promoters
Gene.14270		1911	1947	Phytohormone responsive
Gene.14270		1912	1947	Phytohormone responsive
Gene.14281		406	442	Phytohormone responsive
Gene.14281		407	442	Phytohormone responsive
Maker00000056		1087	1122	Phytohormone responsive
Maker00000056		1588	1627	Phytohormone responsive
Maker00000056		1590	1626	Phytohormone responsive
Maker00000056		1591	1626	Phytohormone responsive
Maker00000445		91	128	Phytohormone responsive
Maker00000445		133	168	Phytohormone responsive
Maker00000445		179	215	Phytohormone responsive
Maker00000445		180	215	Phytohormone responsive
Maker00000445		605	640	Phytohormone responsive
Maker00000445		1117	1152	Phytohormone responsive
Maker00000768		137	176	Phytohormone responsive
Maker00000768		468	507	Phytohormone responsive
Maker00000768		863	898	Phytohormone responsive
Maker00000768		894	930	Phytohormone responsive
Maker00000768		895	930	Phytohormone responsive
Maker00003204		30	65	Phytohormone responsive
Maker00003204		672	709	Phytohormone responsive
Maker00003204		1501	1536	Phytohormone responsive
Maker00003204		1839	1875	Phytohormone responsive
Maker00003204		1840	1875	Phytohormone responsive
Maker00003204		1857	1892	Phytohormone responsive
Maker00003346		1610	1645	Phytohormone responsive
Maker00003406		23	58	Phytohormone responsive
Maker00003406		529	564	Phytohormone responsive
Maker00003406		1753	1789	Phytohormone responsive
Maker00003406		1754	1789	Phytohormone responsive
Maker00006282		1214	1250	Phytohormone responsive
Maker00006282		1215	1250	Phytohormone responsive
Maker00008224		1292	1331	Phytohormone responsive
Maker00008224		1294	1330	Phytohormone responsive
Maker00008224		1295	1330	Phytohormone responsive
Maker00008224		1460	1499	Phytohormone responsive
Maker00008224		1462	1498	Phytohormone responsive
Maker00008224		1463	1498	Phytohormone responsive
Maker00012805		239	274	Phytohormone responsive
Maker00012805		970	1005	Phytohormone responsive
Maker00013013		793	829	Phytohormone responsive
Maker00013013		794	829	Phytohormone responsive
Maker00013013		804	841	Phytohormone responsive
Maker00013013		834	870	Phytohormone responsive
Maker00013013		835	870	Phytohormone responsive
Maker00013927		1452	1487	Phytohormone responsive
Maker00016870		1760	1795	Phytohormone responsive
Maker00016870		1767	1802	Phytohormone responsive
Maker00017564		70	105	Phytohormone responsive
Maker00024930		1625	1660	Phytohormone responsive
Maker00025486		962	997	Phytohormone responsive
Maker00038000		1676	1711	Phytohormone responsive
Maker00039158		1054	1089	Phytohormone responsive
Maker00039158		1222	1257	Phytohormone responsive
Maker00039158		1330	1365	Phytohormone responsive
Maker00040205		260	298	Phytohormone responsive
Maker00040205		262	297	Phytohormone responsive
Maker00041241		403	439	Phytohormone responsive
Maker00041241		404	439	Phytohormone responsive
Maker00041241		1058	1094	Phytohormone responsive
Maker00041241		1059	1094	Phytohormone responsive
Maker00041241		1558	1597	Phytohormone responsive
Maker00041241		1560	1596	Phytohormone responsive
Maker00041241		1561	1596	Phytohormone responsive
Maker00042305		1925	1960	Phytohormone responsive
Maker00047149		28	63	Phytohormone responsive
Maker00047149		533	568	Phytohormone responsive
Maker00047149		1753	1789	Phytohormone responsive
Maker00047149		1754	1789	Phytohormone responsive
Maker00053039		895	930	Phytohormone responsive
Maker00053039		1097	1136	Phytohormone responsive
Maker00053039		1422	1461	Phytohormone responsive
Maker00058256		679	714	Phytohormone responsive
Maker00059396		715	750	Phytohormone responsive
Maker00060678		1295	1334	Phytohormone responsive
Maker00060678		1297	1333	Phytohormone responsive
Maker00060678		1298	1333	Phytohormone responsive
Maker00060678		1463	1502	Phytohormone responsive
Maker00060678		1465	1501	Phytohormone responsive
Maker00060678		1466	1501	Phytohormone responsive
Maker00062515		250	285	Phytohormone responsive
Maker00062515		291	326	Phytohormone responsive
Maker00062515		312	348	Phytohormone responsive
Maker00062515		313	348	Phytohormone responsive
Maker00062515		363	402	Phytohormone responsive
Maker00062515		365	401	Phytohormone responsive
Maker00062515		366	401	Phytohormone responsive
Maker00062515		370	409	Phytohormone responsive
Maker00062515		372	408	Phytohormone responsive
Maker00062515		373	408	Phytohormone responsive
Maker00062515		1403	1438	Phytohormone responsive
Maker00062719		635	670	Phytohormone responsive
Maker00062719		1414	1450	Phytohormone responsive
Maker00062719		1415	1450	Phytohormone responsive
Maker00062719		1574	1611	Phytohormone responsive
Maker00062719		1732	1771	Phytohormone responsive
Maker00062719		1734	1770	Phytohormone responsive
Maker00062719		1735	1770	Phytohormone responsive
Maker00064087		645	685	Phytohormone responsive
Maker00064384		373	408	Phytohormone responsive
Maker00065350		390	428	Phytohormone responsive
Maker00065350		392	427	Phytohormone responsive
Maker00065350		516	551	Phytohormone responsive
Maker00065350		700	735	Phytohormone responsive
Maker00065350		814	849	Phytohormone responsive
Maker00065350		833	868	Phytohormone responsive
Maker00065350		955	990	Phytohormone responsive
Maker00069778		177	212	Phytohormone responsive
Maker00069778		1578	1613	Phytohormone responsive
Maker00070084		565	600	Phytohormone responsive
Maker00071140		1609	1644	Phytohormone responsive
Maker00074209		1784	1823	Phytohormone responsive
Maker00074209		1804	1839	Phytohormone responsive
Maker00074209		1918	1953	Phytohormone responsive
Maker00074910		945	980	Phytohormone responsive
Maker00074910		1372	1412	Phytohormone responsive
Maker00074910		1375	1410	Phytohormone responsive
Maker00074910		1629	1664	Phytohormone responsive
Maker00074910		1964	1999	Phytohormone responsive
Maker00075081		976	1011	Phytohormone responsive
Maker00075081		1268	1303	Phytohormone responsive
Maker00075081		1875	1910	Phytohormone responsive
Maker00075096		160	195	Phytohormone responsive
Maker00075096		1380	1415	Phytohormone responsive
Maker00077507		145	180	Phytohormone responsive
Maker00077582		728	763	Phytohormone responsive
Maker00077582		1312	1347	Phytohormone responsive
Maker00077681		1075	1110	Phytohormone responsive
Maker00078039		712	749	Phytohormone responsive
Maker00079308		1817	1852	Phytohormone responsive
Maker00082380		13	48	Phytohormone responsive
Maker00082380		1599	1635	Phytohormone responsive
Maker00082380		1600	1635	Phytohormone responsive
Maker00083407		560	595	Phytohormone responsive
Maker00088387		1820	1855	Phytohormone responsive
Maker00092999		715	752	Phytohormone responsive
Maker00096083		82	117	Phytohormone responsive
Gene.14281		635	670	Phytohormone responsive
Gene.14283		34	69	Phytohormone responsive
Maker00000056		454	489	Phytohormone responsive
Maker00000056		1594	1629	Phytohormone responsive
Maker00000768		827	862	Phytohormone responsive
Maker00003204		1485	1520	Phytohormone responsive
Maker00003283		1710	1745	Phytohormone responsive
Maker00003346		1493	1528	Phytohormone responsive
Maker00003406		1248	1283	Phytohormone responsive
Maker00003406		1784	1819	Phytohormone responsive
Maker00003406		1816	1851	Phytohormone responsive
Maker00006282		656	691	Phytohormone responsive
Maker00006282		858	893	Phytohormone responsive
Maker00012805		642	677	Phytohormone responsive
Maker00012805		1972	2007	Phytohormone responsive
Maker00013013		205	240	Phytohormone responsive
Maker00013013		619	654	Phytohormone responsive
Maker00013927		1454	1489	Phytohormone responsive
Maker00017564		354	389	Phytohormone responsive
Maker00017564		412	447	Phytohormone responsive
Maker00017564		1434	1469	Phytohormone responsive
Maker00024930		1627	1662	Phytohormone responsive
Maker00025486		147	182	Phytohormone responsive
Maker00025486		733	768	Phytohormone responsive
Maker00025486		960	995	Phytohormone responsive
Maker00025486		1286	1321	Phytohormone responsive
Maker00025486		1602	1637	Phytohormone responsive
Maker00038000		1108	1143	Phytohormone responsive
Maker00041241		39	74	Phytohormone responsive
Maker00041241		1572	1607	Phytohormone responsive
Maker00042305		1616	1651	Phytohormone responsive
Maker00043827		1108	1143	Phytohormone responsive
Maker00043827		1510	1545	Phytohormone responsive
Maker00047149		1244	1279	Phytohormone responsive
Maker00047149		1784	1819	Phytohormone responsive
Maker00047149		1816	1851	Phytohormone responsive
Maker00047381		112	147	Phytohormone responsive
Maker00047381		1671	1706	Phytohormone responsive
Maker00053039		771	806	Phytohormone responsive
Maker00053039		1966	2001	Phytohormone responsive
Maker00059396		167	202	Phytohormone responsive
Maker00062515		248	283	Phytohormone responsive
Maker00062719		212	247	Phytohormone responsive
Maker00062719		1306	1341	Phytohormone responsive
Maker00062719		1529	1564	Phytohormone responsive
Maker00062719		1745	1780	Phytohormone responsive
Maker00062719		1757	1792	Phytohormone responsive
Maker00064087		531	566	Phytohormone responsive
Maker00064384		80	115	Phytohormone responsive
Maker00064384		701	736	Phytohormone responsive
Maker00064384		1713	1748	Phytohormone responsive
Maker00064384		1893	1928	Phytohormone responsive
Maker00064771		1979	2014	Phytohormone responsive
Maker00069778		1770	1805	Phytohormone responsive
Maker00069778		1777	1812	Phytohormone responsive
Maker00070435		116	151	Phytohormone responsive
Maker00070435		214	249	Phytohormone responsive
Maker00070435		702	737	Phytohormone responsive
Maker00070435		1266	1301	Phytohormone responsive
Maker00070435		1586	1621	Phytohormone responsive
Maker00071140		1611	1646	Phytohormone responsive
Maker00073713		836	871	Phytohormone responsive
Maker00074209		1052	1087	Phytohormone responsive
Maker00074209		1097	1132	Phytohormone responsive
Maker00074209		1741	1776	Phytohormone responsive
Maker00074910		897	932	Phytohormone responsive
Maker00074910		943	978	Phytohormone responsive
Maker00075081		1183	1218	Phytohormone responsive
Maker00075096		85	120	Phytohormone responsive
Maker00075096		1808	1843	Phytohormone responsive
Maker00076242		1689	1724	Phytohormone responsive
Maker00076242		1703	1738	Phytohormone responsive
Maker00077507		143	178	Phytohormone responsive
Maker00077582		493	528	Phytohormone responsive
Maker00077582		730	765	Phytohormone responsive
Maker00077681		69	104	Phytohormone responsive
Maker00078039		1183	1218	Phytohormone responsive
Maker00078039		1189	1224	Phytohormone responsive
Maker00078039		1735	1770	Phytohormone responsive
Maker00079308		737	772	Phytohormone responsive
Maker00079308		1819	1854	Phytohormone responsive
Maker00080492		816	851	Phytohormone responsive
Maker00082380		262	297	Phytohormone responsive
Maker00088387		717	752	Phytohormone responsive
Maker00088387		1018	1053	Phytohormone responsive
Maker00088387		1822	1857	Phytohormone responsive
Maker00092999		9	44	Phytohormone responsive
Maker00092999		211	246	Phytohormone responsive
Maker00092999		1182	1217	Phytohormone responsive
Maker00092999		1188	1223	Phytohormone responsive
Maker00092999		1738	1773	Phytohormone responsive
Maker00096083		355	390	Phytohormone responsive
Maker00096083		413	448	Phytohormone responsive
Maker00096083		1436	1471	Phytohormone responsive
Gene.14270		1720	1759	Phytohormone responsive
Gene.14281		215	254	Phytohormone responsive
Maker00000445		1580	1619	Phytohormone responsive
Maker00003283		1825	1864	Phytohormone responsive
Maker00008224		891	930	Phytohormone responsive
Maker00013927		1635	1674	Phytohormone responsive
Maker00017564		1783	1822	Phytohormone responsive
Maker00025486		550	589	Phytohormone responsive
Maker00039158		1759	1798	Phytohormone responsive
Maker00039158		1786	1825	Phytohormone responsive
Maker00039158		1929	1968	Phytohormone responsive
Maker00041241		78	117	Phytohormone responsive
Maker00041241		732	771	Phytohormone responsive
Maker00043827		146	185	Phytohormone responsive
Maker00043827		861	900	Phytohormone responsive
Maker00043827		972	1012	Phytohormone responsive
Maker00047381		544	583	Phytohormone responsive
Maker00059396		610	649	Phytohormone responsive
Maker00060678		546	585	Phytohormone responsive
Maker00060678		896	935	Phytohormone responsive
Maker00064087		173	212	Phytohormone responsive
Maker00069778		372	411	Phytohormone responsive
Maker00069778		747	786	Phytohormone responsive
Maker00069778		808	847	Phytohormone responsive
Maker00070435		519	558	Phytohormone responsive
Maker00074209		1539	1578	Phytohormone responsive
Maker00074910		1324	1363	Phytohormone responsive
Maker00075081		1008	1047	Phytohormone responsive
Maker00075081		1366	1405	Phytohormone responsive
Maker00077582		1089	1128	Phytohormone responsive
Maker00077681		852	891	Phytohormone responsive
Maker00077681		1166	1205	Phytohormone responsive
Maker00077681		1427	1466	Phytohormone responsive
Maker00079308		1615	1654	Phytohormone responsive
Maker00080492		244	283	Phytohormone responsive
Maker00080492		1358	1397	Phytohormone responsive
Maker00084561		625	664	Phytohormone responsive
Maker00084561		894	933	Phytohormone responsive
Maker00084561		1076	1115	Phytohormone responsive
Maker00084561		1445	1484	Phytohormone responsive
Maker00088387		1620	1659	Phytohormone responsive
Maker00092999		1484	1523	Phytohormone responsive
Maker00096083		1787	1826	Phytohormone responsive
Gene.14281		663	699	Phytohormone responsive
Gene.14281		1133	1169	Phytohormone responsive
Gene.14283		62	98	Phytohormone responsive
Gene.14283		532	568	Phytohormone responsive
Maker00000056		1139	1175	Phytohormone responsive
Maker00000445		439	475	Phytohormone responsive
Maker00000768		834	870	Phytohormone responsive
Maker00003406		103	139	Phytohormone responsive
Maker00003406		511	547	Phytohormone responsive
Maker00024930		1425	1461	Phytohormone responsive
Maker00047149		113	149	Phytohormone responsive
Maker00047149		515	551	Phytohormone responsive
Maker00058256		340	376	Phytohormone responsive
Maker00058256		1113	1149	Phytohormone responsive
Maker00059396		1413	1449	Phytohormone responsive
Maker00070084		90	126	Phytohormone responsive
Maker00071140		1404	1440	Phytohormone responsive
Maker00073713		52	88	Phytohormone responsive
Maker00074209		1552	1588	Phytohormone responsive
Maker00075096		893	929	Phytohormone responsive
Maker00076242		758	794	Phytohormone responsive
Maker00077507		65	101	Phytohormone responsive
Maker00077582		201	237	Phytohormone responsive
Maker00077582		220	256	Phytohormone responsive
Maker00077582		238	274	Phytohormone responsive
Maker00077582		255	291	Phytohormone responsive
Maker00077582		274	310	Phytohormone responsive
Maker00077582		309	345	Phytohormone responsive
Maker00077582		531	567	Phytohormone responsive
Maker00077582		550	586	Phytohormone responsive
Maker00077582		567	603	Phytohormone responsive
Maker00077582		584	620	Phytohormone responsive
Maker00077582		601	637	Phytohormone responsive
Maker00077582		637	673	Phytohormone responsive
Maker00077582		691	727	Phytohormone responsive
Maker00077582		1005	1041	Phytohormone responsive
Maker00077681		759	795	Phytohormone responsive
Maker00077681		900	936	Phytohormone responsive
Maker00079308		1263	1299	Phytohormone responsive
Maker00080492		473	509	Phytohormone responsive
Maker00080492		1478	1514	Phytohormone responsive
Maker00080492		1486	1522	Phytohormone responsive
Maker00088387		1232	1268	Phytohormone responsive
Maker00096083		449	485	Phytohormone responsive
Maker00003406		1578	1615	Phytohormone responsive
Maker00012805		414	451	Phytohormone responsive
Maker00012805		841	878	Phytohormone responsive
Maker00013013		332	369	Phytohormone responsive
Maker00017564		882	919	Phytohormone responsive
Maker00017564		1111	1148	Phytohormone responsive
Maker00024930		333	370	Phytohormone responsive
Maker00025486		1954	1991	Phytohormone responsive
Maker00040205		1584	1621	Phytohormone responsive
Maker00042305		368	405	Phytohormone responsive
Maker00047149		1576	1613	Phytohormone responsive
Maker00047381		177	214	Phytohormone responsive
Maker00053039		1995	2032	Phytohormone responsive
Maker00058256		622	659	Phytohormone responsive
Maker00069778		86	123	Phytohormone responsive
Maker00069778		1073	1110	Phytohormone responsive
Maker00070435		1954	1991	Phytohormone responsive
Maker00071140		304	341	Phytohormone responsive
Maker00074910		1721	1758	Phytohormone responsive
Maker00075096		1583	1620	Phytohormone responsive
Maker00077507		581	618	Phytohormone responsive
Maker00078039		1280	1317	Phytohormone responsive
Maker00089270		81	118	Phytohormone responsive
Maker00092999		702	739	Phytohormone responsive
Maker00092999		1280	1317	Phytohormone responsive
Maker00096083		1123	1160	Phytohormone responsive
Maker00000056		1115	1152	Phytohormone responsive
Maker00008224		1220	1257	Phytohormone responsive
Maker00058256		1525	1562	Phytohormone responsive
Maker00060678		1223	1260	Phytohormone responsive
Maker00065350		1291	1328	Phytohormone responsive
Maker00065350		1319	1356	Phytohormone responsive
Maker00077582		1212	1249	Phytohormone responsive
Maker00077681		1375	1412	Phytohormone responsive
Maker00079308		952	989	Phytohormone responsive
Maker00082380		1237	1274	Phytohormone responsive
Maker00084561		1072	1109	Phytohormone responsive
Maker00088387		928	965	Phytohormone responsive
Gene.14281		635	670	Phytohormone responsive
Gene.14283		34	69	Phytohormone responsive
Maker00000056		454	489	Phytohormone responsive
Maker00000056		1594	1629	Phytohormone responsive
Maker00000768		827	862	Phytohormone responsive
Maker00003204		1485	1520	Phytohormone responsive
Maker00003283		1710	1745	Phytohormone responsive
Maker00003346		1493	1528	Phytohormone responsive
Maker00003406		1248	1283	Phytohormone responsive
Maker00003406		1784	1819	Phytohormone responsive
Maker00003406		1816	1851	Phytohormone responsive
Maker00006282		656	691	Phytohormone responsive
Maker00006282		858	893	Phytohormone responsive
Maker00012805		642	677	Phytohormone responsive
Maker00012805		1972	2007	Phytohormone responsive
Maker00013013		205	240	Phytohormone responsive
Maker00013013		619	654	Phytohormone responsive
Maker00013927		1454	1489	Phytohormone responsive
Maker00017564		354	389	Phytohormone responsive
Maker00017564		412	447	Phytohormone responsive
Maker00017564		1434	1469	Phytohormone responsive
Maker00024930		1627	1662	Phytohormone responsive
Maker00025486		147	182	Phytohormone responsive
Maker00025486		733	768	Phytohormone responsive
Maker00025486		960	995	Phytohormone responsive
Maker00025486		1286	1321	Phytohormone responsive
Maker00025486		1602	1637	Phytohormone responsive
Maker00038000		1108	1143	Phytohormone responsive
Maker00041241		39	74	Phytohormone responsive
Maker00041241		1572	1607	Phytohormone responsive
Maker00042305		1616	1651	Phytohormone responsive
Maker00043827		1108	1143	Phytohormone responsive
Maker00043827		1510	1545	Phytohormone responsive
Maker00047149		1244	1279	Phytohormone responsive
Maker00047149		1784	1819	Phytohormone responsive
Maker00047149		1816	1851	Phytohormone responsive
Maker00047381		112	147	Phytohormone responsive
Maker00047381		1671	1706	Phytohormone responsive
Maker00053039		771	806	Phytohormone responsive
Maker00053039		1966	2001	Phytohormone responsive
Maker00059396		167	202	Phytohormone responsive
Maker00062515		248	283	Phytohormone responsive
Maker00062719		212	247	Phytohormone responsive
Maker00062719		1306	1341	Phytohormone responsive
Maker00062719		1529	1564	Phytohormone responsive
Maker00062719		1745	1780	Phytohormone responsive
Maker00062719		1757	1792	Phytohormone responsive
Maker00064087		531	566	Phytohormone responsive
Maker00064384		80	115	Phytohormone responsive
Maker00064384		701	736	Phytohormone responsive
Maker00064384		1713	1748	Phytohormone responsive
Maker00064384		1893	1928	Phytohormone responsive
Maker00064771		1979	2014	Phytohormone responsive
Maker00069778		1770	1805	Phytohormone responsive
Maker00069778		1777	1812	Phytohormone responsive
Maker00070435		116	151	Phytohormone responsive
Maker00070435		214	249	Phytohormone responsive
Maker00070435		702	737	Phytohormone responsive
Maker00070435		1266	1301	Phytohormone responsive
Maker00070435		1586	1621	Phytohormone responsive
Maker00071140		1611	1646	Phytohormone responsive
Maker00073713		836	871	Phytohormone responsive
Maker00074209		1052	1087	Phytohormone responsive
Maker00074209		1097	1132	Phytohormone responsive
Maker00074209		1741	1776	Phytohormone responsive
Maker00074910		897	932	Phytohormone responsive
Maker00074910		943	978	Phytohormone responsive
Maker00075081		1183	1218	Phytohormone responsive
Maker00075096		85	120	Phytohormone responsive
Maker00075096		1808	1843	Phytohormone responsive
Maker00076242		1689	1724	Phytohormone responsive
Maker00076242		1703	1738	Phytohormone responsive
Maker00077507		143	178	Phytohormone responsive
Maker00077582		493	528	Phytohormone responsive
Maker00077582		730	765	Phytohormone responsive
Maker00077681		69	104	Phytohormone responsive
Maker00078039		1183	1218	Phytohormone responsive
Maker00078039		1189	1224	Phytohormone responsive
Maker00078039		1735	1770	Phytohormone responsive
Maker00079308		737	772	Phytohormone responsive
Maker00079308		1819	1854	Phytohormone responsive
Maker00080492		816	851	Phytohormone responsive
Maker00082380		262	297	Phytohormone responsive
Maker00088387		717	752	Phytohormone responsive
Maker00088387		1018	1053	Phytohormone responsive
Maker00088387		1822	1857	Phytohormone responsive
Maker00092999		9	44	Phytohormone responsive
Maker00092999		211	246	Phytohormone responsive
Maker00092999		1182	1217	Phytohormone responsive
Maker00092999		1188	1223	Phytohormone responsive
Maker00092999		1738	1773	Phytohormone responsive
Maker00096083		355	390	Phytohormone responsive
Maker00096083		413	448	Phytohormone responsive
Maker00096083		1436	1471	Phytohormone responsive
Maker00003204		129	166	Phytohormone responsive
Maker00069778		916	953	Phytohormone responsive
Maker00075081		906	943	Phytohormone responsive
Maker00003406		1938	1975	Phytohormone responsive
Maker00013013		1285	1322	Phytohormone responsive
Maker00017564		1969	2006	Phytohormone responsive
Maker00058256		1398	1435	Phytohormone responsive
Maker00058256		1851	1888	Phytohormone responsive
Maker00069778		1906	1943	Phytohormone responsive
Maker00074910		1623	1660	Phytohormone responsive
Maker00096083		1969	2006	Phytohormone responsive
Maker00000056		914	950	Stress responsive
Maker00000056		1844	1880	Stress responsive
Maker00000056		1878	1914	Stress responsive
Maker00000445		1940	1976	Stress responsive
Maker00003346		910	946	Stress responsive
Maker00003406		1181	1217	Stress responsive
Maker00006282		265	301	Stress responsive
Maker00006282		1317	1353	Stress responsive
Maker00008224		339	375	Stress responsive
Maker00013013		1658	1694	Stress responsive
Maker00016870		30	66	Stress responsive
Maker00025486		726	762	Stress responsive
Maker00025486		1691	1727	Stress responsive
Maker00042305		1056	1092	Stress responsive
Maker00043827		992	1028	Stress responsive
Maker00047149		1177	1213	Stress responsive
Maker00053039		195	231	Stress responsive
Maker00060678		293	329	Stress responsive
Maker00062515		1456	1492	Stress responsive
Maker00062719		700	736	Stress responsive
Maker00064384		644	680	Stress responsive
Maker00064771		1218	1254	Stress responsive
Maker00065350		1275	1311	Stress responsive
Maker00069778		1055	1091	Stress responsive
Maker00070084		1739	1775	Stress responsive
Maker00070435		695	731	Stress responsive
Maker00070435		1681	1717	Stress responsive
Maker00073713		394	430	Stress responsive
Maker00077507		993	1029	Stress responsive
Maker00077681		1692	1728	Stress responsive
Maker00078039		1495	1531	Stress responsive
Maker00079308		209	245	Stress responsive
Maker00082380		884	920	Stress responsive
Maker00084561		451	487	Stress responsive
Maker00088387		189	225	Stress responsive
Maker00092999		1496	1532	Stress responsive
Gene.14270		1526	1566	Stress responsive
Gene.14270		1790	1829	Stress responsive
Gene.14270		1898	1936	Stress responsive
Gene.14281		21	61	Stress responsive
Gene.14281		285	324	Stress responsive
Gene.14281		393	431	Stress responsive
Gene.14281		1244	1283	Stress responsive
Gene.14283		643	682	Stress responsive
Maker00000445		196	235	Stress responsive
Maker00000445		949	988	Stress responsive
Maker00003204		422	461	Stress responsive
Maker00003406		1453	1492	Stress responsive
Maker00012805		1198	1237	Stress responsive
Maker00012805		1904	1943	Stress responsive
Maker00013013		1228	1267	Stress responsive
Maker00016870		1510	1548	Stress responsive
Maker00016870		1565	1604	Stress responsive
Maker00016870		1763	1802	Stress responsive
Maker00025486		332	371	Stress responsive
Maker00038000		1110	1149	Stress responsive
Maker00040205		215	254	Stress responsive
Maker00043827		353	392	Stress responsive
Maker00047149		1451	1490	Stress responsive
Maker00058256		930	969	Stress responsive
Maker00062515		545	584	Stress responsive
Maker00062515		1117	1156	Stress responsive
Maker00070084		336	375	Stress responsive
Maker00070435		301	340	Stress responsive
Maker00070435		1526	1565	Stress responsive
Maker00070435		1561	1600	Stress responsive
Maker00073713		1480	1519	Stress responsive
Maker00075081		1003	1042	Stress responsive
Maker00075096		410	449	Stress responsive
Maker00077582		727	766	Stress responsive
Maker00079308		1816	1855	Stress responsive
Maker00080492		770	809	Stress responsive
Maker00082380		843	881	Stress responsive
Maker00083407		331	370	Stress responsive
Maker00088387		1819	1858	Stress responsive
Gene.14270		549	586	Stress responsive
Maker00000056		32	69	Stress responsive
Maker00017564		7	44	Stress responsive
Maker00025486		1560	1597	Stress responsive
Maker00038000		1197	1234	Stress responsive
Maker00047381		19	56	Stress responsive
Maker00062719		473	510	Stress responsive
Maker00064771		192	229	Stress responsive
Maker00064771		1601	1638	Stress responsive
Maker00070435		1543	1580	Stress responsive
Maker00074910		936	973	Stress responsive
Maker00075096		1497	1534	Stress responsive
Maker00077507		1923	1960	Stress responsive
Maker00077681		528	565	Stress responsive
Maker00080492		324	361	Stress responsive
Maker00096083		19	56	Stress responsive
Gene.14270		1270	1309	Stress responsive
Maker00000056		1620	1659	Stress responsive
Maker00003204		1513	1552	Stress responsive
Maker00003204		1580	1619	Stress responsive
Maker00003283		1216	1255	Stress responsive
Maker00006282		1142	1181	Stress responsive
Maker00058256		1905	1944	Stress responsive
Maker00065350		1015	1054	Stress responsive
Maker00082380		1570	1609	Stress responsive
Maker00089270		770	809	Stress responsive
Maker00003204		254	292	Stress responsive
Maker00003204		1475	1513.5	Stress responsive
Maker00074209		1829	1867	Stress responsive
Maker00084561		686	724	Stress responsive
Maker00084561		690	728	Stress responsive
Maker00000056		780	816	Plant growth
Maker00000056		1277	1313	Plant growth
Maker00003204		1320	1356	Plant growth
Maker00003204		1654	1690	Plant growth
Maker00003283		937	973	Plant growth
Maker00008224		1450	1486	Plant growth
Maker00017564		163	199	Plant growth
Maker00017564		305	341	Plant growth
Maker00025486		1177	1213	Plant growth
Maker00039158		1509	1545	Plant growth
Maker00041241		1627	1663	Plant growth
Maker00042305		303	339	Plant growth
Maker00042305		1793	1829	Plant growth
Maker00059396		1711	1747	Plant growth
Maker00060678		1453	1489	Plant growth
Maker00062719		1741	1777	Plant growth
Maker00070435		1157	1193	Plant growth
Maker00074910		347	383	Plant growth
Maker00077507		1786	1822	Plant growth
Maker00077681		1737	1773	Plant growth
Maker00078039		1689	1725	Plant growth
Maker00080492		819	855	Plant growth
Maker00089270		868	904	Plant growth
Maker00089270		1506	1542	Plant growth
Maker00092999		1689	1725	Plant growth
Maker00096083		175	211	Plant growth
Maker00096083		306	342	Plant growth
Gene.14270		9	45	Plant growth
Gene.14270		870	906	Plant growth
Gene.14281		736	772	Plant growth
Gene.14281		859	895	Plant growth
Gene.14283		135	171	Plant growth
Gene.14283		258	294	Plant growth
Maker00000056		67	103	Plant growth
Maker00000056		536	572	Plant growth
Maker00000056		1766	1802	Plant growth
Maker00000056		1787	1823	Plant growth
Maker00000056		1851	1887	Plant growth
Maker00000445		118	154	Plant growth
Maker00000445		129	165	Plant growth
Maker00000445		387	423	Plant growth
Maker00000768		1844	1880	Plant growth
Maker00000768		1861	1897	Plant growth
Maker00003204		1136	1172	Plant growth
Maker00003204		1260	1296	Plant growth
Maker00003283		479	515	Plant growth
Maker00003283		1004	1040	Plant growth
Maker00003406		747	783	Plant growth
Maker00006282		1511	1547	Plant growth
Maker00006282		1734	1770	Plant growth
Maker00006282		1742	1778	Plant growth
Maker00006282		1747	1783	Plant growth
Maker00006282		1836	1872	Plant growth
Maker00008224		279	315	Plant growth
Maker00008224		1634	1670	Plant growth
Maker00008224		1640	1676	Plant growth
Maker00008224		1733	1769	Plant growth
Maker00012805		554	590	Plant growth
Maker00013013		414	450	Plant growth
Maker00013013		1225	1261	Plant growth
Maker00013013		1583	1619	Plant growth
Maker00013013		1825	1861	Plant growth
Maker00016870		707	743	Plant growth
Maker00016870		1691	1727	Plant growth
Maker00017564		780	816	Plant growth
Maker00017564		1037	1073	Plant growth
Maker00024930		637	673	Plant growth
Maker00024930		679	715	Plant growth
Maker00024930		1116	1152	Plant growth
Maker00024930		1404	1440	Plant growth
Maker00024930		1466	1502	Plant growth
Maker00038000		413	449	Plant growth
Maker00038000		650	686	Plant growth
Maker00038000		1189	1225	Plant growth
Maker00038000		1784	1820	Plant growth
Maker00038000		1799	1835	Plant growth
Maker00040205		1204	1240	Plant growth
Maker00043827		810	846	Plant growth
Maker00047149		749	785	Plant growth
Maker00047381		1121	1157	Plant growth
Maker00058256		1066	1102	Plant growth
Maker00058256		1648	1684	Plant growth
Maker00058256		1978	2014	Plant growth
Maker00059396		1579	1615	Plant growth
Maker00060678		233	269	Plant growth
Maker00060678		1636	1672	Plant growth
Maker00060678		1642	1678	Plant growth
Maker00060678		1735	1771	Plant growth
Maker00062515		475	511	Plant growth
Maker00062515		1146	1182	Plant growth
Maker00062515		1727	1763	Plant growth
Maker00062515		1885	1921	Plant growth
Maker00064087		522	558	Plant growth
Maker00064087		1439	1475	Plant growth
Maker00064087		1652	1688	Plant growth
Maker00064384		1182	1218	Plant growth
Maker00064384		1308	1344	Plant growth
Maker00064771		178	214	Plant growth
Maker00064771		694	730	Plant growth
Maker00064771		1484	1520	Plant growth
Maker00065350		542	578	Plant growth
Maker00065350		589	625	Plant growth
Maker00069778		310	346	Plant growth
Maker00069778		1277	1313	Plant growth
Maker00071140		599	635	Plant growth
Maker00071140		641	677	Plant growth
Maker00071140		1070	1106	Plant growth
Maker00071140		1383	1419	Plant growth
Maker00071140		1445	1481	Plant growth
Maker00073713		767	803	Plant growth
Maker00073713		788	824	Plant growth
Maker00073713		1124	1160	Plant growth
Maker00073713		1373	1409	Plant growth
Maker00073713		1552	1588	Plant growth
Maker00073713		1667	1703	Plant growth
Maker00073713		1780	1816	Plant growth
Maker00074209		594	630	Plant growth
Maker00075096		1671	1707	Plant growth
Maker00075096		1986	2022	Plant growth
Maker00076242		950	986	Plant growth
Maker00076242		1546	1582	Plant growth
Maker00077507		437	473	Plant growth
Maker00077507		1153	1189	Plant growth
Maker00077507		1399	1435	Plant growth
Maker00077507		1847	1883	Plant growth
Maker00077582		710	746	Plant growth
Maker00077582		1643	1679	Plant growth
Maker00077582		1917	1953	Plant growth
Maker00077681		348	384	Plant growth
Maker00077681		1328	1364	Plant growth
Maker00077681		1918	1954	Plant growth
Maker00078039		442	478	Plant growth
Maker00078039		893	929	Plant growth
Maker00078039		1162	1198	Plant growth
Maker00078039		1390	1426	Plant growth
Maker00078039		1714	1750	Plant growth
Maker00079308		829	865	Plant growth
Maker00080492		54	90	Plant growth
Maker00080492		165	201	Plant growth
Maker00080492		221	257	Plant growth
Maker00082380		983	1019	Plant growth
Maker00082380		1334	1370	Plant growth
Maker00082380		1891	1927	Plant growth
Maker00084561		1551	1587	Plant growth
Maker00084561		1572	1608	Plant growth
Maker00084561		1646	1682	Plant growth
Maker00088387		805	841	Plant growth
Maker00089270		251	287	Plant growth
Maker00089270		261	297	Plant growth
Maker00089270		606	642	Plant growth
Maker00089270		819	855	Plant growth
Maker00089270		1349	1385	Plant growth
Maker00089270		1407	1443	Plant growth
Maker00089270		1550	1586	Plant growth
Maker00089270		1558	1594	Plant growth
Maker00089270		1965	2001	Plant growth
Maker00092999		444	480	Plant growth
Maker00092999		895	931	Plant growth
Maker00092999		1390	1426	Plant growth
Maker00092999		1714	1750	Plant growth
Maker00096083		789	825	Plant growth
Maker00096083		1049	1085	Plant growth
Maker00000768		190	226	Plant growth
Maker00003406		312	348	Plant growth
Maker00012805		617	653	Plant growth
Maker00038000		1866	1902	Plant growth
Maker00038000		1879	1915	Plant growth
Maker00038000		1911	1947	Plant growth
Maker00041241		800	836	Plant growth
Maker00047149		322	358	Plant growth
Maker00058256		446	482	Plant growth
Maker00058256		718	754	Plant growth
Maker00058256		1838	1874	Plant growth
Maker00064087		1422	1458	Plant growth
Maker00064771		284	320	Plant growth
Maker00064771		922	958	Plant growth
Maker00065350		399	435	Plant growth
Maker00065350		1841	1877	Plant growth
Maker00073713		785	821	Plant growth
Maker00073713		894	930	Plant growth
Maker00074209		919	955	Plant growth
Maker00077507		494	530	Plant growth
Maker00079308		1182	1218	Plant growth
Maker00080492		1810	1846	Plant growth
Maker00084561		383	419	Plant growth
Maker00088387		1151	1187	Plant growth
Maker00003204		1307	1346	Plant growth
Maker00003283		762	801	Plant growth
Maker00003283		1830	1869	Plant growth
Maker00003346		414	453	Plant growth
Maker00006282		116	155	Plant growth
Maker00008224		1752	1791	Plant growth
Maker00013927		641	680	Plant growth
Maker00040205		579	618	Plant growth
Maker00040205		1098	1137	Plant growth
Maker00047381		1054	1093	Plant growth
Maker00060678		1754	1793	Plant growth
Maker00073713		1177	1216	Plant growth
Maker00074209		886	925	Plant growth
Maker00074910		451	490	Plant growth
Maker00075096		288	328	Plant growth
Maker00077507		68	107	Plant growth
Maker00077507		170	209	Plant growth
Maker00077507		470	509	Plant growth
Maker00077507		763	802	Plant growth
Maker00077582		241	280	Plant growth
Maker00077681		218	257	Plant growth
Maker00077681		950	989	Plant growth
Maker00078039		1765	1804	Plant growth
Maker00078039		1839	1878	Plant growth
Maker00092999		1765	1804	Plant growth
Maker00092999		1839	1878	Plant growth
Maker00096083		1170	1209	Plant growth
Maker00000056		232	270	Plant growth
Maker00003283		844	883	Plant growth
Maker00003346		76	115	Plant growth
Maker00003346		1729	1768	Plant growth
Maker00006282		164	203	Plant growth
Maker00006282		193	232	Plant growth
Maker00006282		196	235	Plant growth
Maker00008224		76	114	Plant growth
Maker00008224		700	739	Plant growth
Maker00008224		703	742	Plant growth
Maker00012805		1498	1537	Plant growth
Maker00013013		98	137	Plant growth
Maker00013013		304	343	Plant growth
Maker00013013		1033	1071	Plant growth
Maker00016870		557	596	Plant growth
Maker00016870		663	702	Plant growth
Maker00016870		1623	1662	Plant growth
Maker00017564		1241	1280	Plant growth
Maker00024930		137	175	Plant growth
Maker00024930		1558	1597	Plant growth
Maker00025486		1290	1329	Plant growth
Maker00038000		1530	1569	Plant growth
Maker00038000		1531	1569	Plant growth
Maker00040205		513	552	Plant growth
Maker00040205		672	711	Plant growth
Maker00040205		693	732	Plant growth
Maker00040205		923	961	Plant growth
Maker00042305		894	933	Plant growth
Maker00047381		661	700	Plant growth
Maker00053039		1675	1714	Plant growth
Maker00060678		22	60	Plant growth
Maker00060678		690	729	Plant growth
Maker00060678		693	732	Plant growth
Maker00062515		1239	1278	Plant growth
Maker00064087		579	618	Plant growth
Maker00064771		1089	1128	Plant growth
Maker00064771		1723	1762	Plant growth
Maker00064771		1792	1831	Plant growth
Maker00065350		414	452	Plant growth
Maker00069778		69	107	Plant growth
Maker00070435		1270	1309	Plant growth
Maker00071140		108	146	Plant growth
Maker00074910		1308	1347	Plant growth
Maker00074910		1843	1882	Plant growth
Maker00075081		630	669	Plant growth
Maker00076242		219	258	Plant growth
Maker00076242		222	261	Plant growth
Maker00076242		297	336	Plant growth
Maker00076242		492	530	Plant growth
Maker00077681		79	117	Plant growth
Maker00078039		755	794	Plant growth
Maker00079308		558	596	Plant growth
Maker00079308		1115	1154	Plant growth
Maker00080492		10	49	Plant growth
Maker00082380		1328	1367	Plant growth
Maker00088387		538	576	Plant growth
Maker00089270		1526	1565	Plant growth
Maker00092999		758	797	Plant growth
Maker00000768		1370	1407	Light responsive
Maker00000768		1700	1737	Light responsive
Maker00003346		365	402	Light responsive
Maker00003346		589	626	Light responsive
Maker00008224		57	94	Light responsive
Maker00008224		64	101	Light responsive
Maker00017564		1011	1048	Light responsive
Maker00017564		1126	1163	Light responsive
Maker00039158		185	222	Light responsive
Maker00039158		527	564	Light responsive
Maker00060678		10	47	Light responsive
Maker00064771		1159	1196	Light responsive
Maker00069778		1539	1576	Light responsive
Maker00069778		1731	1768	Light responsive
Maker00075081		149	186	Light responsive
Maker00077507		1361	1398	Light responsive
Maker00077681		984	1021	Light responsive
Gene.14270		204	240	Light responsive
Gene.14270		1082	1118	Light responsive
Gene.14270		1380	1416	Light responsive
Maker00000056		202	238	Light responsive
Maker00000056		339	375	Light responsive
Maker00000056		399	435	Light responsive
Maker00000056		470	506	Light responsive
Maker00000056		792	828	Light responsive
Maker00000056		977	1013	Light responsive
Maker00000445		682	718	Light responsive
Maker00000445		941	977	Light responsive
Maker00000445		1154	1190	Light responsive
Maker00000768		629	665	Light responsive
Maker00000768		718	754	Light responsive
Maker00000768		1195	1231	Light responsive
Maker00000768		1252	1288	Light responsive
Maker00000768		1481	1517	Light responsive
Maker00000768		1530	1566	Light responsive
Maker00000768		1659	1695	Light responsive
Maker00003204		45	81	Light responsive
Maker00003204		271	307	Light responsive
Maker00003204		385	421	Light responsive
Maker00003204		1980	2016	Light responsive
Maker00003283		560	596	Light responsive
Maker00003283		744	780	Light responsive
Maker00003283		956	992	Light responsive
Maker00003283		1376	1412	Light responsive
Maker00003283		1395	1431	Light responsive
Maker00003283		1668	1704	Light responsive
Maker00003283		1672	1708	Light responsive
Maker00003346		102	138	Light responsive
Maker00003346		171	207	Light responsive
Maker00003346		213	249	Light responsive
Maker00003346		538	574	Light responsive
Maker00003406		71	107	Light responsive
Maker00003406		339	375	Light responsive
Maker00003406		1011	1047	Light responsive
Maker00003406		1653	1689	Light responsive
Maker00006282		293	329	Light responsive
Maker00006282		784	820	Light responsive
Maker00006282		1724	1760	Light responsive
Maker00008224		49	85	Light responsive
Maker00008224		138	174	Light responsive
Maker00008224		490	526	Light responsive
Maker00008224		494	530	Light responsive
Maker00008224		812	848	Light responsive
Maker00008224		1137	1173	Light responsive
Maker00008224		1409	1445	Light responsive
Maker00012805		1076	1112	Light responsive
Maker00012805		1249	1285	Light responsive
Maker00012805		1769	1805	Light responsive
Maker00013013		103	139	Light responsive
Maker00013013		424	460	Light responsive
Maker00013013		1323	1359	Light responsive
Maker00013013		1537	1573	Light responsive
Maker00013927		1191	1227	Light responsive
Maker00016870		358	394	Light responsive
Maker00017564		1081	1117	Light responsive
Maker00017564		1317	1353	Light responsive
Maker00017564		1996	2032	Light responsive
Maker00024930		424	460	Light responsive
Maker00024930		603	639	Light responsive
Maker00024930		643	679	Light responsive
Maker00024930		728	764	Light responsive
Maker00024930		856	892	Light responsive
Maker00024930		1431	1467	Light responsive
Maker00024930		1499	1535	Light responsive
Maker00038000		846	882	Light responsive
Maker00039158		215	251	Light responsive
Maker00039158		1095	1131	Light responsive
Maker00039158		1232	1268	Light responsive
Maker00039158		1465	1501	Light responsive
Maker00039158		1579	1615	Light responsive
Maker00040205		606	642	Light responsive
Maker00040205		1922	1958	Light responsive
Maker00041241		711	747	Light responsive
Maker00041241		1430	1466	Light responsive
Maker00042305		32	68	Light responsive
Maker00042305		58	94	Light responsive
Maker00042305		130	166	Light responsive
Maker00042305		212	248	Light responsive
Maker00042305		230	266	Light responsive
Maker00042305		349	385	Light responsive
Maker00042305		1524	1560	Light responsive
Maker00042305		1559	1595	Light responsive
Maker00042305		1590	1626	Light responsive
Maker00042305		1694	1730	Light responsive
Maker00042305		1962	1998	Light responsive
Maker00043827		1101	1137	Light responsive
Maker00043827		1560	1596	Light responsive
Maker00043827		1579	1615	Light responsive
Maker00047149		348	384	Light responsive
Maker00047149		1014	1050	Light responsive
Maker00047149		1653	1689	Light responsive
Maker00047381		937	973	Light responsive
Maker00047381		945	981	Light responsive
Maker00053039		1221	1257	Light responsive
Maker00053039		1582	1618	Light responsive
Maker00058256		519	555	Light responsive
Maker00058256		529	565	Light responsive
Maker00058256		552	588	Light responsive
Maker00058256		582	618	Light responsive
Maker00058256		591	627	Light responsive
Maker00058256		1104	1140	Light responsive
Maker00058256		1119	1155	Light responsive
Maker00058256		1292	1328	Light responsive
Maker00058256		1495	1531	Light responsive
Maker00058256		1775	1811	Light responsive
Maker00059396		139	175	Light responsive
Maker00059396		202	238	Light responsive
Maker00059396		824	860	Light responsive
Maker00059396		1008	1044	Light responsive
Maker00059396		1221	1257	Light responsive
Maker00059396		1702	1738	Light responsive
Maker00060678		84	120	Light responsive
Maker00060678		445	481	Light responsive
Maker00060678		449	485	Light responsive
Maker00060678		802	838	Light responsive
Maker00060678		1142	1178	Light responsive
Maker00060678		1412	1448	Light responsive
Maker00062515		820	856	Light responsive
Maker00062719		1001	1037	Light responsive
Maker00064087		1230	1266	Light responsive
Maker00064087		1482	1518	Light responsive
Maker00064087		1590	1626	Light responsive
Maker00064384		567	603	Light responsive
Maker00064384		907	943	Light responsive
Maker00064384		986	1022	Light responsive
Maker00064771		1523	1559	Light responsive
Maker00064771		1527	1563	Light responsive
Maker00064771		1555	1591	Light responsive
Maker00065350		168	204	Light responsive
Maker00065350		868	904	Light responsive
Maker00065350		1075	1111	Light responsive
Maker00065350		1120	1156	Light responsive
Maker00069778		147	183	Light responsive
Maker00069778		200	236	Light responsive
Maker00069778		207	243	Light responsive
Maker00069778		619	655	Light responsive
Maker00069778		623	659	Light responsive
Maker00069778		1359	1395	Light responsive
Maker00069778		1417	1453	Light responsive
Maker00069778		1678	1714	Light responsive
Maker00069778		1973	2009	Light responsive
Maker00071140		395	431	Light responsive
Maker00071140		567	603	Light responsive
Maker00071140		605	641	Light responsive
Maker00071140		690	726	Light responsive
Maker00071140		1410	1446	Light responsive
Maker00071140		1479	1515	Light responsive
Maker00073713		327	363	Light responsive
Maker00073713		441	477	Light responsive
Maker00073713		1627	1663	Light responsive
Maker00074209		116	152	Light responsive
Maker00074209		486	522	Light responsive
Maker00074209		1192	1228	Light responsive
Maker00074209		1647	1683	Light responsive
Maker00074910		335	371	Light responsive
Maker00074910		618	654	Light responsive
Maker00074910		1073	1109	Light responsive
Maker00074910		1488	1524	Light responsive
Maker00075081		94	130	Light responsive
Maker00075081		102	138	Light responsive
Maker00075081		387	423	Light responsive
Maker00075081		529	565	Light responsive
Maker00075096		207	243	Light responsive
Maker00075096		351	387	Light responsive
Maker00075096		386	422	Light responsive
Maker00075096		622	658	Light responsive
Maker00075096		643	679	Light responsive
Maker00075096		1473	1509	Light responsive
Maker00076242		808	844	Light responsive
Maker00076242		1061	1097	Light responsive
Maker00076242		1415	1451	Light responsive
Maker00077507		107	143	Light responsive
Maker00077507		349	385	Light responsive
Maker00077507		373	409	Light responsive
Maker00077507		1369	1405	Light responsive
Maker00077582		815	851	Light responsive
Maker00077582		1650	1686	Light responsive
Maker00077582		1656	1692	Light responsive
Maker00077582		1774	1810	Light responsive
Maker00077681		1296	1332	Light responsive
Maker00077681		1639	1675	Light responsive
Maker00079308		710	746	Light responsive
Maker00082380		207	243	Light responsive
Maker00082380		1101	1137	Light responsive
Maker00082380		1703	1739	Light responsive
Maker00082380		1707	1743	Light responsive
Maker00084561		496	532	Light responsive
Maker00084561		1420	1456	Light responsive
Maker00084561		1589	1625	Light responsive
Maker00084561		1637	1673	Light responsive
Maker00088387		690	726	Light responsive
Maker00089270		767	803	Light responsive
Maker00089270		913	949	Light responsive
Maker00089270		1087	1123	Light responsive
Maker00089270		1336	1372	Light responsive
Maker00096083		1093	1129	Light responsive
Maker00096083		1320	1356	Light responsive
Maker00096083		1996	2032	Light responsive
Maker00000056		255	294	Light responsive
Maker00003346		419	458	Light responsive
Maker00038000		1576	1615	Light responsive
Maker00039158		179	218	Light responsive
Maker00040205		260	299	Light responsive
Maker00043827		1182	1221	Light responsive
Maker00062515		363	402	Light responsive
Maker00062515		1400	1439	Light responsive
Maker00064771		1304	1343	Light responsive
Maker00065350		390	429	Light responsive
Maker00065350		953	992	Light responsive
Maker00070435		642	681	Light responsive
Maker00073713		29	68	Light responsive
Maker00074209		1868	1907	Light responsive
Maker00075081		609	648	Light responsive
Maker00077507		1638	1677	Light responsive
Maker00078039		674	713	Light responsive
Maker00092999		676	715	Light responsive
Gene.14270		1006	1046	Light responsive
Gene.14281		1357	1397	Light responsive
Gene.14283		756	796	Light responsive
Maker00000056		393	430	Light responsive
Maker00000056		1698	1737	Light responsive
Maker00000445		36	76	Light responsive
Maker00003346		815	855	Light responsive
Maker00008224		413	450	Light responsive
Maker00024930		10	50	Light responsive
Maker00039158		1150	1187	Light responsive
Maker00039158		1545	1582	Light responsive
Maker00039158		1754	1791	Light responsive
Maker00040205		519	558	Light responsive
Maker00047381		342	379	Light responsive
Maker00047381		828	868	Light responsive
Maker00053039		100	140	Light responsive
Maker00060678		368	405	Light responsive
Maker00062515		237	276	Light responsive
Maker00064771		536	576	Light responsive
Maker00070084		1364	1401	Light responsive
Maker00074209		899	938	Light responsive
Maker00074910		1085	1124	Light responsive
Maker00074910		1086	1126	Light responsive
Maker00074910		1724	1763	Light responsive
Maker00076242		783	823	Light responsive
Maker00076242		1064	1104	Light responsive
Maker00076242		1850	1887	Light responsive
Maker00077507		484	524	Light responsive
Maker00077507		948	985	Light responsive
Maker00077582		1375	1415	Light responsive
Maker00083407		1362	1399	Light responsive
Maker00084561		634	674	Light responsive
Maker00084561		1242	1281	Light responsive
Maker00084561		1503	1540	Light responsive
Maker00089270		1804	1844	Light responsive
Maker00092999		101	140	Light responsive
Gene.14281		1325	1363	Light responsive
Gene.14283		724	762	Light responsive
Maker00003204		997	1035	Light responsive
Maker00003346		701	739	Light responsive
Maker00003406		7	45	Light responsive
Maker00013013		1807	1845	Light responsive
Maker00017564		624	662	Light responsive
Maker00017564		1633	1671	Light responsive
Maker00025486		1786	1824	Light responsive
Maker00040205		157	195	Light responsive
Maker00047149		12	50	Light responsive
Maker00062719		14	52	Light responsive
Maker00064087		1069	1107	Light responsive
Maker00070435		1776	1814	Light responsive
Maker00075096		376	414	Light responsive
Maker00075096		1722	1760	Light responsive
Maker00077507		1905	1943	Light responsive
Maker00078039		898	936	Light responsive
Maker00089270		532	570	Light responsive
Maker00089270		1474	1512	Light responsive
Maker00092999		900	938	Light responsive
Maker00096083		628	666	Light responsive
Maker00096083		1635	1673	Light responsive
Maker00000445		666	704	Light responsive
Maker00039158		725	763	Light responsive
Maker00064384		586	624	Light responsive
Maker00077582		1050	1088	Light responsive
Maker00082380		337	375	Light responsive
Maker00084561		262	300	Light responsive
Maker00089270		336	374	Light responsive
Gene.14281		1060	1096	Light responsive
Gene.14283		459	495	Light responsive
Maker00000445		623	659	Light responsive
Maker00000768		1212	1248	Light responsive
Maker00003204		1005	1041	Light responsive
Maker00003283		1834	1870	Light responsive
Maker00003346		1257	1293	Light responsive
Maker00006282		116	152	Light responsive
Maker00006282		191	227	Light responsive
Maker00006282		201	237	Light responsive
Maker00008224		999	1035	Light responsive
Maker00012805		1496	1532	Light responsive
Maker00013013		1451	1487	Light responsive
Maker00013927		1174	1210	Light responsive
Maker00017564		1287	1323	Light responsive
Maker00025486		1092	1128	Light responsive
Maker00038000		145	181	Light responsive
Maker00040205		583	619	Light responsive
Maker00040205		1098	1134	Light responsive
Maker00040205		1108	1144	Light responsive
Maker00041241		910	946	Light responsive
Maker00041241		1582	1618	Light responsive
Maker00060678		1004	1040	Light responsive
Maker00062515		294	330	Light responsive
Maker00069778		60	96	Light responsive
Maker00070084		1096	1132	Light responsive
Maker00070435		1062	1098	Light responsive
Maker00073713		61	97	Light responsive
Maker00074209		1857	1893	Light responsive
Maker00075081		1430	1466	Light responsive
Maker00075096		292	328	Light responsive
Maker00075096		538	574	Light responsive
Maker00076242		217	253	Light responsive
Maker00076242		302	338	Light responsive
Maker00077507		474	510	Light responsive
Maker00077507		1658	1694	Light responsive
Maker00079308		185	221	Light responsive
Maker00079308		262	298	Light responsive
Maker00080492		172	208	Light responsive
Maker00080492		892	928	Light responsive
Maker00083407		1093	1129	Light responsive
Maker00088387		165	201	Light responsive
Maker00088387		242	278	Light responsive
Maker00089270		1784	1820	Light responsive
Maker00096083		1290	1326	Light responsive
Maker00000445		589	628	Light responsive
Maker00003204		1633	1672	Light responsive
Maker00013013		1424	1463	Light responsive
Maker00017564		74	113	Light responsive
Maker00040205		1890	1929	Light responsive
Maker00043827		1225	1264	Light responsive
Maker00062719		1378	1417	Light responsive
Maker00064384		749	788	Light responsive
Maker00073713		992	1031	Light responsive
Maker00078039		911	950	Light responsive
Maker00080492		290	329	Light responsive
Maker00080492		747	786	Light responsive
Maker00092999		913	952	Light responsive
Maker00096083		86	125	Light responsive
Maker00000056		192	230	Light responsive
Maker00000445		1125	1163	Light responsive
Maker00003346		721	759	Light responsive
Maker00006282		12	50	Light responsive
Maker00016870		217	255	Light responsive
Maker00038000		619	657	Light responsive
Maker00047381		1746	1784	Light responsive
Maker00053039		6	44	Light responsive
Maker00064087		138	176	Light responsive
Maker00071140		823	861	Light responsive
Maker00074209		13	51	Light responsive
Maker00074910		1175	1213	Light responsive
Maker00084561		167	205	Light responsive
Gene.14281		1760	1799	Light responsive
Gene.14283		1159	1198	Light responsive
Maker00003346		1872	1912	Light responsive
Maker00003406		1584	1623	Light responsive
Maker00008224		1887	1927	Light responsive
Maker00012805		1905	1944	Light responsive
Maker00024930		523	562	Light responsive
Maker00025486		165	205	Light responsive
Maker00040205		519	558	Light responsive
Maker00042305		782	821	Light responsive
Maker00042305		1812	1851	Light responsive
Maker00043827		1217	1257	Light responsive
Maker00043827		1407	1445	Light responsive
Maker00047149		1582	1621	Light responsive
Maker00053039		1809	1849	Light responsive
Maker00060678		1887	1927	Light responsive
Maker00071140		494	533	Light responsive
Maker00074910		1086	1126	Light responsive
Maker00074910		1087	1125	Light responsive
Maker00077582		1148	1187	Light responsive
Maker00078039		100	140	Light responsive
Maker00078039		1897	1937	Light responsive
Maker00084561		466	506	Light responsive
Maker00084561		1240	1279	Light responsive
Maker00084561		1866	1904	Light responsive
Maker00092999		101	140	Light responsive
Maker00092999		303	343	Light responsive
Maker00092999		1897	1937	Light responsive
Maker00000445		245	283	Light responsive
Maker00003204		1879	1917	Light responsive
Maker00003283		855	893	Light responsive
Maker00003283		961	999	Light responsive
Maker00038000		1689	1727	Light responsive
Maker00042305		1471	1509	Light responsive
Maker00043827		1409	1447	Light responsive
Maker00047381		1734	1772	Light responsive
Maker00053039		459	497	Light responsive
Maker00064087		1303	1341	Light responsive
Maker00064771		1127	1165	Light responsive
Maker00065350		1088	1126	Light responsive
Maker00069778		864	902	Light responsive
Maker00069778		879	917	Light responsive
Maker00070084		1030	1068	Light responsive
Maker00075081		252	290	Light responsive
Maker00083407		1027	1065	Light responsive
Maker00003406		800	843	Light responsive
Maker00017564		1217	1260	Light responsive
Maker00079308		792	835	Light responsive
Maker00008224		1158	1194	Light responsive
Maker00047381		74	110	Light responsive
Maker00060678		1161	1197	Light responsive
Maker00062719		190	226	Light responsive
Maker00062719		1439	1475	Light responsive
Maker00073713		14	50	Light responsive
Maker00073713		106	142	Light responsive
Maker00073713		194	230	Light responsive
Maker00074209		1799	1835	Light responsive
Maker00074910		1188	1224	Light responsive
Maker00082380		1938	1974	Light responsive
Maker00092999		191	227	Light responsive
Maker00003406		1569	1610	Light responsive
Maker00047149		1567	1608	Light responsive
Maker00074910		956	997	Light responsive
Gene.14281		1760	1799	Light responsive
Gene.14283		1159	1198	Light responsive
Maker00003346		1872	1912	Light responsive
Maker00003406		1584	1623	Light responsive
Maker00008224		1887	1927	Light responsive
Maker00012805		1905	1944	Light responsive
Maker00024930		523	562	Light responsive
Maker00025486		165	205	Light responsive
Maker00040205		519	558	Light responsive
Maker00042305		782	821	Light responsive
Maker00042305		1812	1851	Light responsive
Maker00043827		1217	1257	Light responsive
Maker00043827		1407	1445	Light responsive
Maker00047149		1582	1621	Light responsive
Maker00053039		1809	1849	Light responsive
Maker00060678		1887	1927	Light responsive
Maker00071140		494	533	Light responsive
Maker00074910		1086	1126	Light responsive
Maker00074910		1087	1125	Light responsive
Maker00077582		1148	1187	Light responsive
Maker00078039		100	140	Light responsive
Maker00078039		1897	1937	Light responsive
Maker00084561		466	506	Light responsive
Maker00084561		1240	1279	Light responsive
Maker00084561		1866	1904	Light responsive
Maker00092999		101	140	Light responsive
Maker00092999		303	343	Light responsive
Maker00092999		1897	1937	Light responsive
Maker00000056		1863	1900	Light responsive
Maker00000768		1601	1638	Light responsive
Maker00003346		948	985	Light responsive
Maker00003406		1533	1570	Light responsive
Maker00012805		535	572	Light responsive
Maker00013927		1596	1633	Light responsive
Maker00016870		1808	1845	Light responsive
Maker00039158		1804	1841	Light responsive
Maker00047149		1531	1568	Light responsive
Maker00053039		233	270	Light responsive
Maker00065350		1243	1280	Light responsive
Maker00073713		232	269	Light responsive
Maker00073713		269	306	Light responsive
Maker00088387		1086	1123	Light responsive
Maker00003406		1418	1458	Light responsive
Maker00006282		1133	1173	Light responsive
Maker00041241		1802	1842	Light responsive
Maker00047149		1416	1456	Light responsive
Maker00059396		341	381	Light responsive
Maker00070084		1932	1972	Light responsive
Maker00083407		1932	1972	Light responsive
Maker00038000		78	116	Light responsive
Maker00074910		605	643	Light responsive
Gene.14270		1908	1947	Light responsive
Gene.14270		1911	1947	Light responsive
Gene.14270		1911	1947	Light responsive
Gene.14281		403	442	Light responsive
Gene.14281		406	442	Light responsive
Gene.14281		406	442	Light responsive
Maker00000056		1590	1626	Light responsive
Maker00000056		1086	1122	Light responsive
Maker00000056		1590	1626	Light responsive
Maker00000445		132	170	Light responsive
Maker00000445		133	169	Light responsive
Maker00000445		178	216	Light responsive
Maker00000445		179	215	Light responsive
Maker00000445		602	640	Light responsive
Maker00000445		952	988	Light responsive
Maker00000445		179	215	Light responsive
Maker00000445		604	640	Light responsive
Maker00000445		1117	1153	Light responsive
Maker00000768		136	177	Light responsive
Maker00000768		467	508	Light responsive
Maker00000768		863	899	Light responsive
Maker00000768		894	930	Light responsive
Maker00000768		894	930	Light responsive
Maker00003204		30	66	Light responsive
Maker00003204		1839	1875	Light responsive
Maker00003204		1856	1892	Light responsive
Maker00003204		1499	1538	Light responsive
Maker00003204		1500	1536	Light responsive
Maker00003204		1839	1875	Light responsive
Maker00003283		1612	1651	Light responsive
Maker00003346		1018	1054	Light responsive
Maker00003346		1609	1645	Light responsive
Maker00003406		22	58	Light responsive
Maker00003406		1751	1791	Light responsive
Maker00003406		1753	1789	Light responsive
Maker00003406		529	565	Light responsive
Maker00003406		1753	1789	Light responsive
Maker00006282		1214	1250	Light responsive
Maker00006282		1214	1250	Light responsive
Maker00008224		1294	1330	Light responsive
Maker00008224		1462	1498	Light responsive
Maker00008224		1292	1331	Light responsive
Maker00008224		1294	1330	Light responsive
Maker00008224		1462	1498	Light responsive
Maker00012805		969	1005	Light responsive
Maker00012805		238	274	Light responsive
Maker00013013		793	829	Light responsive
Maker00013013		833	871	Light responsive
Maker00013013		834	870	Light responsive
Maker00013013		793	829	Light responsive
Maker00013013		834	870	Light responsive
Maker00013927		1452	1488	Light responsive
Maker00016870		977	1016	Light responsive
Maker00016870		1757	1796	Light responsive
Maker00016870		1760	1796	Light responsive
Maker00016870		1766	1802	Light responsive
Maker00017564		69	105	Light responsive
Maker00024930		1625	1661	Light responsive
Maker00025486		961	997	Light responsive
Maker00038000		1676	1712	Light responsive
Maker00039158		1054	1090	Light responsive
Maker00039158		1222	1258	Light responsive
Maker00039158		1329	1365	Light responsive
Maker00040205		205	241	Light responsive
Maker00040205		262	298	Light responsive
Maker00041241		402	440	Light responsive
Maker00041241		403	439	Light responsive
Maker00041241		1058	1094	Light responsive
Maker00041241		1558	1597	Light responsive
Maker00041241		1560	1596	Light responsive
Maker00041241		403	439	Light responsive
Maker00041241		1058	1094	Light responsive
Maker00041241		1560	1596	Light responsive
Maker00042305		1924	1960	Light responsive
Maker00047149		27	63	Light responsive
Maker00047149		1751	1791	Light responsive
Maker00047149		1753	1789	Light responsive
Maker00047149		533	569	Light responsive
Maker00047149		1753	1789	Light responsive
Maker00053039		302	338	Light responsive
Maker00053039		894	930	Light responsive
Maker00053039		1096	1137	Light responsive
Maker00053039		1421	1462	Light responsive
Maker00058256		675	711	Light responsive
Maker00058256		678	714	Light responsive
Maker00059396		714	750	Light responsive
Maker00060678		1297	1333	Light responsive
Maker00060678		1465	1501	Light responsive
Maker00060678		1295	1334	Light responsive
Maker00060678		1297	1333	Light responsive
Maker00060678		1465	1501	Light responsive
Maker00062515		249	285	Light responsive
Maker00062515		290	328	Light responsive
Maker00062515		291	327	Light responsive
Maker00062515		312	348	Light responsive
Maker00062515		364	402	Light responsive
Maker00062515		365	401	Light responsive
Maker00062515		372	408	Light responsive
Maker00062515		1402	1438	Light responsive
Maker00062515		312	348	Light responsive
Maker00062515		365	401	Light responsive
Maker00062515		372	408	Light responsive
Maker00062719		1414	1450	Light responsive
Maker00062719		1731	1772	Light responsive
Maker00062719		1732	1771	Light responsive
Maker00062719		1734	1770	Light responsive
Maker00062719		634	670	Light responsive
Maker00062719		1414	1450	Light responsive
Maker00062719		1734	1770	Light responsive
Maker00064384		372	408	Light responsive
Maker00065350		700	736	Light responsive
Maker00065350		813	849	Light responsive
Maker00065350		832	868	Light responsive
Maker00065350		392	428	Light responsive
Maker00065350		516	552	Light responsive
Maker00065350		955	991	Light responsive
Maker00069778		177	213	Light responsive
Maker00069778		1578	1614	Light responsive
Maker00070084		565	601	Light responsive
Maker00070084		1352	1388	Light responsive
Maker00071140		1609	1645	Light responsive
Maker00073713		1563	1603	Light responsive
Maker00073713		78	114	Light responsive
Maker00074209		1804	1840	Light responsive
Maker00074209		1918	1954	Light responsive
Maker00074910		714	753	Light responsive
Maker00074910		944	980	Light responsive
Maker00074910		1626	1666	Light responsive
Maker00074910		1628	1664	Light responsive
Maker00074910		1686	1722	Light responsive
Maker00074910		1964	2000	Light responsive
Maker00074910		1374	1410	Light responsive
Maker00075081		974	1012	Light responsive
Maker00075081		975	1011	Light responsive
Maker00075081		1266	1305	Light responsive
Maker00075081		1267	1303	Light responsive
Maker00075081		1875	1911	Light responsive
Maker00075096		1379	1415	Light responsive
Maker00075096		160	196	Light responsive
Maker00076242		674	710	Light responsive
Maker00076242		1104	1140	Light responsive
Maker00076242		1187	1223	Light responsive
Maker00076242		1198	1234	Light responsive
Maker00077507		144	180	Light responsive
Maker00077582		728	764	Light responsive
Maker00077582		891	930	Light responsive
Maker00077582		1311	1347	Light responsive
Maker00077681		153	189	Light responsive
Maker00077681		478	514	Light responsive
Maker00077681		1074	1110	Light responsive
Maker00079308		1817	1853	Light responsive
Maker00082380		12	48	Light responsive
Maker00082380		1598	1636	Light responsive
Maker00082380		1599	1635	Light responsive
Maker00082380		1732	1768	Light responsive
Maker00082380		1924	1960	Light responsive
Maker00082380		1599	1635	Light responsive
Maker00083407		560	596	Light responsive
Maker00083407		1350	1386	Light responsive
Maker00088387		1820	1856	Light responsive
Maker00096083		81	117	Light responsive
Maker00000445		11	50	Light responsive
Maker00003406		1752	1791	Light responsive
Maker00012805		967	1006	Light responsive
Maker00016870		1759	1798	Light responsive
Maker00038000		298	337	Light responsive
Maker00041241		1558	1597	Light responsive
Maker00041241		1559	1598	Light responsive
Maker00047149		1752	1791	Light responsive
Maker00059396		712	751	Light responsive
Maker00062719		1732	1771	Light responsive
Maker00062719		1733	1772	Light responsive
Maker00075081		1874	1913	Light responsive
Maker00003406		1050	1089	Light responsive
Maker00008224		271	310	Light responsive
Maker00047149		1053	1092	Light responsive
Maker00060678		225	264	Light responsive
Maker00064087		1815	1854.5	Light responsive
Maker00070084		1945	1984	Light responsive
Maker00076242		1388	1427.5	Light responsive
Maker00083407		1945	1984	Light responsive
Maker00003406		1328	1370	Light responsive
Maker00047149		1324	1366	Light responsive
