# Supplementary material for: Analysis of WRKY Resistance Gene Family in Boehmeria nivea (L.) Gaudich: Crosstalk Mechanisms of Secondary Cell Wall Thickening and Cadmium Stress
Source: Front Plant Sci. 2022 Mar 28;13:812988. doi: 10.3389/fpls.2022.812988 (PMC9010656; doi:10.3389/fpls.2022.812988)
Supplement: Supplementary file 8 [file Table_6.XLSX]

## Sheet: Sheet1
Table S6: Potential BnGWRKY Target Genes
Gene ID	The number of W-box
Maker00066434	4
Maker00036176	4
Maker00030006	4
Maker00066887	4
Maker09984	4
Maker09979	4
Maker00025503	4
Maker00050560	4
Maker00030503	4
Maker00006885	4
Maker00038450	4
Gene.35560	4
Maker00050933	4
Maker00082993	4
Maker00036256	4
Maker00092355	4
Maker00030934	4
Maker00036227	4
Maker00025560	4
Gene.70989	4
Maker00030799	4
Maker00038252	4
Maker00037384	4
Maker00036966	4
Maker00044552	4
Maker00066750	4
Maker00092286	4
Maker00092268	4
Maker00044135	4
Maker00092680	4
Maker00050846	4
Maker00092212	4
Maker00038180	4
Maker00033732	4
Maker00037285	4
Maker00030641	4
Maker00043944	4
Maker00025289	4
Maker00030292	4
Maker00030296	4
Maker00030283	4
Maker00066604	4
Maker00031128	4
Maker00044425	4
Maker00044422	4
Maker00066611	4
Maker00033760	4
Gene.13178	4
Gene.13174	4
Gene.13170	4
Gene.13182	4
Maker00044066	4
Maker00038619	4
Maker00025300	4
Maker00050766	4
Maker00092162	4
Maker00036898	4
Maker00044020	4
Maker00044002	4
Maker00025738	4
Maker00037347	4
Maker00037341	4
Maker00025352	4
Maker00043896	4
Maker00030552	4
Maker00006898	4
Maker00031020	4
Maker00033675	4
Maker00033621	4
Maker00036785	4
Maker00025640	4
Maker00024300	4
Maker00071153	4
Maker00031055	4
Maker00025600	4
Maker00082606	4
Maker00038574	4
Maker00025259	4
Maker00092479	4
Maker00059402	4
Maker00036353	4
Maker00006962	4
Maker00025226	4
Maker00050611	4
Maker00050616	4
Maker00093036	4
Maker00058266	4
Maker00074526	4
Maker00074777	4
Maker00074774	4
Maker00023144	4
Maker00058447	4
Maker00058421	4
Maker00058892	4
Maker00058891	4
Maker00058657	4
Maker00058405	4
Maker00008398	4
Maker00058841	4
Maker00023965	4
Maker00074811	4
Maker00074837	4
Maker00003886	4
Maker00039807	4
Gene.52561	4
Maker00058727	4
Maker00008278	4
Maker00040144	4
Maker00058907	4
Maker00058299	4
Maker00062157	4
Maker00063889	4
Maker00063859	4
Gene.72385	4
Gene.25592	4
Maker00034041	4
Maker00034122	4
Maker00096756	4
Maker00002522	4
Maker00064399	4
Maker00064362	4
Maker00064215	4
Maker00064623	4
Maker00064619	4
Maker00064601	4
Maker00096701	4
Maker00034471	4
Maker00089598	4
Maker00034403	4
Maker00064290	4
Maker00093191	4
Maker00002290	4
Maker00062332	4
Maker00062346	4
Maker00064518	4
Maker00053809	4
Maker00047203	4
Maker00064186	4
Maker00034759	4
Maker00093086	4
Maker00034718	4
Maker00064114	4
Maker00064125	4
Maker00062230	4
Maker00064409	4
Maker00064823	4
Maker00063967	4
Maker00034183	4
Maker00064094	4
Maker00034688	4
Maker00003964	4
Maker00064089	4
Maker00003900	4
Maker00034637	4
Maker00089335	4
Maker00064046	4
Maker00064019	4
Maker00062297	4
Maker00034615	4
Maker00013536	4
Maker00013549	4
Maker00000228	4
Maker00062098	4
Maker00062447	4
Gene.76557	4
Maker00062427	4
Maker00000599	4
Maker00012927	4
Maker00040164	4
Gene.64044	4
Maker00000532	4
Maker00000059	4
Maker00000044	4
Maker00013346	4
Maker00000883	4
Maker00000875	4
Maker00013760	4
Maker00000820	4
Maker00040039	4
Maker00012822	4
Maker00002616	4
Maker00012844	4
Maker00013709	4
Maker00000899	4
Maker00062252	4
Maker00062234	4
Maker00013681	4
Maker00013688	4
Maker00013249	4
Maker00018941	4
Maker00013274	4
Maker00013272	4
Maker00013618	4
Maker00000747	4
Maker00000745	4
Maker00013625	4
Maker00013659	4
Gene.25955	4
Maker00012713	4
Maker00019712	4
Maker00085676	4
Maker00000294	4
Maker00000289	4
Maker00000257	4
Maker00073678	4
Maker00072314	4
Maker00043713	4
Maker00073546	4
Maker00065913	4
Gene.41088	4
Gene.41091	4
Maker00020146	4
Maker00091380	4
Maker00091384	4
Maker00080281	4
Maker00003647	4
Maker00012565	4
Maker00062581	4
Maker00078916	4
Maker00042933	4
Maker00062507	4
Maker00065216	4
Maker00066024	4
Maker00020258	4
Maker00091485	4
Maker00020275	4
Maker00012605	4
Maker00066059	4
Maker00015723	4
Maker00063135	4
Maker00072066	4
Maker00091597	4
Maker00066134	4
Maker00047879	4
Maker00066129	4
Maker00047821	4
Maker00091165	4
Maker00091167	4
Maker00091572	4
Maker00024314	4
Maker00014257	4
Maker00091704	4
Maker00079192	4
Maker00065889	4
Maker00047983	4
Maker00089393	4
Maker00091264	4
Maker00069739	4
Maker00069710	4
Maker00065358	4
Maker00091620	4
Maker00091618	4
Maker00060883	4
Maker00060898	4
Gene.8592	4
Maker00040613	4
Maker00009321	4
Maker09903	4
Maker09990	4
Maker00009546	4
Maker00009782	4
Maker09787	4
Maker00009754	4
Maker00009837	4
Maker00065642	4
Maker00015238	4
Maker00060854	4
Gene.46777	4
Maker00040753	4
Maker00009652	4
Maker00009647	4
Maker00040579	4
Maker00040574	4
Maker00009943	4
Maker00015334	4
Maker00089778	4
Maker00065482	4
Maker00065456	4
Maker00021434	4
Maker00021460	4
Maker00052178	4
Maker00065492	4
Maker00019604	4
Maker00086453	4
Maker00050029	4
Maker00088608	4
Maker00065561	4
Maker00050040	4
Maker00065521	4
Maker00021554	4
Maker09706	4
Maker00049987	4
Maker00088729	4
Maker00088712	4
Maker00050165	4
Maker09821	4
Maker09876	4
Maker00055460	4
Maker00051902	4
Maker00089256	4
Maker10002	4
Maker00051959	4
Maker00089291	4
Maker00032822	4
Maker00014170	4
Maker00051566	4
Maker00032888	4
Maker09972	4
Maker00088456	4
Maker00088478	4
Maker00014254	4
Maker00088507	4
Maker00032934	4
Maker00079429	4
Maker00087094	4
Maker00072854	4
Maker00072423	4
Maker00072443	4
Maker00065741	4
Maker00063570	4
Maker00087598	4
Maker00065387	4
Maker00049092	4
Maker00073400	4
Maker00072575	4
Maker00073425	4
Maker00072592	4
Maker00086749	4
Maker00087669	4
Maker00065434	4
Maker00021897	4
Maker00021894	4
Maker00072627	4
Maker00072665	4
Maker00086825	4
Maker00087707	4
Maker00086868	4
Maker00087741	4
Maker00087793	4
Maker00013304	4
Maker00087331	4
Maker00054898	4
Maker00087368	4
Maker00012824	4
Maker00078012	4
Maker00086922	4
Maker00054920	4
Maker00078908	4
Maker00013676	4
Maker00087444	4
Maker00086593	4
Maker00087019	4
Maker00012755	4
Maker00087031	4
Maker00079402	4
Maker00095300	4
Maker00093582	4
Maker00075765	4
Maker00075760	4
Maker00096693	4
Maker00075745	4
Maker00075755	4
Maker00075730	4
Maker00075363	4
Maker00076222	4
Maker00068686	4
Maker00007263	4
Maker00070520	4
Maker00094955	4
Maker00074978	4
Maker00034001	4
Maker00074914	4
Maker00094990	4
Maker00023381	4
Maker00071052	4
Maker00075893	4
Maker00095470	4
Maker00075855	4
Maker00075084	4
Maker00075936	4
Maker00075547	4
Maker00075537	4
Maker00095199	4
Maker00075570	4
Maker00075198	4
Maker00076021	4
Maker00076022	4
Gene.43984	4
Maker00075649	4
Maker00075614	4
Maker00075615	4
Maker00075254	4
Maker00095283	4
Maker00094863	4
Maker00076183	4
Maker00076186	4
Maker00057445	4
Maker00003139	4
Maker00043621	4
Maker00043625	4
Gene.49027	4
Gene.49024	4
Maker00082815	4
Maker00024496	4
Maker00043174	4
Maker00001855	4
Maker00061435	4
Maker00001814	4
Maker00061455	4
Maker00061469	4
Maker00003174	4
Maker00003039	4
Maker00043585	4
Maker00043593	4
Maker00024339	4
Maker00043144	4
Maker00082716	4
Maker00082722	4
Maker00024414	4
Maker00022698	4
Gene.69393	4
Maker00061313	4
Maker00083107	4
Maker00061351	4
Maker00061368	4
Maker00003063	4
Maker00043498	4
Maker00022517	4
Maker00042955	4
Maker00043723	4
Maker00042887	4
Maker00043764	4
Maker00061198	4
Maker00082949	4
Maker00082913	4
Gene.13127	4
Maker00082985	4
Maker00082957	4
Maker00024546	4
Maker00061506	4
Maker00061544	4
Maker00082490	4
Maker00017474	4
Maker00069321	4
Maker00037758	4
Maker00009297	4
Maker00079555	4
Maker00008788	4
Maker00014278	4
Maker00076927	4
Maker00008815	4
Maker00023134	4
Maker00077053	4
Maker00077036	4
Maker00077031	4
Maker00077026	4
Maker00087276	4
Gene.71245	4
Gene.34271	4
Maker00087325	4
Maker00008956	4
Maker00051314	4
Maker00051305	4
Maker00078802	4
Maker00078808	4
Maker00008926	4
Maker00008919	4
Maker00041672	4
Maker00051490	4
Maker00038002	4
Maker00037576	4
Maker00051412	4
Maker00014502	4
Gene.68683	4
Maker00051936	4
Maker00024768	4
Maker00008664	4
Maker00008717	4
Maker00008759	4
Maker00038137	4
Maker00051983	4
Maker00051978	4
Maker00037670	4
Maker00012395	4
Maker00039318	4
Maker00083473	4
Maker00080345	4
Maker00083860	4
Maker00022061	4
Maker00042089	4
Maker00042032	4
Maker00083820	4
Maker00042048	4
Maker00042478	4
Maker00057971	4
Maker00079744	4
Maker00042428	4
Maker00042462	4
Maker00084255	4
Maker00042601	4
Maker00042612	4
Maker00042607	4
Maker00084417	4
Maker00080027	4
Maker00080488	4
Maker00080009	4
Maker00083520	4
Maker00080001	4
Maker00042159	4
Maker00080419	4
Maker00080416	4
Maker00042595	4
Maker00042138	4
Maker00079889	4
Maker00079880	4
Maker00042555	4
Maker00042549	4
Maker00039378	4
Gene.72079	4
Maker00084517	4
Maker00022239	4
Maker00042282	4
Gene.19816	4
Maker00079957	4
Maker00042205	4
Maker00079906	4
Maker00042665	4
Maker00079918	4
Maker00039208	4
Maker00083776	4
Maker00061946	4
Maker00061939	4
Maker00061936	4
Maker00083749	4
Maker00083716	4
Maker00080216	4
Maker00079663	4
Maker00061919	4
Maker00057865	4
Maker00057819	4
Maker00084159	4
Maker00039110	4
Maker00084129	4
Maker00011521	4
Maker00074241	4
Maker00074210	4
Maker00074230	4
Maker00074220	4
Maker00082233	4
Maker00062634	4
Maker00049621	4
Maker00063090	4
Maker00011862	4
Maker00011444	4
Maker00074189	4
Maker00074129	4
Maker00074130	4
Maker00074122	4
Maker00015374	4
Maker00049588	4
Maker00062545	4
Maker00049521	4
Maker00074060	4
Maker00059286	4
Maker00059218	4
Maker00059230	4
Maker00059245	4
Maker00057477	4
Maker00011209	4
Maker00063239	4
Maker00019974	4
Maker00049390	4
Maker00074305	4
Maker00049363	4
Maker00059164	4
Maker00073869	4
Maker00049302	4
Maker00062746	4
Maker00019934	4
Maker00057353	4
Maker00073827	4
Maker00077624	4
Maker00053244	4
Gene.28057	4
Maker00057182	4
Maker00053618	4
Maker00067054	4
Maker00016733	4
Maker00016762	4
Maker00003443	4
Maker00077271	4
Maker00039024	4
Maker00068811	4
Maker00053362	4
Maker00068835	4
Maker00028305	4
Maker00016770	4
Maker00077729	4
Maker00016869	4
Maker00052924	4
Maker00060974	4
Maker00048840	4
Maker00066741	4
Maker00077865	4
Maker00077847	4
Maker00068153	4
Maker00088135	4
Maker00053068	4
Maker00053566	4
Maker00032614	4
Maker00077562	4
Maker00053548	4
Maker00052641	4
Maker00052623	4
Gene.46842	4
Maker00007565	4
Maker00096544	4
Maker00017358	4
Maker00074343	4
Maker00074349	4
Maker00004059	4
Maker00072856	4
Maker00024228	4
Maker00091947	4
Maker00091843	4
Maker00069362	4
Maker00066514	4
Maker00065443	4
Maker00015729	4
Maker00017154	4
Maker00068542	4
Maker00072408	4
Maker00092746	4
Maker00092473	4
Maker00045735	4
Maker00041570	4
Maker00029969	4
Maker00056219	4
Maker00085093	4
Maker00069869	4
Maker00081176	4
Maker00056797	4
Maker00028275	4
Maker00028325	4
Maker00020052	4
Maker00002610	4
Maker00049950	4
Maker00036380	4
Maker00063606	4
Maker00063738	4
Maker00055061	4
Maker00080397	4
Maker00085124	4
Maker00069501	4
Maker00052418	4
Maker00082181	4
Maker09905	5
Maker00030052	5
Maker00025141	5
Maker00037119	5
Maker00092365	5
Maker00090895	5
Maker00036923	5
Maker00025438	5
Maker00025422	5
Maker00044142	6
Maker00036980	5
Maker00001608	5
Maker00083042	5
Maker00031098	5
Maker00006989	7
Maker00022487	5
Maker00008169	5
Gene.87301	6
Maker00058832	5
Maker00058167	5
Maker00074688	5
Maker00058524	5
Maker00022591	6
Maker00008236	5
Maker00064325	5
Maker00034093	5
Maker00093230	5
Maker00034535	5
Maker00091872	5
Maker00063810	6
Maker00096641	5
Maker00034457	5
Maker00089537	5
Maker00019237	5
Maker00034700	5
Maker00064548	5
Maker00019558	5
Gene.68460	5
Maker00064996	6
Maker00034374	7
Maker00065022	7
Maker00019131	5
Maker00089459	5
Maker00018962	5
Maker00064857	5
Maker00002201	5
Maker00064090	5
Maker00034673	5
Maker00064015	5
Maker00071851	5
Maker00000618	5
Maker00013551	5
Maker00019236	7
Maker00096223	5
Maker00013071	5
Maker00062439	5
Maker00013076	5
Maker00072278	6
Maker00013847	5
Maker00062392	5
Maker00086330	5
Maker00039979	6
Maker00012874	5
Maker00019421	5
Maker00018993	5
Maker00019877	7
Maker00000388	7
Maker00068351	5
Maker00013643	5
Maker00000339	5
Maker00040342	6
Maker00013562	8
Maker00073648	5
Maker00043702	5
Maker00065974	6
Maker00065942	6
Maker00062871	5
Maker00078875	5
Maker00032626	5
Maker00079685	5
Maker00043221	6
Maker00080289	5
Maker00003643	5
Maker00068169	5
Maker00003658	6
Maker00062851	5
Maker00079267	5
Maker00091329	5
Maker00091473	5
Maker00012606	7
Maker00012618	7
Maker00047907	5
Maker00063130	5
Maker00053760	5
Maker00047861	6
Maker00032372	5
Maker00065849	5
Maker00065894	5
Maker00063209	6
Maker00063197	5
Maker00091205	5
Gene.43643	5
Maker00009550	5
Maker00009768	5
Maker00009730	6
Gene.36046	5
Maker00066322	5
Maker00020149	5
Maker00060828	5
Maker00009948	5
Maker00056629	5
Maker00033557	6
Maker00010072	5
Maker00065462	6
Maker00021476	7
Maker00036597	7
Maker00051745	6
Maker00051748	6
Maker00021503	5
Maker00050105	5
Maker00088386	5
Maker00088377	5
Maker00021287	5
Maker00088489	6
Maker00051625	5
Maker00019512	5
Maker00088546	5
Maker00086641	5
Maker00072498	5
Maker00063590	5
Maker00087127	5
Maker00072536	5
Maker00093055	5
Maker00077951	5
Maker00012842	5
Gene.7718	5
Maker00087473	6
Maker00094872	6
Maker00075781	7
Maker00075388	5
Maker00085197	5
Maker00074904	5
Maker00094952	6
Maker00094925	5
Maker00074906	5
Maker00074918	5
Maker00075422	5
Maker00075430	5
Maker00095457	6
Maker00075007	6
Maker00075097	5
Maker00023495	5
Maker00059456	5
Maker00075943	6
Maker00075554	5
Maker00075506	5
Maker00075147	5
Maker00075118	6
Maker00044475	5
Maker00012417	5
Maker00086340	5
Maker00024516	5
Maker00061478	6
Maker00061480	5
Maker00003020	5
Maker00024391	6
Maker00003402	5
Maker00043051	5
Maker00082641	5
Maker00049696	5
Maker00061359	5
Maker00043464	5
Maker00002952	5
Maker00042936	5
Maker00061222	5
Maker00042982	5
Maker00003277	6
Maker00043321	5
Maker00082508	5
Maker00082894	5
Maker00082478	6
Maker00051261	6
Maker00069396	5
Maker00077030	6
Maker00069410	5
Maker00008963	5
Maker00008939	6
Maker00008902	7
Maker00077190	5
Maker00077187	5
Maker00024693	5
Maker00077159	5
Maker00077169	5
Maker00037950	6
Gene.70169	5
Maker00038005	5
Maker00051889	5
Maker00090182	5
Maker00037554	5
Maker00041246	5
Maker00076876	5
Maker00083893	7
Maker00042480	5
Gene.27692	5
Maker00080016	8
Maker00083931	5
Maker00083942	5
Maker00083915	5
Maker00080418	5
Maker00039529	5
Maker00084509	7
Maker00083664	5
Maker00079568	5
Maker00079975	6
Maker00042627	5
Maker00042639	5
Maker00042661	5
Maker00061961	6
Maker00079694	5
Maker00042352	5
Maker00042339	5
Maker00020009	5
Maker00016680	5
Maker00059309	5
Maker00074091	6
Maker00011798	5
Maker00001096	5
Maker00060133	5
Maker00074303	5
Maker00053173	5
Maker00066547	5
Maker00077712	5
Gene.88416	5
Maker00077429	6
Maker00052596	5
Maker00016890	5
Maker00016927	5
Maker00077488	5
Maker00017008	8
Maker00077531	5
Maker00028513	5
Maker00085031	5
Maker00059567	5
Maker00067602	5
Maker00091869	5
Maker00065116	5
Maker00068290	5
Maker00030405	5
Maker00069898	7
Maker00007005	5
Maker00070761	6
