# Supplementary material for: Analysis of WRKY Resistance Gene Family in Boehmeria nivea (L.) Gaudich: Crosstalk Mechanisms of Secondary Cell Wall Thickening and Cadmium Stress
Source: Front Plant Sci. 2022 Mar 28;13:812988. doi: 10.3389/fpls.2022.812988 (PMC9010656; doi:10.3389/fpls.2022.812988)
Supplement: Supplementary file 9 [file Table_7.XLSX]

## Sheet: a
Table S7: The RNA-seq data of BnGWRKY genes in different tissues and fiber growth.
GeneID	Root	Phloem_1	Phloem_2	Phloem_3	Phloem_4	Phloem_5	Leaf			GeneID	Root	Phloem_3	Leaf
BnGWRKY1	0.45	1.53	0.29	0.44	0.23	0.57	2.11			BnGWRKY1	0.45	0.44	2.11
BnGWRKY2	48.77	31.69	8.21	13.55	5.43	25.13	34.24			BnGWRKY2	48.77	13.55	34.24
BnGWRKY3	0.97	0.13	0.25	0.12	0.32	1.17	15.19			BnGWRKY3	0.97	0.12	15.19
BnGWRKY4	0.12	2.13	0.75	0.41	0.22	0.27	2.1			BnGWRKY4	0.12	0.41	2.1
BnGWRKY5	0.94	0.84	0.04	0.33	0.09	0.5	0			BnGWRKY5	0.94	0.33	0
BnGWRKY6	1.59	0.46	0.01	0.1	0.05	0.11	0			BnGWRKY6	1.59	0.1	0
BnGWRKY7	115.16	16.29	4.39	9.59	4.65	23.41	15.73			BnGWRKY7	115.16	9.59	15.73
BnGWRKY8	1.81	5.33	0.91	5.62	1.14	13.46	1.33			BnGWRKY8	1.81	5.62	1.33
BnGWRKY9	1.11	5.02	3.96	3.38	2.86	5.93	2.59			BnGWRKY9	1.11	3.38	2.59
BnGWRKY10	20.24	64.44	19.08	34.38	13.77	41.7	44.4			BnGWRKY10	20.24	34.38	44.4
BnGWRKY11	11.69	12.83	12.66	13	13.21	20.19	12.22			BnGWRKY11	11.69	13	12.22
BnGWRKY12	10.45	5.23	6.07	5.83	6.82	10.84	12.22			BnGWRKY12	10.45	5.83	12.22
BnGWRKY13	9.58	4.26	0.43	0.48	0.19	2.51	11.08			BnGWRKY13	9.58	0.48	11.08
BnGWRKY14	2.44	8.94	1.32	3.33	0.46	8.08	4.22			BnGWRKY14	2.44	3.33	4.22
BnGWRKY15	27.24	40.88	12.7	39.86	24.76	64.88	68.73			BnGWRKY15	27.24	39.86	68.73
BnGWRKY16	33.31	25.19	25.47	32.54	32.68	29.67	35.93			BnGWRKY16	33.31	32.54	35.93
BnGWRKY17	27.38	14.95	3.88	23.18	10.35	38.24	8.6			BnGWRKY17	27.38	23.18	8.6
BnGWRKY18	1.63	3.13	2.9	5.08	1.68	4.68	6.61			BnGWRKY18	1.63	5.08	6.61
BnGWRKY19	26.4	23.45	16.69	27.21	29.71	48.48	21.09			BnGWRKY19	26.4	27.21	21.09
BnGWRKY20	0.27	0.38	0.04	0.27	0	0.1	0.16			BnGWRKY20	0.27	0.27	0.16
BnGWRKY21	0.31	0.19	0.05	0	0.02	1.2	0.17			BnGWRKY21	0.31	0	0.17
BnGWRKY22	0.16	0	0.07	0.31	0.3	1.23	0			BnGWRKY22	0.16	0.31	0
BnGWRKY23	7.01	4.67	0.23	1.12	0.39	7.75	4.02			BnGWRKY23	7.01	1.12	4.02
BnGWRKY24	25.1	0.37	0.01	0.65	2.24	7.45	0.34			BnGWRKY24	25.1	0.65	0.34
BnGWRKY25	42.84	76	21.76	69.26	27.07	84.32	68.73			BnGWRKY25	42.84	69.26	68.73
BnGWRKY26	0.51	1.97	0.79	0.07	0	0.08	1.24			BnGWRKY26	0.51	0.07	1.24
BnGWRKY27	75.54	0.72	0.35	0.25	0.31	1	35.04			BnGWRKY27	75.54	0.25	35.04
BnGWRKY28	4.82	4.32	0.37	0.53	0.16	2.46	11.08			BnGWRKY28	4.82	0.53	11.08
BnGWRKY29	45.62	4.38	1.5	1.57	0.82	4.9	35.04			BnGWRKY29	45.62	1.57	35.04
BnGWRKY30	9.31	15.75	7.02	13.94	17.89	36.27	2.62			BnGWRKY30	9.31	13.94	2.62
BnGWRKY31	19.53	19.85	2.21	39.35	10.7	16.37	25.73			BnGWRKY31	19.53	39.35	25.73
BnGWRKY32	44.14	4.93	4.49	3.41	11.01	5.73	9.55			BnGWRKY32	44.14	3.41	9.55
BnGWRKY33	26.79	11.87	14.02	16.52	29.25	21.51	21.91			BnGWRKY33	26.79	16.52	21.91
BnGWRKY34	0.16	1.21	0.38	0.24	0.08	0.61	1.26			BnGWRKY34	0.16	0.24	1.26
BnGWRKY35	20.32	30.8	23.07	62.04	42.61	45.1	16.91			BnGWRKY35	20.32	62.04	16.91
BnGWRKY36	7.31	14.79	16.26	15	11.61	19.6	19.76			BnGWRKY36	7.31	15	19.76
BnGWRKY37	0.38	1.41	0.06	0.21	0.28	1.48	0.49			BnGWRKY37	0.38	0.21	0.49
BnGWRKY38	19.17	13.25	13.64	19.3	28.05	15.21	39.85			BnGWRKY38	19.17	19.3	39.85
BnGWRKY39	63.56	27.7	33.27	51	55.22	35.77	39.85			BnGWRKY39	63.56	51	39.85
BnGWRKY40	42	50.55	19.52	20.93	10.78	18.67	21.11			BnGWRKY40	42	20.93	21.11
BnGWRKY41	1.8	5.77	3.32	3.61	3.14	4.5	30.75			BnGWRKY41	1.8	3.61	30.75
BnGWRKY42	1.6	1.23	1.05	1	1.4	1.18	30.63			BnGWRKY42	1.6	1	30.63
BnGWRKY43	1.25	0.25	0.73	0.53	2.91	5.19	0.6			BnGWRKY43	1.25	0.53	0.6
BnGWRKY44	0	0.12	0.04	0.03	0.01	0.08	0.37			BnGWRKY44	0	0.03	0.37
BnGWRKY45	46.27	29.01	28.93	25.5	47.73	44.1	22.46			BnGWRKY45	46.27	25.5	22.46
BnGWRKY46	1	5.56	2.28	6.12	1.73	6.63	1			BnGWRKY46	1	6.12	1
BnGWRKY47	9.11	12.48	14.6	25.48	21.36	17.49	37.21			BnGWRKY47	9.11	25.48	37.21
BnGWRKY48	8.98	0	0.1	2.38	0.95	1.03	37.19			BnGWRKY48	8.98	2.38	37.19
BnGWRKY49	14.23	3.91	4.07	5.15	7.33	10.97	34.31			BnGWRKY49	14.23	5.15	34.31
BnGWRKY50	38.96	1.51	0.28	0.7	0.56	0.13	2.41			BnGWRKY50	38.96	0.7	2.41
BnGWRKY51	10.21	29.34	16.41	24.15	11.03	15.15	11.65			BnGWRKY51	10.21	24.15	11.65
BnGWRKY52	0.19	1.79	0.02	0.23	0.05	15.94	0.34			BnGWRKY52	0.19	0.23	0.34
BnGWRKY53	13.15	29.65	8.94	24.33	5.27	11.4	18.52			BnGWRKY53	13.15	24.33	18.52
BnGWRKY54	19.45	13.24	7.9	9.5	8.93	19.85	46.16			BnGWRKY54	19.45	9.5	46.16
BnGWRKY55	67.5	50	31.22	29.86	29.72	66.69	46.16			BnGWRKY55	67.5	29.86	46.16
BnGWRKY56	8	38.18	9.68	14.56	8.03	9.61	11.8			BnGWRKY56	8	14.56	11.8
BnGWRKY57	160.1	42.87	27.46	40.74	30.55	73.41	67.88			BnGWRKY57	160.1	40.74	67.88
BnGWRKY58	35	0.36	0	0.37	0.73	0.25	0.76			BnGWRKY58	35	0.37	0.76
BnGWRKY59	41.6	0.56	0.12	0.78	2.79	1.01	0.76			BnGWRKY59	41.6	0.78	0.76
BnGWRKY60	22.19	33.77	31.46	19.98	13.3	29.97	57.6			BnGWRKY60	22.19	19.98	57.6

## Sheet: b
Table S7: The RNA-seq data of BnGWRKY genes in different tissues and fiber growth.
FPKM>0 in all 8 tissues	Constitutive expression	Preferential expression in
		phloem_third period	Terrestrial root	Leaf green variety ZZ_1
BnGWRKY1	BnGWRKY10	BnGWRKY8	BnGWRKY2	BnGWRKY1
BnGWRKY2	BnGWRKY15	BnGWRKY9	BnGWRKY7	BnGWRKY3
BnGWRKY3	BnGWRKY16	BnGWRKY30	BnGWRKY17	BnGWRKY4
BnGWRKY4	BnGWRKY19	BnGWRKY31	BnGWRKY23	BnGWRKY10
BnGWRKY7	BnGWRKY25	BnGWRKY35	BnGWRKY24	BnGWRKY12
BnGWRKY8	BnGWRKY39	BnGWRKY46	BnGWRKY27	BnGWRKY13
BnGWRKY9	BnGWRKY40	BnGWRKY51	BnGWRKY29	BnGWRKY15
BnGWRKY10	BnGWRKY45		BnGWRKY32	BnGWRKY18
BnGWRKY11	BnGWRKY55		BnGWRKY40	BnGWRKY28
BnGWRKY12	BnGWRKY57		BnGWRKY45	BnGWRKY36
BnGWRKY13			BnGWRKY50	BnGWRKY38
BnGWRKY14			BnGWRKY55	BnGWRKY41
BnGWRKY15			BnGWRKY57	BnGWRKY42
BnGWRKY16			BnGWRKY58	BnGWRKY47
BnGWRKY17			BnGWRKY59	BnGWRKY48
BnGWRKY18				BnGWRKY49
BnGWRKY19				BnGWRKY54
BnGWRKY23				BnGWRKY60
BnGWRKY24
BnGWRKY25
BnGWRKY27
BnGWRKY28
BnGWRKY29
BnGWRKY30
BnGWRKY31
BnGWRKY32
BnGWRKY33
BnGWRKY34
BnGWRKY35
BnGWRKY36
BnGWRKY37
BnGWRKY38
BnGWRKY39
BnGWRKY40
BnGWRKY41
BnGWRKY42
BnGWRKY43
BnGWRKY45
BnGWRKY46
BnGWRKY47
BnGWRKY49
BnGWRKY50
BnGWRKY51
BnGWRKY52
BnGWRKY53
BnGWRKY54
BnGWRKY55
BnGWRKY56
BnGWRKY57
BnGWRKY59
BnGWRKY60
