# Supplementary material for: Analysis of WRKY Resistance Gene Family in Boehmeria nivea (L.) Gaudich: Crosstalk Mechanisms of Secondary Cell Wall Thickening and Cadmium Stress
Source: Front Plant Sci. 2022 Mar 28;13:812988. doi: 10.3389/fpls.2022.812988 (PMC9010656; doi:10.3389/fpls.2022.812988)
Supplement: Supplementary file 10 [file Table_8.XLSX]

## Sheet: Sheet1
Table S8: The primers used in this study.
Primer name	subfamily	Primer sequence	Primer name	Primer sequence
BnGWRKY2-f	Ⅲ	TAGTGATAACTCCGACGACCAT	BnGWRKY2-r	TCTCCTCTTGTAACATCCTCTCC
BnGWRKY4-f	Ⅲ	TGTCAAGACCGAGGCGATAA	BnGWRKY4-r	TTGAGGAGACACCGAGAAGTAG
BnGWRKY15-f	Ⅲ	TCTCGCCACCATTCAATTCAATTAC	BnGWRKY15-r	CGCTGTTACCATACGGAACTATATC
BnGWRKY27-f	Ⅲ	GAAGGACCTCAGGATGATGGCTAT	BnGWRKY27-r	CAAGTGTGGCTTCCTCTGTATGTG
BnGWRKY40-f	Ⅲ	CTCTCAATGCTCAACCACACCAA	BnGWRKY40-r	CACCTTCACTTGCTCTGTCCATC
BnGWRKY50-f	Ⅱc	TCTCAGCCTTGTTGCCTTGTTC	BnGWRKY50-r	CTTCCTCCACTTGTATCCATCATCA
BnGWRKY58-f	Ⅱc	TGATGTGGATGTGCTTGATGATGG	BnGWRKY58-r	AGTGGTTGTGTCTGCCTTCGTA
BnGWRKY10-f	Ⅱb	GCCTTCTTACTGCTAATACTGGAA	BnGWRKY10-r	CGCTGTAATTGCTTGTCACTTG
BnGWRKY14-f	Ⅱb	TCATCACAGCAGCAAGATTCAG	BnGWRKY14-r	CTCCATTGACAACCATCAGCAA
BnGWRKY46-f	Ⅱb	GGCGAATTGGACCGAGTGAAC	BnGWRKY46-r	TTTGGTTGTGCTGCTTTGATTGC
BnGWRKY20-f	Ⅱb	CCACAACCACCTCCACCACAA	BnGWRKY20-r	ACCTCCACCGTCTTGCTTCC
BnGWRKY44-f	Ⅱb	GGAACACCACCGCCAACAA	BnGWRKY44-r	TGAGAAGAGGAGTAGGAAGAGTAGG
