# Supplementary material for: Analysis of WRKY Resistance Gene Family in Boehmeria nivea (L.) Gaudich: Crosstalk Mechanisms of Secondary Cell Wall Thickening and Cadmium Stress
Source: Frontiers journal article supplement (doi:10.3389/fpls.2022.812988), 2022-03-28
Supplement: Table_9.pdf [file Table_9.pdf]

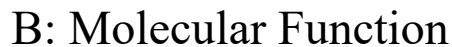

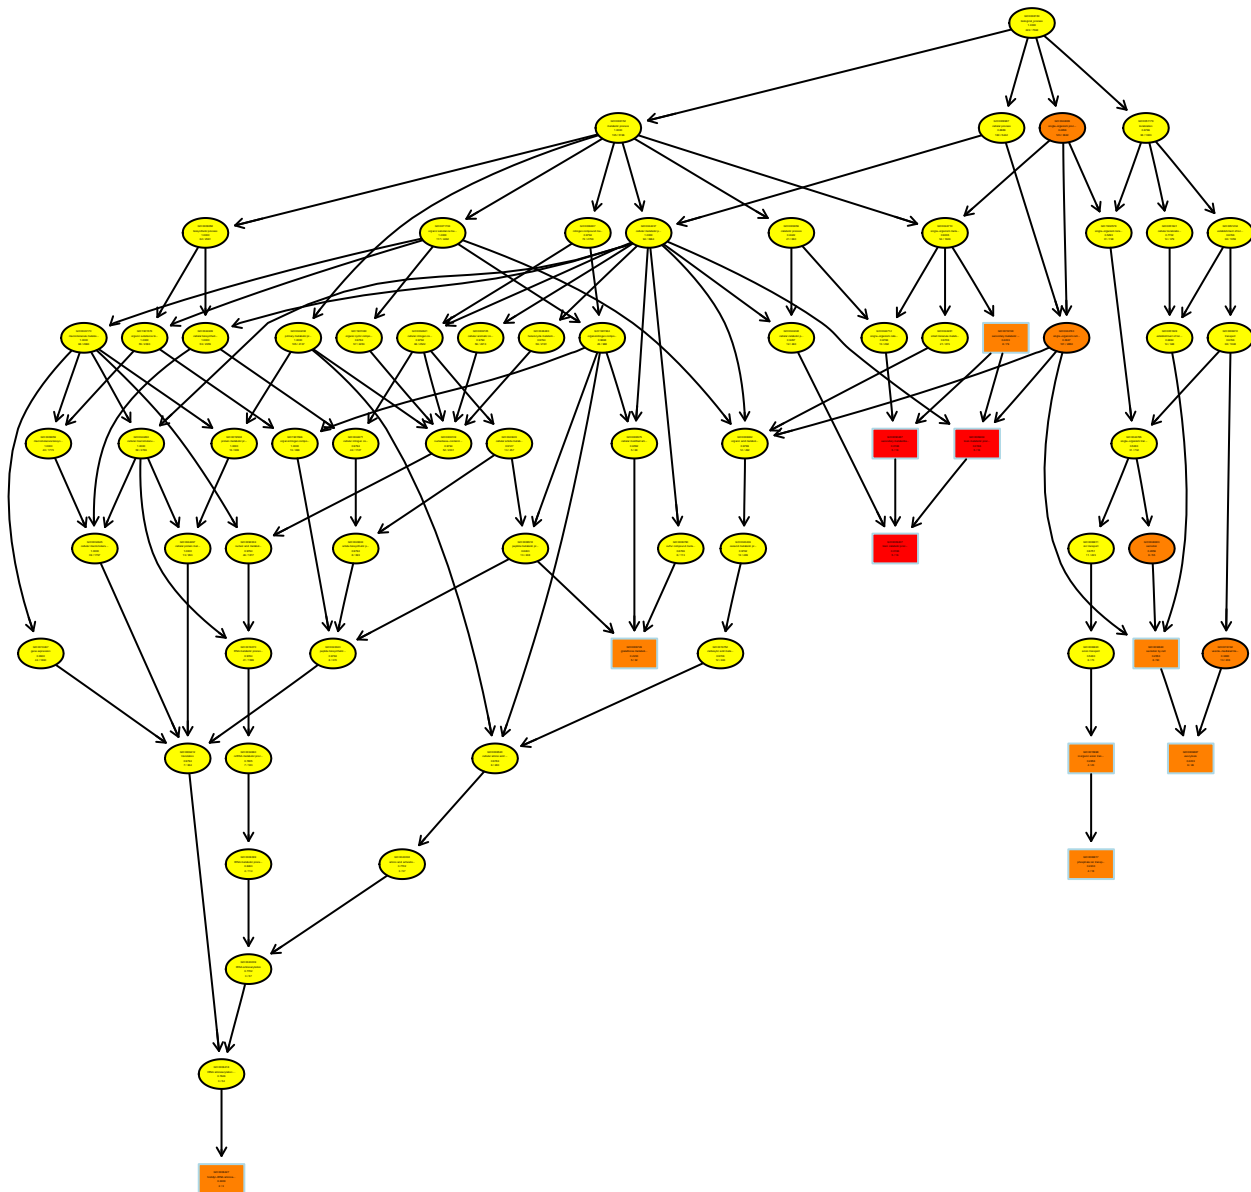

C: Biological Process
